# Supplementary material
Source: publisher figshare collection journal article supplement (https://acs.figshare.com/ndownloader/files/5113309)
Supplement: Supplementary file 1 [file 5113309]

data_x
# 1. SUBMISSION DETAILS 

_publ_contact_author
;
        Prof. Dr. Markus Albrecht
        Institut f\"ur Organische Chemie
        RWTH Aachen
        Landoltweg 1
        D-52074 Aachen
        Germany
;
_publ_contact_author_phone        '49 241 809 4678'
_publ_contact_author_fax          '49 241 809 2385'
_publ_contact-Author_email        'markus.albrecht@oc.rwth-aachen.de'
_publ_requested_journal           'J. Am. Chem. Soc.'
_publ_requested_coeditor_name     ?

_publ_contact_letter
;

;        

#==========================================================================

# 3. TITLE AND AUTHOR LIST

_publ_section_title
;
	Hierarchical assembly of helicate-type dinuclear titanium(IV) complexes
;

loop_
 _publ_author_name
 _publ_author_address
     'Albrecht, Markus'
;     Institut f\"ur Organische Chemie 
      RWTH Aachen
      Landoltweg 1
      D-52074 Aachen
      Germany
;     
     'Mirtschin, Sebastian'
;     Institut f\"ur Organische Chemie 
      RWTH Aachen
      Landoltweg 1
      D-52074 Aachen
      Germany
;
     'de Groot, Marita'
;     Institut f\"ur Organische Chemie 
      RWTH Aachen
      Landoltweg 1
      D-52074 Aachen
      Germany
;
     'Janser, Ingo'
;     Institut f\"ur Organische Chemie 
      RWTH Aachen
      Landoltweg 1
      D-52074 Aachen
      Germany
;     
     'Runsink, Jan'
;     Institut f\"ur Organische Chemie 
      RWTH Aachen
      Landoltweg 1
      D-52074 Aachen
      Germany
;     
     'Raabe, Gerhard'
;     Institut f\"ur Organische Chemie 
      RWTH Aachen
      Landoltweg 1
      D-52074 Aachen
      Germany
;     
     'Kogej, Michael'
;     Kekule-Institut f\"ur Organische Chemie und Biochemie 
      der Universit\"at Bonn
      Gerhard-Domagk-Strasse 1
      D-53121 Bonn
      Germany
;     
     'Schalley, Christoph A.'
;     Kekule-Institut f\"ur Organische Chemie und Biochemie 
      der Universit\"at Bonn
      Gerhard-Domagk-Strasse 1
      D-53121 Bonn
      Germany
;     
     'Fr\"ohlich, Roland'
;     Organisch-Chemisches Institut 
      der Universit\"at M\"unster
      Corrensstrasse 40
      D-48149 M\"unster
      ;     
     'Schalley, Christoph A.'
;     Kekule-Institut f\"ur Organische Chemie und Biochemie 
      der Universit\"at Bonn
      Gerhard-Domagk-Strasse 1
      D-53121 Bonn
      Germany
#==========================================================================
 
data_fro3025 #(Li[Li3(4)6Ti2])
 
_audit_creation_method            SHELXL-97 
_chemical_name_systematic 
; 
 ? 
; 
_chemical_name_common             ? 
_chemical_melting_point           ? 
_chemical_formula_moiety          ? 
_chemical_formula_sum 
 'C54 H52 Li4 N4 O22 Ti2' 
_chemical_formula_weight          1232.56 
 
loop_ 
 _atom_type_symbol 
 _atom_type_description 
 _atom_type_scat_dispersion_real 
 _atom_type_scat_dispersion_imag 
 _atom_type_scat_source 
 'C'  'C'   0.0033   0.0016 
 'International Tables Vol C Tables 4.2.6.8 and 6.1.1.4' 
 'H'  'H'   0.0000   0.0000 
 'International Tables Vol C Tables 4.2.6.8 and 6.1.1.4' 
 'Li'  'Li'  -0.0003   0.0001 
 'International Tables Vol C Tables 4.2.6.8 and 6.1.1.4' 
 'N'  'N'   0.0061   0.0033 
 'International Tables Vol C Tables 4.2.6.8 and 6.1.1.4' 
 'O'  'O'   0.0106   0.0060 
 'International Tables Vol C Tables 4.2.6.8 and 6.1.1.4' 
 'Ti'  'Ti'   0.2776   0.4457 
 'International Tables Vol C Tables 4.2.6.8 and 6.1.1.4' 
 
_symmetry_cell_setting            'monoclinic'
_symmetry_space_group_name_H-M    'P21/c'
 
loop_ 
 _symmetry_equiv_pos_as_xyz 
 'x, y, z' 
 '-x, y+1/2, -z+1/2' 
 '-x, -y, -z' 
 'x, -y-1/2, z-1/2' 
 
_cell_length_a                    16.943(1) 
_cell_length_b                    23.962(1) 
_cell_length_c                    14.483(1) 
_cell_angle_alpha                 90.00 
_cell_angle_beta                  97.16(1) 
_cell_angle_gamma                 90.00 
_cell_volume                      5834.1(6) 
_cell_formula_units_Z             4 
_cell_measurement_temperature     198(2) 
_cell_measurement_reflns_used     ? 
_cell_measurement_theta_min       ? 
_cell_measurement_theta_max       ? 
 
_exptl_crystal_description        'needle'
_exptl_crystal_colour             'red'
_exptl_crystal_size_max           0.50 
_exptl_crystal_size_mid           0.20 
_exptl_crystal_size_min           0.20 
_exptl_crystal_density_meas       ? 
_exptl_crystal_density_diffrn     1.403 
_exptl_crystal_density_method     'not measured' 
_exptl_crystal_F_000              2544 
_exptl_absorpt_coefficient_mu     0.355 
_exptl_absorpt_correction_type    'none' 
_exptl_absorpt_correction_T_min   0.8425 
_exptl_absorpt_correction_T_max   0.9324 
_exptl_absorpt_process_details    ? 
 
_exptl_special_details 
; 
 ? 
; 
 
_diffrn_ambient_temperature       198(2) 
_diffrn_radiation_wavelength      0.71073 
_diffrn_radiation_type            MoK\a 
_diffrn_radiation_source          'rotating anode Nonius FR591' 
_diffrn_radiation_monochromator   graphite 
_diffrn_measurement_device_type   'Nonius KappaCCD' 
_diffrn_measurement_method        '\w and \f scans'
_diffrn_detector_area_resol_mean  ? 
_diffrn_standards_number          ? 
_diffrn_standards_interval_count  ? 
_diffrn_standards_interval_time   ? 
_diffrn_standards_decay_%         ? 
_diffrn_reflns_number             18701 
_diffrn_reflns_av_R_equivalents   0.0459 
_diffrn_reflns_av_sigmaI/netI     0.0634 
_diffrn_reflns_limit_h_min        -20 
_diffrn_reflns_limit_h_max        20 
_diffrn_reflns_limit_k_min        -28 
_diffrn_reflns_limit_k_max        26 
_diffrn_reflns_limit_l_min        -17 
_diffrn_reflns_limit_l_max        17 
_diffrn_reflns_theta_min          1.65 
_diffrn_reflns_theta_max          25.00 
_reflns_number_total              10252 
_reflns_number_gt                 6777 
_reflns_threshold_expression      >2sigma(I) 
 
_computing_data_collection        'Collect (Nonius B.V., 1998)' 
_computing_cell_refinement        'Collect (Nonius B.V., 1998)'
_computing_data_reduction         'Denzo-SMN (Otwinowski & Minor, 1997)'
_computing_structure_solution     'SHELXS-97 (Sheldrick, 1990)' 
_computing_structure_refinement   'SHELXL-97 (Sheldrick, 1997)' 
_computing_molecular_graphics     'SCHAKAL (Keller, 1997)' 
_computing_publication_material   'SHELXL-97 (Sheldrick, 1997)' 
 
_refine_special_details 
; 
 Refinement of F^2^ against ALL reflections.  The weighted R-factor wR and 
 goodness of fit S are based on F^2^, conventional R-factors R are based 
 on F, with F set to zero for negative F^2^. The threshold expression of 
 F^2^ > 2sigma(F^2^) is used only for calculating R-factors(gt) etc. and is 
 not relevant to the choice of reflections for refinement.  R-factors based 
 on F^2^ are statistically about twice as large as those based on F, and R- 
 factors based on ALL data will be even larger. 

 The anion Li(DMF)4 is splitted over two positions, refined occupancy 0.46(1)
 to 0.54(1). All atoms in the anion are refined with isotropic thermal
 displacement parameters. 
; 
 
_refine_ls_structure_factor_coef  Fsqd  
_refine_ls_matrix_type            full 
_refine_ls_weighting_scheme       calc  
_refine_ls_weighting_details 
 'calc w=1/[\s^2^(Fo^2^)+(0.1624P)^2^+13.8398P] where P=(Fo^2^+2Fc^2^)/3' 
_atom_sites_solution_primary      direct 
_atom_sites_solution_secondary    difmap 
_atom_sites_solution_hydrogens    geom 
_refine_ls_hydrogen_treatment     'riding' 
_refine_ls_extinction_method      none 
_refine_ls_extinction_coef        ? 
_refine_ls_number_reflns          10252 
_refine_ls_number_parameters      755 
_refine_ls_number_restraints      0 
_refine_ls_R_factor_all           0.1352 
_refine_ls_R_factor_gt            0.0951 
_refine_ls_wR_factor_ref          0.2901 
_refine_ls_wR_factor_gt           0.2590 
_refine_ls_goodness_of_fit_ref    1.023 
_refine_ls_restrained_S_all       1.023 
_refine_ls_shift/su_max           0.001 
_refine_ls_shift/su_mean          0.000 
 
loop_ 
 _atom_site_label 
 _atom_site_type_symbol 
 _atom_site_fract_x 
 _atom_site_fract_y 
 _atom_site_fract_z 
 _atom_site_U_iso_or_equiv 
 _atom_site_adp_type 
 _atom_site_occupancy 
 _atom_site_symmetry_multiplicity 
 _atom_site_calc_flag 
 _atom_site_refinement_flags 
 _atom_site_disorder_assembly 
 _atom_site_disorder_group 
Ti1 Ti 0.14324(6) 0.36897(4) 0.10999(6) 0.0394(3) Uani 1 1 d . . . 
Ti2 Ti 0.28773(7) 0.48025(4) 0.41964(6) 0.0421(3) Uani 1 1 d . . . 
Li1 Li 0.3105(7) 0.3683(4) 0.2727(6) 0.049(3) Uani 1 1 d . . . 
Li2 Li 0.1208(7) 0.4024(5) 0.3393(7) 0.055(3) Uani 1 1 d . . . 
Li3 Li 0.2129(6) 0.4978(5) 0.1850(7) 0.055(3) Uani 1 1 d . . . 
O11 O 0.2616(2) 0.38116(16) 0.1483(2) 0.0405(9) Uani 1 1 d . . . 
O12 O 0.1779(2) 0.37986(16) -0.0085(2) 0.0388(9) Uani 1 1 d . . . 
C11 C 0.3035(3) 0.3815(2) 0.0749(4) 0.0380(13) Uani 1 1 d . . . 
C12 C 0.2569(3) 0.3809(2) -0.0113(3) 0.0354(12) Uani 1 1 d . . . 
C13 C 0.2914(4) 0.3810(2) -0.0925(4) 0.0448(14) Uani 1 1 d . . . 
H13 H 0.2591 0.3802 -0.1510 0.054 Uiso 1 1 calc R . . 
C14 C 0.3746(4) 0.3824(3) -0.0883(4) 0.0519(16) Uani 1 1 d . . . 
H14 H 0.3989 0.3831 -0.1440 0.062 Uiso 1 1 calc R . . 
C15 C 0.4208(4) 0.3828(3) -0.0031(5) 0.0575(17) Uani 1 1 d . . . 
H15 H 0.4771 0.3839 -0.0006 0.069 Uiso 1 1 calc R . . 
C16 C 0.3867(4) 0.3816(3) 0.0791(4) 0.0461(15) Uani 1 1 d . . . 
C17 C 0.4398(4) 0.3807(3) 0.1659(5) 0.0579(18) Uani 1 1 d . . . 
H17 H 0.4952 0.3828 0.1616 0.069 Uiso 1 1 calc R . . 
O17 O 0.4196(3) 0.37757(18) 0.2445(3) 0.0568(12) Uani 1 1 d . . . 
O21 O 0.1386(2) 0.34744(17) 0.2449(2) 0.0431(10) Uani 1 1 d . . . 
O22 O 0.1424(2) 0.29057(17) 0.0998(2) 0.0430(9) Uani 1 1 d . . . 
C21 C 0.1271(3) 0.2933(2) 0.2555(3) 0.0390(13) Uani 1 1 d . . . 
C22 C 0.1291(3) 0.2608(3) 0.1764(3) 0.0403(13) Uani 1 1 d . . . 
C23 C 0.1197(4) 0.2039(3) 0.1770(4) 0.0466(15) Uani 1 1 d . . . 
H23 H 0.1230 0.1825 0.1225 0.056 Uiso 1 1 calc R . . 
C24 C 0.1052(4) 0.1783(3) 0.2597(4) 0.0558(17) Uani 1 1 d . . . 
H24 H 0.0976 0.1391 0.2611 0.067 Uiso 1 1 calc R . . 
C25 C 0.1017(4) 0.2087(3) 0.3380(4) 0.0568(18) Uani 1 1 d . . . 
H25 H 0.0920 0.1903 0.3935 0.068 Uiso 1 1 calc R . . 
C26 C 0.1122(4) 0.2669(3) 0.3387(4) 0.0465(15) Uani 1 1 d . . . 
C27 C 0.1065(4) 0.2972(3) 0.4245(4) 0.0539(17) Uani 1 1 d . . . 
H27 H 0.0977 0.2754 0.4771 0.065 Uiso 1 1 calc R . . 
O27 O 0.1119(3) 0.3475(2) 0.4365(2) 0.0526(11) Uani 1 1 d . . . 
O31 O 0.1259(2) 0.44814(17) 0.1506(2) 0.0435(10) Uani 1 1 d . . . 
O32 O 0.0320(2) 0.37671(18) 0.0714(2) 0.0462(10) Uani 1 1 d . . . 
C31 C 0.0511(3) 0.4668(3) 0.1297(3) 0.0423(14) Uani 1 1 d . . . 
C32 C -0.0020(4) 0.4266(3) 0.0864(3) 0.0456(15) Uani 1 1 d . . . 
C33 C -0.0812(4) 0.4392(3) 0.0610(4) 0.0514(17) Uani 1 1 d . . . 
H33 H -0.1171 0.4118 0.0331 0.062 Uiso 1 1 calc R . . 
C34 C -0.1076(4) 0.4934(3) 0.0771(4) 0.0560(18) Uani 1 1 d . . . 
H34 H -0.1619 0.5027 0.0595 0.067 Uiso 1 1 calc R . . 
C35 C -0.0568(4) 0.5330(3) 0.1176(4) 0.0510(16) Uani 1 1 d . . . 
H35 H -0.0763 0.5694 0.1277 0.061 Uiso 1 1 calc R . . 
C36 C 0.0240(4) 0.5208(3) 0.1445(4) 0.0435(14) Uani 1 1 d . . . 
C37 C 0.0751(4) 0.5651(3) 0.1792(4) 0.0541(16) Uani 1 1 d . . . 
H37 H 0.0502 0.5997 0.1898 0.065 Uiso 1 1 calc R . . 
O37 O 0.1473(3) 0.56359(19) 0.1969(3) 0.0586(12) Uani 1 1 d . . . 
O41 O 0.2923(3) 0.39747(16) 0.3924(2) 0.0457(10) Uani 1 1 d . . . 
O42 O 0.2924(2) 0.45110(17) 0.5424(2) 0.0474(10) Uani 1 1 d . . . 
C41 C 0.2998(3) 0.3660(2) 0.4699(4) 0.0400(13) Uani 1 1 d . . . 
C42 C 0.2998(3) 0.3954(3) 0.5522(4) 0.0407(13) Uani 1 1 d . . . 
C43 C 0.3060(4) 0.3680(3) 0.6370(4) 0.0507(16) Uani 1 1 d . . . 
H43 H 0.3062 0.3885 0.6931 0.061 Uiso 1 1 calc R . . 
C44 C 0.3120(4) 0.3108(3) 0.6388(5) 0.0614(19) Uani 1 1 d . . . 
H44 H 0.3161 0.2918 0.6967 0.074 Uiso 1 1 calc R . . 
C45 C 0.3122(4) 0.2808(3) 0.5585(4) 0.0510(16) Uani 1 1 d . . . 
H45 H 0.3159 0.2413 0.5613 0.061 Uiso 1 1 calc R . . 
C46 C 0.3069(3) 0.3077(2) 0.4721(4) 0.0417(13) Uani 1 1 d . . . 
C47 C 0.3109(4) 0.2741(3) 0.3913(5) 0.0534(16) Uani 1 1 d . . . 
H47 H 0.3116 0.2348 0.4005 0.064 Uiso 1 1 calc R . . 
O47 O 0.3134(3) 0.29053(17) 0.3104(3) 0.0572(12) Uani 1 1 d . . . 
O51 O 0.1700(2) 0.47337(17) 0.3785(3) 0.0473(10) Uani 1 1 d . . . 
O52 O 0.2542(3) 0.55253(17) 0.4526(3) 0.0529(11) Uani 1 1 d . . . 
C51 C 0.1282(4) 0.5175(3) 0.4047(4) 0.0516(16) Uani 1 1 d . . . 
C52 C 0.1744(5) 0.5614(3) 0.4454(4) 0.0573(18) Uani 1 1 d . . . 
C53 C 0.1386(5) 0.6089(3) 0.4736(5) 0.070(2) Uani 1 1 d . . . 
H53 H 0.1700 0.6388 0.5011 0.084 Uiso 1 1 calc R . . 
C54 C 0.0558(6) 0.6127(4) 0.4615(6) 0.084(3) Uani 1 1 d . . . 
H54 H 0.0309 0.6457 0.4798 0.100 Uiso 1 1 calc R . . 
C55 C 0.0118(6) 0.5708(4) 0.4248(6) 0.078(3) Uani 1 1 d . . . 
H55 H -0.0445 0.5740 0.4187 0.093 Uiso 1 1 calc R . . 
C56 C 0.0459(5) 0.5222(3) 0.3949(5) 0.0622(19) Uani 1 1 d . . . 
C57 C -0.0062(5) 0.4779(5) 0.3576(5) 0.077(3) Uani 1 1 d . . . 
H57 H -0.0615 0.4850 0.3559 0.092 Uiso 1 1 calc R . . 
O57 O 0.0114(3) 0.4324(3) 0.3279(3) 0.0657(14) Uani 1 1 d . . . 
O61 O 0.3010(2) 0.49203(15) 0.2831(2) 0.0382(9) Uani 1 1 d . . . 
O62 O 0.3974(2) 0.49735(16) 0.4296(2) 0.0427(10) Uani 1 1 d . . . 
C61 C 0.3756(3) 0.5040(2) 0.2690(3) 0.0352(12) Uani 1 1 d . . . 
C62 C 0.4300(3) 0.5065(2) 0.3508(4) 0.0378(13) Uani 1 1 d . . . 
C63 C 0.5097(4) 0.5160(2) 0.3466(4) 0.0484(15) Uani 1 1 d . . . 
H63 H 0.5462 0.5171 0.4020 0.058 Uiso 1 1 calc R . . 
C64 C 0.5362(4) 0.5240(3) 0.2601(5) 0.0585(18) Uani 1 1 d . . . 
H64 H 0.5911 0.5301 0.2565 0.070 Uiso 1 1 calc R . . 
C65 C 0.4833(4) 0.5231(3) 0.1803(4) 0.0488(15) Uani 1 1 d . . . 
H65 H 0.5022 0.5288 0.1220 0.059 Uiso 1 1 calc R . . 
C66 C 0.4018(3) 0.5137(2) 0.1832(4) 0.0385(13) Uani 1 1 d . . . 
C67 C 0.3498(4) 0.5159(2) 0.0959(4) 0.0419(14) Uani 1 1 d . . . 
H67 H 0.3745 0.5202 0.0410 0.050 Uiso 1 1 calc R . . 
O67 O 0.2775(2) 0.51273(17) 0.0859(3) 0.0466(10) Uani 1 1 d . . . 
Li4A Li -0.3531(12) 0.3520(10) 0.0850(15) 0.042(5) Uiso 0.460(4) 1 d P . 1 
O71A O -0.3705(5) 0.4311(4) 0.1148(6) 0.042(2) Uiso 0.460(4) 1 d P . 1 
C72A C -0.3118(9) 0.4308(7) 0.1422(10) 0.050(3) Uiso 0.460(4) 1 d P . 1 
H72A H -0.2734 0.4242 0.1009 0.060 Uiso 0.460(4) 1 calc PR . 1 
N73A N -0.2864(11) 0.4386(8) 0.2283(13) 0.071(6) Uiso 0.460(4) 1 d P . 1 
C74A C -0.292(3) 0.415(2) 0.299(4) 0.22(2) Uiso 0.460(4) 1 d P . 1 
H74A H -0.2977 0.4425 0.3479 0.328 Uiso 0.460(4) 1 calc PR . 1 
H74B H -0.2433 0.3931 0.3166 0.328 Uiso 0.460(4) 1 calc PR . 1 
H74C H -0.3379 0.3903 0.2912 0.328 Uiso 0.460(4) 1 calc PR . 1 
C75A C -0.2349(16) 0.4999(11) 0.253(2) 0.110(9) Uiso 0.460(4) 1 d P . 1 
H75A H -0.1789 0.4915 0.2733 0.165 Uiso 0.460(4) 1 calc PR . 1 
H75B H -0.2575 0.5198 0.3028 0.165 Uiso 0.460(4) 1 calc PR . 1 
H75C H -0.2392 0.5233 0.1972 0.165 Uiso 0.460(4) 1 calc PR . 1 
O76A O -0.2462(6) 0.3387(5) 0.1278(7) 0.066(3) Uiso 0.460(4) 1 d P . 1 
C77A C -0.1992(9) 0.3073(6) 0.0966(10) 0.053(3) Uiso 0.460(4) 1 d P . 1 
H77A H -0.2168 0.2871 0.0414 0.063 Uiso 0.460(4) 1 calc PR . 1 
N78A N -0.1256(7) 0.3001(5) 0.1351(7) 0.048(3) Uiso 0.460(4) 1 d P . 1 
C79A C -0.0915(8) 0.3298(6) 0.2188(9) 0.052(3) Uiso 0.460(4) 1 d P . 1 
H79A H -0.1328 0.3524 0.2424 0.078 Uiso 0.460(4) 1 calc PR . 1 
H79B H -0.0485 0.3541 0.2037 0.078 Uiso 0.460(4) 1 calc PR . 1 
H79C H -0.0704 0.3028 0.2663 0.078 Uiso 0.460(4) 1 calc PR . 1 
C80A C -0.0739(12) 0.2631(9) 0.0878(15) 0.089(6) Uiso 0.460(4) 1 d P . 1 
H80A H -0.0666 0.2277 0.1216 0.134 Uiso 0.460(4) 1 calc PR . 1 
H80B H -0.0221 0.2811 0.0863 0.134 Uiso 0.460(4) 1 calc PR . 1 
H80C H -0.0986 0.2561 0.0240 0.134 Uiso 0.460(4) 1 calc PR . 1 
O81A O -0.3810(6) 0.3466(4) -0.0487(6) 0.055(2) Uiso 0.460(4) 1 d P . 1 
C82A C -0.3399(8) 0.3492(6) -0.1110(9) 0.037(3) Uiso 0.460(4) 1 d P . 1 
H82A H -0.2844 0.3543 -0.0944 0.045 Uiso 0.460(4) 1 calc PR . 1 
N83A N -0.3669(7) 0.3455(5) -0.2019(8) 0.052(3) Uiso 0.460(4) 1 d P . 1 
C84A C -0.3172(10) 0.3528(7) -0.2793(12) 0.071(4) Uiso 0.460(4) 1 d P . 1 
H84A H -0.2629 0.3632 -0.2535 0.107 Uiso 0.460(4) 1 calc PR . 1 
H84B H -0.3400 0.3822 -0.3213 0.107 Uiso 0.460(4) 1 calc PR . 1 
H84C H -0.3159 0.3177 -0.3138 0.107 Uiso 0.460(4) 1 calc PR . 1 
C85A C -0.4509(8) 0.3373(6) -0.2318(10) 0.054(3) Uiso 0.460(4) 1 d P . 1 
H85A H -0.4804 0.3396 -0.1779 0.080 Uiso 0.460(4) 1 calc PR . 1 
H85B H -0.4592 0.3005 -0.2608 0.080 Uiso 0.460(4) 1 calc PR . 1 
H85C H -0.4700 0.3662 -0.2769 0.080 Uiso 0.460(4) 1 calc PR . 1 
O86A O -0.4165(6) 0.3053(4) 0.1554(7) 0.057(3) Uiso 0.460(4) 1 d P . 1 
C87A C -0.4213(9) 0.2548(7) 0.1552(10) 0.059(4) Uiso 0.460(4) 1 d P . 1 
H87A H -0.3948 0.2351 0.1112 0.071 Uiso 0.460(4) 1 calc PR . 1 
N88A N -0.4608(7) 0.2250(5) 0.2119(7) 0.050(3) Uiso 0.460(4) 1 d P . 1 
C89A C -0.4706(14) 0.1650(9) 0.1988(17) 0.103(7) Uiso 0.460(4) 1 d P . 1 
H89A H -0.4378 0.1453 0.2490 0.155 Uiso 0.460(4) 1 calc PR . 1 
H89B H -0.4539 0.1543 0.1388 0.155 Uiso 0.460(4) 1 calc PR . 1 
H89C H -0.5266 0.1551 0.1997 0.155 Uiso 0.460(4) 1 calc PR . 1 
C90A C -0.5005(10) 0.2487(7) 0.2790(12) 0.075(5) Uiso 0.460(4) 1 d P . 1 
H90A H -0.4743 0.2837 0.3003 0.112 Uiso 0.460(4) 1 calc PR . 1 
H90B H -0.5001 0.2230 0.3317 0.112 Uiso 0.460(4) 1 calc PR . 1 
H90C H -0.5557 0.2564 0.2530 0.112 Uiso 0.460(4) 1 calc PR . 1 
Li4B Li -0.3412(15) 0.3236(11) 0.0380(18) 0.074(6) Uiso 0.540(4) 1 d P . 2 
O71B O -0.3544(8) 0.3938(6) 0.1076(8) 0.099(4) Uiso 0.540(4) 1 d P . 2 
C72B C -0.3158(7) 0.4604(6) 0.1519(8) 0.052(3) Uiso 0.540(4) 1 d P . 2 
H72B H -0.3179 0.4936 0.1159 0.063 Uiso 0.540(4) 1 calc PR . 2 
N73B N -0.2847(8) 0.4575(6) 0.2391(9) 0.052(3) Uiso 0.540(4) 1 d P . 2 
C74B C -0.3231(10) 0.4126(6) 0.3014(10) 0.054(3) Uiso 0.540(4) 1 d P . 2 
H74D H -0.2885 0.3798 0.3099 0.080 Uiso 0.540(4) 1 calc PR . 2 
H74E H -0.3754 0.4015 0.2703 0.080 Uiso 0.540(4) 1 calc PR . 2 
H74F H -0.3290 0.4289 0.3622 0.080 Uiso 0.540(4) 1 calc PR . 2 
C75B C -0.2179(10) 0.4805(8) 0.2800(12) 0.071(4) Uiso 0.540(4) 1 d P . 2 
H75D H -0.1962 0.5057 0.2361 0.106 Uiso 0.540(4) 1 calc PR . 2 
H75E H -0.1790 0.4512 0.2994 0.106 Uiso 0.540(4) 1 calc PR . 2 
H75F H -0.2292 0.5018 0.3347 0.106 Uiso 0.540(4) 1 calc PR . 2 
O76B O -0.2453(12) 0.2856(8) 0.1009(14) 0.143(6) Uiso 0.540(4) 1 d P . 2 
C77B C -0.214(3) 0.2905(19) 0.173(4) 0.241(19) Uiso 0.540(4) 1 d P . 2 
H77B H -0.2467 0.3072 0.2139 0.290 Uiso 0.540(4) 1 calc PR . 2 
N78B N -0.1435(14) 0.2790(9) 0.2148(15) 0.135(7) Uiso 0.540(4) 1 d P . 2 
C79B C -0.105(4) 0.283(2) 0.329(4) 0.36(3) Uiso 0.540(4) 1 d P . 2 
H79D H -0.1298 0.3137 0.3586 0.543 Uiso 0.540(4) 1 calc PR . 2 
H79E H -0.0472 0.2894 0.3332 0.543 Uiso 0.540(4) 1 calc PR . 2 
H79F H -0.1146 0.2477 0.3600 0.543 Uiso 0.540(4) 1 calc PR . 2 
C80B C -0.084(2) 0.2640(16) 0.157(3) 0.213(15) Uiso 0.540(4) 1 d P . 2 
H80D H -0.1005 0.2763 0.0929 0.319 Uiso 0.540(4) 1 calc PR . 2 
H80E H -0.0765 0.2235 0.1579 0.319 Uiso 0.540(4) 1 calc PR . 2 
H80F H -0.0333 0.2822 0.1803 0.319 Uiso 0.540(4) 1 calc PR . 2 
O81B O -0.3174(11) 0.3398(7) -0.0753(12) 0.129(6) Uiso 0.540(4) 1 d P . 2 
C82B C -0.2912(11) 0.3519(8) -0.1495(13) 0.095(5) Uiso 0.540(4) 1 d P . 2 
H82B H -0.3057 0.3869 -0.1775 0.114 Uiso 0.540(4) 1 calc PR . 2 
N83B N -0.2429(9) 0.3177(6) -0.1931(10) 0.092(4) Uiso 0.540(4) 1 d P . 2 
C84B C -0.2152(11) 0.3331(8) -0.2828(13) 0.100(6) Uiso 0.540(4) 1 d P . 2 
H84D H -0.2294 0.3034 -0.3285 0.150 Uiso 0.540(4) 1 calc PR . 2 
H84E H -0.1573 0.3379 -0.2738 0.150 Uiso 0.540(4) 1 calc PR . 2 
H84F H -0.2405 0.3681 -0.3055 0.150 Uiso 0.540(4) 1 calc PR . 2 
C85B C -0.2181(17) 0.2622(12) -0.161(2) 0.170(11) Uiso 0.540(4) 1 d P . 2 
H85D H -0.1744 0.2652 -0.1101 0.255 Uiso 0.540(4) 1 calc PR . 2 
H85E H -0.2000 0.2411 -0.2125 0.255 Uiso 0.540(4) 1 calc PR . 2 
H85F H -0.2630 0.2427 -0.1389 0.255 Uiso 0.540(4) 1 calc PR . 2 
O86B O -0.4284(6) 0.2755(4) 0.0430(7) 0.077(3) Uiso 0.540(4) 1 d P . 2 
C87B C -0.4668(8) 0.2313(5) 0.0336(8) 0.057(3) Uiso 0.540(4) 1 d P . 2 
H87B H -0.5183 0.2313 0.0531 0.068 Uiso 0.540(4) 1 calc PR . 2 
N88B N -0.4402(6) 0.1807(5) -0.0039(7) 0.059(3) Uiso 0.540(4) 1 d P . 2 
C89B C -0.3574(7) 0.1716(5) -0.0240(8) 0.050(3) Uiso 0.540(4) 1 d P . 2 
H89D H -0.3264 0.2058 -0.0104 0.076 Uiso 0.540(4) 1 calc PR . 2 
H89E H -0.3578 0.1618 -0.0897 0.076 Uiso 0.540(4) 1 calc PR . 2 
H89F H -0.3333 0.1412 0.0150 0.076 Uiso 0.540(4) 1 calc PR . 2 
C90B C -0.4864(8) 0.1277(5) -0.0185(9) 0.062(3) Uiso 0.540(4) 1 d P . 2 
H90D H -0.5414 0.1342 -0.0069 0.093 Uiso 0.540(4) 1 calc PR . 2 
H90E H -0.4622 0.0992 0.0246 0.093 Uiso 0.540(4) 1 calc PR . 2 
H90F H -0.4858 0.1150 -0.0827 0.093 Uiso 0.540(4) 1 calc PR . 2 
 
loop_ 
 _atom_site_aniso_label 
 _atom_site_aniso_U_11 
 _atom_site_aniso_U_22 
 _atom_site_aniso_U_33 
 _atom_site_aniso_U_23 
 _atom_site_aniso_U_13 
 _atom_site_aniso_U_12 
Ti1 0.0426(6) 0.0510(7) 0.0239(5) 0.0069(4) 0.0019(4) -0.0033(5) 
Ti2 0.0601(7) 0.0388(6) 0.0248(5) 0.0035(4) -0.0048(4) 0.0035(5) 
Li1 0.071(7) 0.043(6) 0.029(4) 0.003(4) -0.009(4) -0.002(5) 
Li2 0.054(6) 0.074(8) 0.038(5) 0.005(5) 0.007(4) -0.004(6) 
Li3 0.047(6) 0.074(8) 0.043(5) 0.010(5) -0.003(4) -0.014(6) 
O11 0.042(2) 0.048(2) 0.0303(19) 0.0081(16) -0.0003(16) -0.0016(18) 
O12 0.038(2) 0.053(2) 0.0255(17) 0.0114(16) 0.0029(15) 0.0006(18) 
C11 0.043(3) 0.032(3) 0.038(3) 0.010(2) 0.001(2) -0.006(2) 
C12 0.039(3) 0.032(3) 0.035(3) 0.009(2) 0.006(2) 0.000(2) 
C13 0.045(3) 0.049(4) 0.041(3) 0.015(3) 0.007(3) 0.006(3) 
C14 0.044(4) 0.060(4) 0.053(4) 0.019(3) 0.014(3) -0.004(3) 
C15 0.044(4) 0.062(4) 0.066(4) 0.024(3) 0.005(3) -0.005(3) 
C16 0.043(3) 0.043(3) 0.050(3) 0.020(3) -0.001(3) -0.008(3) 
C17 0.044(4) 0.057(4) 0.067(5) 0.027(3) -0.016(3) -0.011(3) 
O17 0.059(3) 0.051(3) 0.053(3) 0.012(2) -0.020(2) -0.009(2) 
O21 0.053(2) 0.052(3) 0.0238(18) 0.0061(16) 0.0032(16) -0.011(2) 
O22 0.051(2) 0.050(2) 0.0268(18) 0.0071(16) 0.0002(16) -0.0093(19) 
C21 0.038(3) 0.047(4) 0.030(3) 0.007(2) -0.002(2) -0.011(3) 
C22 0.038(3) 0.056(4) 0.027(3) 0.008(2) 0.002(2) -0.009(3) 
C23 0.049(4) 0.057(4) 0.032(3) 0.003(3) -0.002(2) -0.013(3) 
C24 0.068(4) 0.056(4) 0.042(3) 0.012(3) -0.001(3) -0.020(3) 
C25 0.070(5) 0.067(5) 0.033(3) 0.015(3) 0.002(3) -0.020(4) 
C26 0.049(4) 0.062(4) 0.027(3) 0.010(3) 0.000(2) -0.014(3) 
C27 0.061(4) 0.076(5) 0.024(3) 0.010(3) 0.002(3) -0.018(4) 
O27 0.064(3) 0.067(3) 0.026(2) 0.0032(19) 0.0033(18) -0.006(2) 
O31 0.042(2) 0.056(3) 0.0311(19) 0.0079(17) -0.0005(16) 0.0018(19) 
O32 0.043(2) 0.065(3) 0.0301(19) 0.0018(18) 0.0010(16) -0.003(2) 
C31 0.038(3) 0.067(4) 0.021(2) 0.011(2) 0.000(2) 0.001(3) 
C32 0.050(4) 0.065(4) 0.021(3) 0.009(3) 0.001(2) 0.012(3) 
C33 0.039(3) 0.087(5) 0.028(3) 0.010(3) 0.002(2) -0.002(3) 
C34 0.048(4) 0.083(5) 0.038(3) 0.022(3) 0.009(3) 0.020(4) 
C35 0.050(4) 0.069(4) 0.034(3) 0.012(3) 0.008(3) 0.011(3) 
C36 0.047(3) 0.056(4) 0.028(3) 0.013(2) 0.005(2) 0.011(3) 
C37 0.054(4) 0.060(4) 0.048(4) 0.009(3) 0.006(3) 0.005(3) 
O37 0.063(3) 0.058(3) 0.053(3) 0.011(2) 0.002(2) 0.004(2) 
O41 0.069(3) 0.037(2) 0.0276(18) 0.0075(16) -0.0086(17) -0.004(2) 
O42 0.065(3) 0.050(3) 0.0258(19) 0.0047(16) 0.0010(17) 0.008(2) 
C41 0.042(3) 0.041(3) 0.036(3) 0.012(2) -0.001(2) -0.003(3) 
C42 0.038(3) 0.046(4) 0.037(3) 0.010(2) 0.002(2) 0.007(3) 
C43 0.051(4) 0.069(5) 0.034(3) 0.021(3) 0.012(3) 0.004(3) 
C44 0.067(5) 0.069(5) 0.050(4) 0.033(3) 0.018(3) 0.011(4) 
C45 0.046(4) 0.047(4) 0.060(4) 0.025(3) 0.007(3) -0.003(3) 
C46 0.037(3) 0.038(3) 0.047(3) 0.011(3) -0.007(2) -0.006(3) 
C47 0.054(4) 0.036(3) 0.066(4) 0.005(3) -0.013(3) -0.007(3) 
O47 0.081(3) 0.038(2) 0.048(3) -0.0017(19) -0.008(2) -0.008(2) 
O51 0.056(3) 0.051(3) 0.033(2) 0.0052(17) 0.0004(18) 0.006(2) 
O52 0.070(3) 0.042(2) 0.043(2) 0.0013(18) -0.003(2) 0.014(2) 
C51 0.065(4) 0.058(4) 0.033(3) 0.015(3) 0.010(3) 0.013(3) 
C52 0.085(5) 0.052(4) 0.035(3) 0.012(3) 0.011(3) 0.015(4) 
C53 0.097(6) 0.055(4) 0.063(4) 0.010(3) 0.023(4) 0.025(4) 
C54 0.105(7) 0.072(6) 0.083(6) 0.022(5) 0.047(5) 0.032(5) 
C55 0.084(6) 0.091(7) 0.065(5) 0.032(5) 0.034(4) 0.033(5) 
C56 0.062(5) 0.079(5) 0.047(4) 0.024(3) 0.012(3) 0.008(4) 
C57 0.059(5) 0.123(8) 0.050(4) 0.032(5) 0.017(4) 0.025(5) 
O57 0.057(3) 0.099(4) 0.041(2) 0.014(3) 0.005(2) -0.005(3) 
O61 0.043(2) 0.041(2) 0.0267(18) 0.0063(15) -0.0074(15) -0.0086(18) 
O62 0.057(3) 0.036(2) 0.0296(19) -0.0020(15) -0.0130(17) 0.0064(19) 
C61 0.043(3) 0.027(3) 0.032(3) 0.004(2) -0.009(2) -0.006(2) 
C62 0.051(4) 0.024(3) 0.033(3) 0.000(2) -0.013(2) -0.002(2) 
C63 0.049(4) 0.039(3) 0.051(4) 0.004(3) -0.021(3) -0.006(3) 
C64 0.045(4) 0.067(5) 0.058(4) 0.014(3) -0.014(3) -0.015(3) 
C65 0.048(4) 0.050(4) 0.046(3) 0.013(3) -0.005(3) -0.013(3) 
C66 0.041(3) 0.036(3) 0.036(3) 0.007(2) -0.005(2) -0.013(2) 
C67 0.050(4) 0.042(3) 0.031(3) 0.012(2) -0.006(2) -0.012(3) 
O67 0.044(3) 0.058(3) 0.034(2) 0.0094(18) -0.0089(17) -0.012(2) 
 
_geom_special_details 
; 
 All esds (except the esd in the dihedral angle between two l.s. planes) 
 are estimated using the full covariance matrix.  The cell esds are taken 
 into account individually in the estimation of esds in distances, angles 
 and torsion angles; correlations between esds in cell parameters are only 
 used when they are defined by crystal symmetry.  An approximate (isotropic) 
 treatment of cell esds is used for estimating esds involving l.s. planes. 
; 
 
loop_ 
 _geom_bond_atom_site_label_1 
 _geom_bond_atom_site_label_2 
 _geom_bond_distance 
 _geom_bond_site_symmetry_2 
 _geom_bond_publ_flag 
Ti1 O22 1.884(4) . ? 
Ti1 O12 1.900(3) . ? 
Ti1 O32 1.907(4) . ? 
Ti1 O31 2.018(4) . ? 
Ti1 O21 2.032(3) . ? 
Ti1 O11 2.034(4) . ? 
Ti1 Li3 3.433(12) . ? 
Ti1 Li1 3.452(10) . ? 
Ti2 O62 1.891(4) . ? 
Ti2 O52 1.902(4) . ? 
Ti2 O42 1.903(4) . ? 
Ti2 O51 2.016(4) . ? 
Ti2 O41 2.026(4) . ? 
Ti2 O61 2.037(3) . ? 
Ti2 Li2 3.466(11) . ? 
Li1 O11 1.912(9) . ? 
Li1 O41 1.930(10) . ? 
Li1 O47 1.940(11) . ? 
Li1 O17 1.954(12) . ? 
Li2 O51 1.946(13) . ? 
Li2 O27 1.947(11) . ? 
Li2 O21 1.949(12) . ? 
Li2 O57 1.975(13) . ? 
Li3 O31 1.912(11) . ? 
Li3 O61 1.933(11) . ? 
Li3 O67 1.944(11) . ? 
Li3 O37 1.949(13) . ? 
O11 C11 1.350(6) . ? 
O12 C12 1.344(6) . ? 
C11 C12 1.392(7) . ? 
C11 C16 1.405(8) . ? 
C12 C13 1.377(7) . ? 
C13 C14 1.405(8) . ? 
C14 C15 1.376(9) . ? 
C15 C16 1.387(9) . ? 
C16 C17 1.451(8) . ? 
C17 O17 1.232(8) . ? 
O21 C21 1.324(7) . ? 
O22 C22 1.361(6) . ? 
C21 C22 1.387(8) . ? 
C21 C26 1.412(7) . ? 
C22 C23 1.374(8) . ? 
C23 C24 1.394(8) . ? 
C24 C25 1.355(9) . ? 
C25 C26 1.406(9) . ? 
C26 C27 1.453(9) . ? 
C27 O27 1.219(8) . ? 
O31 C31 1.343(7) . ? 
O32 C32 1.355(7) . ? 
C31 C36 1.397(9) . ? 
C31 C32 1.412(9) . ? 
C32 C33 1.380(8) . ? 
C33 C34 1.403(10) . ? 
C34 C35 1.363(10) . ? 
C35 C36 1.406(8) . ? 
C36 C37 1.422(9) . ? 
C37 O37 1.220(8) . ? 
O41 C41 1.345(6) . ? 
O42 C42 1.346(7) . ? 
C41 C42 1.384(8) . ? 
C41 C46 1.401(8) . ? 
C42 C43 1.385(7) . ? 
C43 C44 1.374(9) . ? 
C44 C45 1.367(10) . ? 
C45 C46 1.400(8) . ? 
C46 C47 1.430(9) . ? 
C47 O47 1.242(7) . ? 
O51 C51 1.353(7) . ? 
O52 C52 1.359(8) . ? 
C51 C56 1.388(10) . ? 
C51 C52 1.398(10) . ? 
C52 C53 1.375(9) . ? 
C53 C54 1.394(12) . ? 
C54 C55 1.322(12) . ? 
C55 C56 1.393(11) . ? 
C56 C57 1.441(12) . ? 
C57 O57 1.223(10) . ? 
O61 C61 1.336(6) . ? 
O62 C62 1.345(7) . ? 
C61 C66 1.391(8) . ? 
C61 C62 1.409(7) . ? 
C62 C63 1.379(8) . ? 
C63 C64 1.395(9) . ? 
C64 C65 1.371(8) . ? 
C65 C66 1.404(8) . ? 
C66 C67 1.450(7) . ? 
C67 O67 1.217(7) . ? 
Li4A O76A 1.87(2) . ? 
Li4A O86A 1.93(2) . ? 
Li4A O81A 1.94(2) . ? 
Li4A O71A 1.97(2) . ? 
Li4A C72A 2.14(3) . ? 
O71A C72A 1.025(15) . ? 
C72A N73A 1.28(2) . ? 
N73A C74A 1.18(5) . ? 
N73A C75A 1.72(3) . ? 
O76A C77A 1.221(17) . ? 
C77A N78A 1.312(18) . ? 
N78A C79A 1.460(17) . ? 
N78A C80A 1.47(2) . ? 
O81A C82A 1.208(16) . ? 
C82A N83A 1.342(17) . ? 
N83A C85A 1.448(18) . ? 
N83A C84A 1.495(19) . ? 
O86A C87A 1.211(17) . ? 
C87A N88A 1.329(17) . ? 
N88A C90A 1.374(19) . ? 
N88A C89A 1.46(2) . ? 
N88A C85A 1.699(18) 4_566 ? 
Li4B O81B 1.78(3) . ? 
Li4B O86B 1.88(3) . ? 
Li4B O76B 1.98(3) . ? 
Li4B O71B 1.99(3) . ? 
O71B C72B 1.81(2) . ? 
C72B N73B 1.310(18) . ? 
N73B C75B 1.33(2) . ? 
N73B C74B 1.593(19) . ? 
O76B C77B 1.12(5) . ? 
C77B N78B 1.30(5) . ? 
N78B C80B 1.44(4) . ? 
N78B C79B 1.70(6) . ? 
O81B C82B 1.25(2) . ? 
C82B N83B 1.37(2) . ? 
N83B C85B 1.45(3) . ? 
N83B C84B 1.48(2) . ? 
O86B C87B 1.240(15) . ? 
C87B N88B 1.424(16) . ? 
N88B C89B 1.484(15) . ? 
N88B C90B 1.492(16) . ? 
 
loop_ 
 _geom_angle_atom_site_label_1 
 _geom_angle_atom_site_label_2 
 _geom_angle_atom_site_label_3 
 _geom_angle 
 _geom_angle_site_symmetry_1 
 _geom_angle_site_symmetry_3 
 _geom_angle_publ_flag 
O22 Ti1 O12 93.81(16) . . ? 
O22 Ti1 O32 94.41(18) . . ? 
O12 Ti1 O32 97.33(16) . . ? 
O22 Ti1 O31 163.72(16) . . ? 
O12 Ti1 O31 101.94(16) . . ? 
O32 Ti1 O31 79.60(17) . . ? 
O22 Ti1 O21 79.71(16) . . ? 
O12 Ti1 O21 163.13(17) . . ? 
O32 Ti1 O21 98.68(16) . . ? 
O31 Ti1 O21 86.20(16) . . ? 
O22 Ti1 O11 99.30(17) . . ? 
O12 Ti1 O11 79.72(15) . . ? 
O32 Ti1 O11 166.12(18) . . ? 
O31 Ti1 O11 87.70(16) . . ? 
O21 Ti1 O11 85.93(15) . . ? 
O22 Ti1 Li3 156.9(2) . . ? 
O12 Ti1 Li3 91.7(2) . . ? 
O32 Ti1 Li3 107.1(2) . . ? 
O31 Ti1 Li3 28.3(2) . . ? 
O21 Ti1 Li3 88.7(2) . . ? 
O11 Ti1 Li3 59.7(2) . . ? 
O22 Ti1 Li1 92.6(2) . . ? 
O12 Ti1 Li1 107.3(2) . . ? 
O32 Ti1 Li1 153.9(2) . . ? 
O31 Ti1 Li1 86.7(2) . . ? 
O21 Ti1 Li1 58.0(2) . . ? 
O11 Ti1 Li1 28.0(2) . . ? 
Li3 Ti1 Li1 64.4(2) . . ? 
O62 Ti2 O52 96.04(19) . . ? 
O62 Ti2 O42 94.71(17) . . ? 
O52 Ti2 O42 94.51(18) . . ? 
O62 Ti2 O51 165.25(16) . . ? 
O52 Ti2 O51 80.37(19) . . ? 
O42 Ti2 O51 99.83(17) . . ? 
O62 Ti2 O41 99.53(17) . . ? 
O52 Ti2 O41 163.8(2) . . ? 
O42 Ti2 O41 79.89(16) . . ? 
O51 Ti2 O41 85.60(17) . . ? 
O62 Ti2 O61 79.47(15) . . ? 
O52 Ti2 O61 100.96(17) . . ? 
O42 Ti2 O61 163.93(17) . . ? 
O51 Ti2 O61 87.13(15) . . ? 
O41 Ti2 O61 86.28(15) . . ? 
O62 Ti2 Li2 153.6(2) . . ? 
O52 Ti2 Li2 108.5(2) . . ? 
O42 Ti2 Li2 93.1(2) . . ? 
O51 Ti2 Li2 28.4(2) . . ? 
O41 Ti2 Li2 57.2(2) . . ? 
O61 Ti2 Li2 86.17(19) . . ? 
O11 Li1 O41 133.5(6) . . ? 
O11 Li1 O47 114.4(5) . . ? 
O41 Li1 O47 95.5(4) . . ? 
O11 Li1 O17 95.5(5) . . ? 
O41 Li1 O17 114.0(5) . . ? 
O47 Li1 O17 100.2(5) . . ? 
O11 Li1 Ti1 29.9(2) . . ? 
O41 Li1 Ti1 113.7(5) . . ? 
O47 Li1 Ti1 100.8(4) . . ? 
O17 Li1 Ti1 125.1(4) . . ? 
O51 Li2 O27 116.7(5) . . ? 
O51 Li2 O21 134.2(6) . . ? 
O27 Li2 O21 94.7(6) . . ? 
O51 Li2 O57 94.1(6) . . ? 
O27 Li2 O57 98.6(5) . . ? 
O21 Li2 O57 114.4(6) . . ? 
O51 Li2 Ti2 29.6(2) . . ? 
O27 Li2 Ti2 104.7(4) . . ? 
O21 Li2 Ti2 114.1(4) . . ? 
O57 Li2 Ti2 123.4(5) . . ? 
O31 Li3 O61 130.3(6) . . ? 
O31 Li3 O67 114.1(6) . . ? 
O61 Li3 O67 95.8(5) . . ? 
O31 Li3 O37 95.6(5) . . ? 
O61 Li3 O37 112.9(6) . . ? 
O67 Li3 O37 107.2(6) . . ? 
O31 Li3 Ti1 30.0(3) . . ? 
O61 Li3 Ti1 111.8(5) . . ? 
O67 Li3 Ti1 97.7(4) . . ? 
O37 Li3 Ti1 125.3(5) . . ? 
C11 O11 Li1 122.3(5) . . ? 
C11 O11 Ti1 112.5(3) . . ? 
Li1 O11 Ti1 122.1(4) . . ? 
C12 O12 Ti1 116.8(3) . . ? 
O11 C11 C12 114.3(5) . . ? 
O11 C11 C16 126.1(5) . . ? 
C12 C11 C16 119.6(5) . . ? 
O12 C12 C13 123.8(5) . . ? 
O12 C12 C11 115.4(4) . . ? 
C13 C12 C11 120.8(5) . . ? 
C12 C13 C14 119.6(5) . . ? 
C15 C14 C13 119.7(6) . . ? 
C14 C15 C16 121.3(6) . . ? 
C15 C16 C11 119.0(5) . . ? 
C15 C16 C17 117.7(6) . . ? 
C11 C16 C17 123.2(6) . . ? 
O17 C17 C16 126.0(6) . . ? 
C17 O17 Li1 125.4(5) . . ? 
C21 O21 Li2 123.0(4) . . ? 
C21 O21 Ti1 112.5(3) . . ? 
Li2 O21 Ti1 122.1(4) . . ? 
C22 O22 Ti1 117.3(3) . . ? 
O21 C21 C22 115.8(4) . . ? 
O21 C21 C26 125.6(5) . . ? 
C22 C21 C26 118.6(5) . . ? 
O22 C22 C23 123.8(5) . . ? 
O22 C22 C21 113.8(5) . . ? 
C23 C22 C21 122.4(5) . . ? 
C22 C23 C24 118.4(6) . . ? 
C25 C24 C23 120.9(6) . . ? 
C24 C25 C26 121.4(5) . . ? 
C25 C26 C21 118.3(5) . . ? 
C25 C26 C27 118.7(5) . . ? 
C21 C26 C27 123.0(6) . . ? 
O27 C27 C26 127.1(5) . . ? 
C27 O27 Li2 125.2(5) . . ? 
C31 O31 Li3 121.8(5) . . ? 
C31 O31 Ti1 114.6(4) . . ? 
Li3 O31 Ti1 121.7(4) . . ? 
C32 O32 Ti1 117.6(4) . . ? 
O31 C31 C36 126.4(6) . . ? 
O31 C31 C32 113.8(6) . . ? 
C36 C31 C32 119.8(5) . . ? 
O32 C32 C33 124.7(6) . . ? 
O32 C32 C31 114.5(5) . . ? 
C33 C32 C31 120.9(6) . . ? 
C32 C33 C34 118.6(6) . . ? 
C35 C34 C33 121.2(6) . . ? 
C34 C35 C36 121.0(6) . . ? 
C31 C36 C35 118.5(6) . . ? 
C31 C36 C37 123.2(6) . . ? 
C35 C36 C37 118.1(6) . . ? 
O37 C37 C36 127.0(7) . . ? 
C37 O37 Li3 125.1(6) . . ? 
C41 O41 Li1 122.5(5) . . ? 
C41 O41 Ti2 112.8(3) . . ? 
Li1 O41 Ti2 123.0(3) . . ? 
C42 O42 Ti2 117.0(3) . . ? 
O41 C41 C42 115.0(5) . . ? 
O41 C41 C46 125.2(5) . . ? 
C42 C41 C46 119.8(5) . . ? 
O42 C42 C41 115.1(5) . . ? 
O42 C42 C43 124.0(5) . . ? 
C41 C42 C43 120.9(6) . . ? 
C44 C43 C42 119.2(6) . . ? 
C45 C44 C43 121.0(6) . . ? 
C44 C45 C46 120.7(6) . . ? 
C45 C46 C41 118.4(6) . . ? 
C45 C46 C47 117.8(6) . . ? 
C41 C46 C47 123.8(5) . . ? 
O47 C47 C46 127.2(6) . . ? 
C47 O47 Li1 124.6(5) . . ? 
C51 O51 Li2 122.9(5) . . ? 
C51 O51 Ti2 112.8(4) . . ? 
Li2 O51 Ti2 122.0(4) . . ? 
C52 O52 Ti2 116.6(4) . . ? 
O51 C51 C56 126.1(7) . . ? 
O51 C51 C52 114.9(6) . . ? 
C56 C51 C52 119.0(7) . . ? 
O52 C52 C53 125.3(7) . . ? 
O52 C52 C51 114.5(6) . . ? 
C53 C52 C51 120.2(8) . . ? 
C52 C53 C54 119.4(9) . . ? 
C55 C54 C53 120.6(8) . . ? 
C54 C55 C56 121.7(9) . . ? 
C51 C56 C55 119.1(8) . . ? 
C51 C56 C57 122.5(7) . . ? 
C55 C56 C57 118.4(8) . . ? 
O57 C57 C56 128.6(8) . . ? 
C57 O57 Li2 124.2(6) . . ? 
C61 O61 Li3 122.0(4) . . ? 
C61 O61 Ti2 113.6(3) . . ? 
Li3 O61 Ti2 123.7(4) . . ? 
C62 O62 Ti2 118.3(3) . . ? 
O61 C61 C66 125.9(5) . . ? 
O61 C61 C62 114.3(5) . . ? 
C66 C61 C62 119.8(5) . . ? 
O62 C62 C63 124.9(5) . . ? 
O62 C62 C61 114.4(5) . . ? 
C63 C62 C61 120.7(5) . . ? 
C62 C63 C64 119.3(5) . . ? 
C65 C64 C63 120.3(6) . . ? 
C64 C65 C66 121.3(6) . . ? 
C61 C66 C65 118.5(5) . . ? 
C61 C66 C67 123.9(5) . . ? 
C65 C66 C67 117.6(5) . . ? 
O67 C67 C66 126.5(5) . . ? 
C67 O67 Li3 125.0(5) . . ? 
O76A Li4A O86A 107.8(11) . . ? 
O76A Li4A O81A 115.2(12) . . ? 
O86A Li4A O81A 114.0(12) . . ? 
O76A Li4A O71A 104.9(12) . . ? 
O86A Li4A O71A 109.4(11) . . ? 
O81A Li4A O71A 105.0(11) . . ? 
O76A Li4A C72A 76.5(9) . . ? 
O86A Li4A C72A 118.9(12) . . ? 
O81A Li4A C72A 118.2(11) . . ? 
O71A Li4A C72A 28.4(6) . . ? 
C72A O71A Li4A 85.0(13) . . ? 
O71A C72A N73A 124.6(17) . . ? 
O71A C72A Li4A 66.5(12) . . ? 
N73A C72A Li4A 124.0(15) . . ? 
C74A N73A C72A 136(3) . . ? 
C74A N73A C75A 108(3) . . ? 
C72A N73A C75A 115.3(17) . . ? 
C77A O76A Li4A 129.2(13) . . ? 
O76A C77A N78A 123.5(14) . . ? 
C77A N78A C79A 123.1(12) . . ? 
C77A N78A C80A 118.0(13) . . ? 
C79A N78A C80A 118.8(13) . . ? 
C82A O81A Li4A 130.6(12) . . ? 
O81A C82A N83A 124.9(13) . . ? 
C82A N83A C85A 120.3(11) . . ? 
C82A N83A C84A 125.0(12) . . ? 
C85A N83A C84A 114.6(12) . . ? 
C87A O86A Li4A 128.3(12) . . ? 
O86A C87A N88A 125.0(14) . . ? 
C87A N88A C90A 122.9(14) . . ? 
C87A N88A C89A 120.6(14) . . ? 
C90A N88A C89A 116.3(14) . . ? 
C87A N88A C85A 137.9(12) . 4_566 ? 
C90A N88A C85A 92.9(11) . 4_566 ? 
C89A N88A C85A 36.7(10) . 4_566 ? 
O81B Li4B O86B 115.9(15) . . ? 
O81B Li4B O76B 104.9(15) . . ? 
O86B Li4B O76B 107.6(15) . . ? 
O81B Li4B O71B 109.6(15) . . ? 
O86B Li4B O71B 111.1(14) . . ? 
O76B Li4B O71B 107.1(14) . . ? 
C72B O71B Li4B 150.0(11) . . ? 
N73B C72B O71B 112.3(12) . . ? 
C72B N73B C75B 128.7(14) . . ? 
C72B N73B C74B 116.0(12) . . ? 
C75B N73B C74B 114.4(13) . . ? 
C77B O76B Li4B 130(3) . . ? 
O76B C77B N78B 136(5) . . ? 
C77B N78B C80B 117(3) . . ? 
C77B N78B C79B 131(3) . . ? 
C80B N78B C79B 111(3) . . ? 
C82B O81B Li4B 172.2(19) . . ? 
O81B C82B N83B 123.9(19) . . ? 
C82B N83B C85B 124.5(18) . . ? 
C82B N83B C84B 122.0(16) . . ? 
C85B N83B C84B 113.4(17) . . ? 
C87B O86B Li4B 157.2(13) . . ? 
O86B C87B N88B 125.5(12) . . ? 
C87B N88B C89B 123.5(10) . . ? 
C87B N88B C90B 126.4(10) . . ? 
C89B N88B C90B 109.8(10) . . ? 
 
loop_ 
 _geom_torsion_atom_site_label_1 
 _geom_torsion_atom_site_label_2 
 _geom_torsion_atom_site_label_3 
 _geom_torsion_atom_site_label_4 
 _geom_torsion 
 _geom_torsion_site_symmetry_1 
 _geom_torsion_site_symmetry_2 
 _geom_torsion_site_symmetry_3 
 _geom_torsion_site_symmetry_4 
 _geom_torsion_publ_flag 
O22 Ti1 Li1 O11 105.0(4) . . . . ? 
O12 Ti1 Li1 O11 10.2(5) . . . . ? 
O32 Ti1 Li1 O11 -149.5(4) . . . . ? 
O31 Ti1 Li1 O11 -91.3(4) . . . . ? 
O21 Ti1 Li1 O11 -178.9(5) . . . . ? 
Li3 Ti1 Li1 O11 -73.2(4) . . . . ? 
O22 Ti1 Li1 O41 -116.8(4) . . . . ? 
O12 Ti1 Li1 O41 148.3(4) . . . . ? 
O32 Ti1 Li1 O41 -11.3(8) . . . . ? 
O31 Ti1 Li1 O41 46.9(4) . . . . ? 
O21 Ti1 Li1 O41 -40.7(4) . . . . ? 
O11 Ti1 Li1 O41 138.1(7) . . . . ? 
Li3 Ti1 Li1 O41 64.9(4) . . . . ? 
O22 Ti1 Li1 O47 -15.9(4) . . . . ? 
O12 Ti1 Li1 O47 -110.7(4) . . . . ? 
O32 Ti1 Li1 O47 89.7(6) . . . . ? 
O31 Ti1 Li1 O47 147.8(4) . . . . ? 
O21 Ti1 Li1 O47 60.3(4) . . . . ? 
O11 Ti1 Li1 O47 -120.9(6) . . . . ? 
Li3 Ti1 Li1 O47 165.9(5) . . . . ? 
O22 Ti1 Li1 O17 94.9(5) . . . . ? 
O12 Ti1 Li1 O17 0.0(6) . . . . ? 
O32 Ti1 Li1 O17 -159.6(4) . . . . ? 
O31 Ti1 Li1 O17 -101.4(5) . . . . ? 
O21 Ti1 Li1 O17 171.0(6) . . . . ? 
O11 Ti1 Li1 O17 -10.2(3) . . . . ? 
Li3 Ti1 Li1 O17 -83.4(5) . . . . ? 
O62 Ti2 Li2 O51 -147.9(4) . . . . ? 
O52 Ti2 Li2 O51 9.2(4) . . . . ? 
O42 Ti2 Li2 O51 105.0(4) . . . . ? 
O41 Ti2 Li2 O51 -179.1(5) . . . . ? 
O61 Ti2 Li2 O51 -91.0(4) . . . . ? 
O62 Ti2 Li2 O27 93.6(5) . . . . ? 
O52 Ti2 Li2 O27 -109.2(4) . . . . ? 
O42 Ti2 Li2 O27 -13.4(4) . . . . ? 
O51 Ti2 Li2 O27 -118.4(6) . . . . ? 
O41 Ti2 Li2 O27 62.5(4) . . . . ? 
O61 Ti2 Li2 O27 150.5(4) . . . . ? 
O62 Ti2 Li2 O21 -8.5(8) . . . . ? 
O52 Ti2 Li2 O21 148.7(4) . . . . ? 
O42 Ti2 Li2 O21 -115.5(5) . . . . ? 
O51 Ti2 Li2 O21 139.4(7) . . . . ? 
O41 Ti2 Li2 O21 -39.7(4) . . . . ? 
O61 Ti2 Li2 O21 48.4(5) . . . . ? 
O62 Ti2 Li2 O57 -155.3(4) . . . . ? 
O52 Ti2 Li2 O57 1.9(5) . . . . ? 
O42 Ti2 Li2 O57 97.7(5) . . . . ? 
O51 Ti2 Li2 O57 -7.3(3) . . . . ? 
O41 Ti2 Li2 O57 173.6(6) . . . . ? 
O61 Ti2 Li2 O57 -98.4(5) . . . . ? 
O22 Ti1 Li3 O31 -143.7(4) . . . . ? 
O12 Ti1 Li3 O31 112.4(4) . . . . ? 
O32 Ti1 Li3 O31 14.2(4) . . . . ? 
O21 Ti1 Li3 O31 -84.5(4) . . . . ? 
O11 Ti1 Li3 O31 -170.5(5) . . . . ? 
Li1 Ti1 Li3 O31 -139.2(5) . . . . ? 
O22 Ti1 Li3 O61 -9.3(9) . . . . ? 
O12 Ti1 Li3 O61 -113.2(4) . . . . ? 
O32 Ti1 Li3 O61 148.6(4) . . . . ? 
O31 Ti1 Li3 O61 134.4(7) . . . . ? 
O21 Ti1 Li3 O61 49.9(4) . . . . ? 
O11 Ti1 Li3 O61 -36.1(4) . . . . ? 
Li1 Ti1 Li3 O61 -4.8(4) . . . . ? 
O22 Ti1 Li3 O67 90.2(6) . . . . ? 
O12 Ti1 Li3 O67 -13.7(4) . . . . ? 
O32 Ti1 Li3 O67 -111.9(4) . . . . ? 
O31 Ti1 Li3 O67 -126.1(6) . . . . ? 
O21 Ti1 Li3 O67 149.4(4) . . . . ? 
O11 Ti1 Li3 O67 63.4(4) . . . . ? 
Li1 Ti1 Li3 O67 94.7(4) . . . . ? 
O22 Ti1 Li3 O37 -152.3(4) . . . . ? 
O12 Ti1 Li3 O37 103.9(5) . . . . ? 
O32 Ti1 Li3 O37 5.6(6) . . . . ? 
O31 Ti1 Li3 O37 -8.6(3) . . . . ? 
O21 Ti1 Li3 O37 -93.0(5) . . . . ? 
O11 Ti1 Li3 O37 -179.1(6) . . . . ? 
Li1 Ti1 Li3 O37 -147.8(6) . . . . ? 
O41 Li1 O11 C11 144.1(7) . . . . ? 
O47 Li1 O11 C11 -90.7(7) . . . . ? 
O17 Li1 O11 C11 13.1(7) . . . . ? 
Ti1 Li1 O11 C11 -158.5(6) . . . . ? 
O41 Li1 O11 Ti1 -57.4(9) . . . . ? 
O47 Li1 O11 Ti1 67.8(7) . . . . ? 
O17 Li1 O11 Ti1 171.7(3) . . . . ? 
O22 Ti1 O11 C11 82.5(3) . . . . ? 
O12 Ti1 O11 C11 -9.7(3) . . . . ? 
O32 Ti1 O11 C11 -88.6(7) . . . . ? 
O31 Ti1 O11 C11 -112.3(3) . . . . ? 
O21 Ti1 O11 C11 161.4(4) . . . . ? 
Li3 Ti1 O11 C11 -107.8(4) . . . . ? 
Li1 Ti1 O11 C11 160.4(6) . . . . ? 
O22 Ti1 O11 Li1 -77.9(4) . . . . ? 
O12 Ti1 O11 Li1 -170.1(4) . . . . ? 
O32 Ti1 O11 Li1 111.0(7) . . . . ? 
O31 Ti1 O11 Li1 87.3(4) . . . . ? 
O21 Ti1 O11 Li1 1.0(4) . . . . ? 
Li3 Ti1 O11 Li1 91.8(5) . . . . ? 
O22 Ti1 O12 C12 -88.9(4) . . . . ? 
O32 Ti1 O12 C12 176.1(4) . . . . ? 
O31 Ti1 O12 C12 95.2(4) . . . . ? 
O21 Ti1 O12 C12 -22.4(8) . . . . ? 
O11 Ti1 O12 C12 9.8(4) . . . . ? 
Li3 Ti1 O12 C12 68.6(4) . . . . ? 
Li1 Ti1 O12 C12 5.0(4) . . . . ? 
Li1 O11 C11 C12 168.4(5) . . . . ? 
Ti1 O11 C11 C12 8.1(6) . . . . ? 
Li1 O11 C11 C16 -10.8(8) . . . . ? 
Ti1 O11 C11 C16 -171.2(5) . . . . ? 
Ti1 O12 C12 C13 171.1(4) . . . . ? 
Ti1 O12 C12 C11 -8.4(6) . . . . ? 
O11 C11 C12 O12 -0.3(7) . . . . ? 
C16 C11 C12 O12 179.0(5) . . . . ? 
O11 C11 C12 C13 -179.9(5) . . . . ? 
C16 C11 C12 C13 -0.6(8) . . . . ? 
O12 C12 C13 C14 179.7(5) . . . . ? 
C11 C12 C13 C14 -0.8(9) . . . . ? 
C12 C13 C14 C15 0.9(9) . . . . ? 
C13 C14 C15 C16 0.3(10) . . . . ? 
C14 C15 C16 C11 -1.6(10) . . . . ? 
C14 C15 C16 C17 178.5(6) . . . . ? 
O11 C11 C16 C15 -179.0(6) . . . . ? 
C12 C11 C16 C15 1.8(9) . . . . ? 
O11 C11 C16 C17 0.9(9) . . . . ? 
C12 C11 C16 C17 -178.3(6) . . . . ? 
C15 C16 C17 O17 -177.1(6) . . . . ? 
C11 C16 C17 O17 3.0(11) . . . . ? 
C16 C17 O17 Li1 4.0(10) . . . . ? 
O11 Li1 O17 C17 -10.4(8) . . . . ? 
O41 Li1 O17 C17 -153.5(6) . . . . ? 
O47 Li1 O17 C17 105.7(6) . . . . ? 
Ti1 Li1 O17 C17 -5.3(9) . . . . ? 
O51 Li2 O21 C21 147.4(7) . . . . ? 
O27 Li2 O21 C21 12.4(7) . . . . ? 
O57 Li2 O21 C21 -89.3(7) . . . . ? 
Ti2 Li2 O21 C21 120.8(5) . . . . ? 
O51 Li2 O21 Ti1 -51.6(10) . . . . ? 
O27 Li2 O21 Ti1 173.3(3) . . . . ? 
O57 Li2 O21 Ti1 71.6(6) . . . . ? 
Ti2 Li2 O21 Ti1 -78.2(5) . . . . ? 
O22 Ti1 O21 C21 -8.2(4) . . . . ? 
O12 Ti1 O21 C21 -76.7(7) . . . . ? 
O32 Ti1 O21 C21 84.8(4) . . . . ? 
O31 Ti1 O21 C21 163.6(4) . . . . ? 
O11 Ti1 O21 C21 -108.4(4) . . . . ? 
Li3 Ti1 O21 C21 -168.1(4) . . . . ? 
Li1 Ti1 O21 C21 -107.9(4) . . . . ? 
O22 Ti1 O21 Li2 -170.9(5) . . . . ? 
O12 Ti1 O21 Li2 120.6(7) . . . . ? 
O32 Ti1 O21 Li2 -78.0(5) . . . . ? 
O31 Ti1 O21 Li2 0.9(4) . . . . ? 
O11 Ti1 O21 Li2 88.8(4) . . . . ? 
Li3 Ti1 O21 Li2 29.1(5) . . . . ? 
Li1 Ti1 O21 Li2 89.4(5) . . . . ? 
O12 Ti1 O22 C22 172.6(4) . . . . ? 
O32 Ti1 O22 C22 -89.7(4) . . . . ? 
O31 Ti1 O22 C22 -22.2(8) . . . . ? 
O21 Ti1 O22 C22 8.3(4) . . . . ? 
O11 Ti1 O22 C22 92.4(4) . . . . ? 
Li3 Ti1 O22 C22 69.2(7) . . . . ? 
Li1 Ti1 O22 C22 65.1(4) . . . . ? 
Li2 O21 C21 C22 169.4(5) . . . . ? 
Ti1 O21 C21 C22 6.8(6) . . . . ? 
Li2 O21 C21 C26 -9.7(9) . . . . ? 
Ti1 O21 C21 C26 -172.3(5) . . . . ? 
Ti1 O22 C22 C23 173.9(5) . . . . ? 
Ti1 O22 C22 C21 -7.1(6) . . . . ? 
O21 C21 C22 O22 -0.3(7) . . . . ? 
C26 C21 C22 O22 178.8(5) . . . . ? 
O21 C21 C22 C23 178.7(5) . . . . ? 
C26 C21 C22 C23 -2.2(9) . . . . ? 
O22 C22 C23 C24 -179.1(5) . . . . ? 
C21 C22 C23 C24 2.0(9) . . . . ? 
C22 C23 C24 C25 -1.1(10) . . . . ? 
C23 C24 C25 C26 0.3(11) . . . . ? 
C24 C25 C26 C21 -0.5(10) . . . . ? 
C24 C25 C26 C27 179.1(6) . . . . ? 
O21 C21 C26 C25 -179.7(6) . . . . ? 
C22 C21 C26 C25 1.3(9) . . . . ? 
O21 C21 C26 C27 0.8(9) . . . . ? 
C22 C21 C26 C27 -178.2(6) . . . . ? 
C25 C26 C27 O27 -177.9(7) . . . . ? 
C21 C26 C27 O27 1.6(11) . . . . ? 
C26 C27 O27 Li2 5.6(11) . . . . ? 
O51 Li2 O27 C27 -156.1(6) . . . . ? 
O21 Li2 O27 C27 -10.7(8) . . . . ? 
O57 Li2 O27 C27 104.9(7) . . . . ? 
Ti2 Li2 O27 C27 -127.1(6) . . . . ? 
O61 Li3 O31 C31 136.4(7) . . . . ? 
O67 Li3 O31 C31 -101.8(7) . . . . ? 
O37 Li3 O31 C31 9.9(6) . . . . ? 
Ti1 Li3 O31 C31 -163.1(6) . . . . ? 
O61 Li3 O31 Ti1 -60.5(9) . . . . ? 
O67 Li3 O31 Ti1 61.3(7) . . . . ? 
O37 Li3 O31 Ti1 173.0(3) . . . . ? 
O22 Ti1 O31 C31 -71.5(7) . . . . ? 
O12 Ti1 O31 C31 93.5(3) . . . . ? 
O32 Ti1 O31 C31 -1.9(3) . . . . ? 
O21 Ti1 O31 C31 -101.5(3) . . . . ? 
O11 Ti1 O31 C31 172.4(3) . . . . ? 
Li3 Ti1 O31 C31 164.3(6) . . . . ? 
Li1 Ti1 O31 C31 -159.6(4) . . . . ? 
O22 Ti1 O31 Li3 124.3(6) . . . . ? 
O12 Ti1 O31 Li3 -70.8(4) . . . . ? 
O32 Ti1 O31 Li3 -166.2(4) . . . . ? 
O21 Ti1 O31 Li3 94.3(4) . . . . ? 
O11 Ti1 O31 Li3 8.2(4) . . . . ? 
Li1 Ti1 O31 Li3 36.2(4) . . . . ? 
O22 Ti1 O32 C32 165.8(3) . . . . ? 
O12 Ti1 O32 C32 -99.8(4) . . . . ? 
O31 Ti1 O32 C32 1.1(3) . . . . ? 
O21 Ti1 O32 C32 85.5(4) . . . . ? 
O11 Ti1 O32 C32 -23.0(8) . . . . ? 
Li3 Ti1 O32 C32 -5.7(4) . . . . ? 
Li1 Ti1 O32 C32 60.7(6) . . . . ? 
Li3 O31 C31 C36 -11.5(7) . . . . ? 
Ti1 O31 C31 C36 -175.8(4) . . . . ? 
Li3 O31 C31 C32 166.7(5) . . . . ? 
Ti1 O31 C31 C32 2.4(5) . . . . ? 
Ti1 O32 C32 C33 178.6(4) . . . . ? 
Ti1 O32 C32 C31 -0.1(6) . . . . ? 
O31 C31 C32 O32 -1.6(6) . . . . ? 
C36 C31 C32 O32 176.7(4) . . . . ? 
O31 C31 C32 C33 179.7(4) . . . . ? 
C36 C31 C32 C33 -2.0(8) . . . . ? 
O32 C32 C33 C34 -177.2(5) . . . . ? 
C31 C32 C33 C34 1.4(8) . . . . ? 
C32 C33 C34 C35 -0.4(8) . . . . ? 
C33 C34 C35 C36 0.0(9) . . . . ? 
O31 C31 C36 C35 179.6(5) . . . . ? 
C32 C31 C36 C35 1.6(7) . . . . ? 
O31 C31 C36 C37 4.4(8) . . . . ? 
C32 C31 C36 C37 -173.7(5) . . . . ? 
C34 C35 C36 C31 -0.6(8) . . . . ? 
C34 C35 C36 C37 174.9(5) . . . . ? 
C31 C36 C37 O37 3.2(9) . . . . ? 
C35 C36 C37 O37 -172.1(6) . . . . ? 
C36 C37 O37 Li3 -1.8(9) . . . . ? 
O31 Li3 O37 C37 -3.9(7) . . . . ? 
O61 Li3 O37 C37 -142.2(6) . . . . ? 
O67 Li3 O37 C37 113.5(6) . . . . ? 
Ti1 Li3 O37 C37 0.4(8) . . . . ? 
O11 Li1 O41 C41 143.4(7) . . . . ? 
O47 Li1 O41 C41 11.8(7) . . . . ? 
O17 Li1 O41 C41 -92.0(6) . . . . ? 
Ti1 Li1 O41 C41 116.1(5) . . . . ? 
O11 Li1 O41 Ti2 -52.2(10) . . . . ? 
O47 Li1 O41 Ti2 176.1(3) . . . . ? 
O17 Li1 O41 Ti2 72.3(6) . . . . ? 
Ti1 Li1 O41 Ti2 -79.6(5) . . . . ? 
O62 Ti2 O41 C41 90.3(4) . . . . ? 
O52 Ti2 O41 C41 -73.7(7) . . . . ? 
O42 Ti2 O41 C41 -2.8(4) . . . . ? 
O51 Ti2 O41 C41 -103.6(4) . . . . ? 
O61 Ti2 O41 C41 169.0(4) . . . . ? 
Li2 Ti2 O41 C41 -103.2(4) . . . . ? 
O62 Ti2 O41 Li1 -75.4(5) . . . . ? 
O52 Ti2 O41 Li1 120.6(7) . . . . ? 
O42 Ti2 O41 Li1 -168.5(5) . . . . ? 
O51 Ti2 O41 Li1 90.7(5) . . . . ? 
O61 Ti2 O41 Li1 3.3(5) . . . . ? 
Li2 Ti2 O41 Li1 91.1(5) . . . . ? 
O62 Ti2 O42 C42 -96.0(4) . . . . ? 
O52 Ti2 O42 C42 167.6(4) . . . . ? 
O51 Ti2 O42 C42 86.6(4) . . . . ? 
O41 Ti2 O42 C42 2.9(4) . . . . ? 
O61 Ti2 O42 C42 -28.1(9) . . . . ? 
Li2 Ti2 O42 C42 58.8(4) . . . . ? 
Li1 O41 C41 C42 168.1(5) . . . . ? 
Ti2 O41 C41 C42 2.3(6) . . . . ? 
Li1 O41 C41 C46 -12.1(9) . . . . ? 
Ti2 O41 C41 C46 -177.9(5) . . . . ? 
Ti2 O42 C42 C41 -2.5(6) . . . . ? 
Ti2 O42 C42 C43 178.3(5) . . . . ? 
O41 C41 C42 O42 0.0(7) . . . . ? 
C46 C41 C42 O42 -179.8(5) . . . . ? 
O41 C41 C42 C43 179.2(5) . . . . ? 
C46 C41 C42 C43 -0.6(9) . . . . ? 
O42 C42 C43 C44 178.9(6) . . . . ? 
C41 C42 C43 C44 -0.2(9) . . . . ? 
C42 C43 C44 C45 0.2(10) . . . . ? 
C43 C44 C45 C46 0.5(10) . . . . ? 
C44 C45 C46 C41 -1.3(9) . . . . ? 
C44 C45 C46 C47 177.3(6) . . . . ? 
O41 C41 C46 C45 -178.4(5) . . . . ? 
C42 C41 C46 C45 1.3(8) . . . . ? 
O41 C41 C46 C47 3.0(9) . . . . ? 
C42 C41 C46 C47 -177.2(5) . . . . ? 
C45 C46 C47 O47 -174.0(6) . . . . ? 
C41 C46 C47 O47 4.5(10) . . . . ? 
C46 C47 O47 Li1 -1.3(10) . . . . ? 
O11 Li1 O47 C47 -149.1(6) . . . . ? 
O41 Li1 O47 C47 -5.6(8) . . . . ? 
O17 Li1 O47 C47 110.1(6) . . . . ? 
Ti1 Li1 O47 C47 -121.0(5) . . . . ? 
O27 Li2 O51 C51 -89.4(7) . . . . ? 
O21 Li2 O51 C51 142.6(7) . . . . ? 
O57 Li2 O51 C51 12.4(6) . . . . ? 
Ti2 Li2 O51 C51 -161.5(6) . . . . ? 
O27 Li2 O51 Ti2 72.1(7) . . . . ? 
O21 Li2 O51 Ti2 -55.9(9) . . . . ? 
O57 Li2 O51 Ti2 173.9(3) . . . . ? 
O62 Ti2 O51 C51 -84.9(7) . . . . ? 
O52 Ti2 O51 C51 -7.9(3) . . . . ? 
O42 Ti2 O51 C51 85.0(4) . . . . ? 
O41 Ti2 O51 C51 164.0(4) . . . . ? 
O61 Ti2 O51 C51 -109.6(4) . . . . ? 
Li2 Ti2 O51 C51 163.2(6) . . . . ? 
O62 Ti2 O51 Li2 111.9(7) . . . . ? 
O52 Ti2 O51 Li2 -171.1(4) . . . . ? 
O42 Ti2 O51 Li2 -78.2(4) . . . . ? 
O41 Ti2 O51 Li2 0.8(4) . . . . ? 
O61 Ti2 O51 Li2 87.3(4) . . . . ? 
O62 Ti2 O52 C52 173.5(4) . . . . ? 
O42 Ti2 O52 C52 -91.3(4) . . . . ? 
O51 Ti2 O52 C52 8.0(4) . . . . ? 
O41 Ti2 O52 C52 -22.3(8) . . . . ? 
O61 Ti2 O52 C52 93.1(4) . . . . ? 
Li2 Ti2 O52 C52 3.5(4) . . . . ? 
Li2 O51 C51 C56 -10.1(8) . . . . ? 
Ti2 O51 C51 C56 -173.1(5) . . . . ? 
Li2 O51 C51 C52 169.7(5) . . . . ? 
Ti2 O51 C51 C52 6.6(6) . . . . ? 
Ti2 O52 C52 C53 173.9(5) . . . . ? 
Ti2 O52 C52 C51 -6.7(6) . . . . ? 
O51 C51 C52 O52 -0.4(7) . . . . ? 
C56 C51 C52 O52 179.4(5) . . . . ? 
O51 C51 C52 C53 179.1(5) . . . . ? 
C56 C51 C52 C53 -1.2(9) . . . . ? 
O52 C52 C53 C54 179.6(6) . . . . ? 
C51 C52 C53 C54 0.2(10) . . . . ? 
C52 C53 C54 C55 1.2(11) . . . . ? 
C53 C54 C55 C56 -1.6(12) . . . . ? 
O51 C51 C56 C55 -179.5(6) . . . . ? 
C52 C51 C56 C55 0.8(9) . . . . ? 
O51 C51 C56 C57 2.6(9) . . . . ? 
C52 C51 C56 C57 -177.1(6) . . . . ? 
C54 C55 C56 C51 0.6(10) . . . . ? 
C54 C55 C56 C57 178.6(7) . . . . ? 
C51 C56 C57 O57 -2.0(11) . . . . ? 
C55 C56 C57 O57 -180.0(7) . . . . ? 
C56 C57 O57 Li2 9.0(11) . . . . ? 
O51 Li2 O57 C57 -12.1(7) . . . . ? 
O27 Li2 O57 C57 105.6(7) . . . . ? 
O21 Li2 O57 C57 -155.2(6) . . . . ? 
Ti2 Li2 O57 C57 -8.5(8) . . . . ? 
O31 Li3 O61 C61 135.8(7) . . . . ? 
O67 Li3 O61 C61 7.1(8) . . . . ? 
O37 Li3 O61 C61 -104.4(6) . . . . ? 
Ti1 Li3 O61 C61 107.9(5) . . . . ? 
O31 Li3 O61 Ti2 -54.7(10) . . . . ? 
O67 Li3 O61 Ti2 176.6(3) . . . . ? 
O37 Li3 O61 Ti2 65.1(7) . . . . ? 
Ti1 Li3 O61 Ti2 -82.6(5) . . . . ? 
O62 Ti2 O61 C61 1.3(3) . . . . ? 
O52 Ti2 O61 C61 95.4(4) . . . . ? 
O42 Ti2 O61 C61 -68.6(7) . . . . ? 
O51 Ti2 O61 C61 175.1(4) . . . . ? 
O41 Ti2 O61 C61 -99.2(4) . . . . ? 
Li2 Ti2 O61 C61 -156.5(4) . . . . ? 
O62 Ti2 O61 Li3 -169.0(5) . . . . ? 
O52 Ti2 O61 Li3 -74.8(5) . . . . ? 
O42 Ti2 O61 Li3 121.1(7) . . . . ? 
O51 Ti2 O61 Li3 4.8(5) . . . . ? 
O41 Ti2 O61 Li3 90.5(5) . . . . ? 
Li2 Ti2 O61 Li3 33.3(5) . . . . ? 
O52 Ti2 O62 C62 -102.0(4) . . . . ? 
O42 Ti2 O62 C62 163.0(4) . . . . ? 
O51 Ti2 O62 C62 -27.0(9) . . . . ? 
O41 Ti2 O62 C62 82.4(4) . . . . ? 
O61 Ti2 O62 C62 -1.9(4) . . . . ? 
Li2 Ti2 O62 C62 56.3(6) . . . . ? 
Li3 O61 C61 C66 -9.9(8) . . . . ? 
Ti2 O61 C61 C66 179.7(4) . . . . ? 
Li3 O61 C61 C62 170.0(6) . . . . ? 
Ti2 O61 C61 C62 -0.4(6) . . . . ? 
Ti2 O62 C62 C63 -175.9(4) . . . . ? 
Ti2 O62 C62 C61 2.3(6) . . . . ? 
O61 C61 C62 O62 -1.1(7) . . . . ? 
C66 C61 C62 O62 178.8(5) . . . . ? 
O61 C61 C62 C63 177.2(5) . . . . ? 
C66 C61 C62 C63 -2.9(8) . . . . ? 
O62 C62 C63 C64 179.0(5) . . . . ? 
C61 C62 C63 C64 0.9(9) . . . . ? 
C62 C63 C64 C65 0.8(10) . . . . ? 
C63 C64 C65 C66 -0.4(10) . . . . ? 
O61 C61 C66 C65 -176.9(5) . . . . ? 
C62 C61 C66 C65 3.2(8) . . . . ? 
O61 C61 C66 C67 4.3(9) . . . . ? 
C62 C61 C66 C67 -175.6(5) . . . . ? 
C64 C65 C66 C61 -1.6(9) . . . . ? 
C64 C65 C66 C67 177.3(6) . . . . ? 
C61 C66 C67 O67 4.4(10) . . . . ? 
C65 C66 C67 O67 -174.5(6) . . . . ? 
C66 C67 O67 Li3 -5.3(10) . . . . ? 
O31 Li3 O67 C67 -139.3(6) . . . . ? 
O61 Li3 O67 C67 0.0(8) . . . . ? 
O37 Li3 O67 C67 116.2(6) . . . . ? 
Ti1 Li3 O67 C67 -113.0(5) . . . . ? 
O76A Li4A O71A C72A -0.4(12) . . . . ? 
O86A Li4A O71A C72A 115.1(13) . . . . ? 
O81A Li4A O71A C72A -122.3(13) . . . . ? 
Li4A O71A C72A N73A -116(2) . . . . ? 
O76A Li4A C72A O71A 179.6(12) . . . . ? 
O86A Li4A C72A O71A -77.3(14) . . . . ? 
O81A Li4A C72A O71A 68.0(14) . . . . ? 
O76A Li4A C72A N73A -63.4(17) . . . . ? 
O86A Li4A C72A N73A 40(2) . . . . ? 
O81A Li4A C72A N73A -175.0(15) . . . . ? 
O71A Li4A C72A N73A 117(2) . . . . ? 
O71A C72A N73A C74A 65(5) . . . . ? 
Li4A C72A N73A C74A -19(5) . . . . ? 
O71A C72A N73A C75A -112(2) . . . . ? 
Li4A C72A N73A C75A 165.1(15) . . . . ? 
O86A Li4A O76A C77A 96.0(17) . . . . ? 
O81A Li4A O76A C77A -33(2) . . . . ? 
O71A Li4A O76A C77A -147.4(14) . . . . ? 
C72A Li4A O76A C77A -147.6(15) . . . . ? 
Li4A O76A C77A N78A -177.5(13) . . . . ? 
O76A C77A N78A C79A -1(2) . . . . ? 
O76A C77A N78A C80A -177.0(15) . . . . ? 
O76A Li4A O81A C82A -20(2) . . . . ? 
O86A Li4A O81A C82A -145.5(13) . . . . ? 
O71A Li4A O81A C82A 94.8(15) . . . . ? 
C72A Li4A O81A C82A 67.6(19) . . . . ? 
Li4A O81A C82A N83A -179.1(13) . . . . ? 
O81A C82A N83A C85A -1(2) . . . . ? 
O81A C82A N83A C84A 175.4(13) . . . . ? 
O76A Li4A O86A C87A -66.5(18) . . . . ? 
O81A Li4A O86A C87A 62.8(19) . . . . ? 
O71A Li4A O86A C87A 179.9(12) . . . . ? 
C72A Li4A O86A C87A -150.6(14) . . . . ? 
Li4A O86A C87A N88A 173.5(13) . . . . ? 
O86A C87A N88A C90A -1(2) . . . . ? 
O86A C87A N88A C89A 172.8(16) . . . . ? 
O86A C87A N88A C85A -144.5(15) . . . 4_566 ? 
O81B Li4B O71B C72B -55(3) . . . . ? 
O86B Li4B O71B C72B 175.5(16) . . . . ? 
O76B Li4B O71B C72B 58(3) . . . . ? 
Li4B O71B C72B N73B -97(2) . . . . ? 
O71B C72B N73B C75B 137.9(17) . . . . ? 
O71B C72B N73B C74B -30.7(16) . . . . ? 
O81B Li4B O76B C77B 137(4) . . . . ? 
O86B Li4B O76B C77B -99(4) . . . . ? 
O71B Li4B O76B C77B 20(4) . . . . ? 
Li4B O76B C77B N78B -160(4) . . . . ? 
O76B C77B N78B C80B 12(8) . . . . ? 
O76B C77B N78B C79B -173(5) . . . . ? 
O86B Li4B O81B C82B -151(13) . . . . ? 
O76B Li4B O81B C82B -32(14) . . . . ? 
O71B Li4B O81B C82B 83(14) . . . . ? 
Li4B O81B C82B N83B 69(14) . . . . ? 
O81B C82B N83B C85B 2(3) . . . . ? 
O81B C82B N83B C84B 178.1(18) . . . . ? 
O81B Li4B O86B C87B 66(4) . . . . ? 
O76B Li4B O86B C87B -51(4) . . . . ? 
O71B Li4B O86B C87B -168(3) . . . . ? 
Li4B O86B C87B N88B -2(4) . . . . ? 
O86B C87B N88B C89B 9.6(19) . . . . ? 
O86B C87B N88B C90B -178.0(12) . . . . ? 
 
_diffrn_measured_fraction_theta_max    0.999 
_diffrn_reflns_theta_full              25.00 
_diffrn_measured_fraction_theta_full   0.999 
_refine_diff_density_max    2.304 
_refine_diff_density_min   -0.580 
_refine_diff_density_rms    0.104 
#==========================================================================
 
data_fro3123 #(Li[Li3(7a)6Ti2]) 
 
_audit_creation_method            SHELXL-97 
_chemical_name_systematic 
; 
 ? 
; 
_chemical_name_common             ? 
_chemical_melting_point           ? 
_chemical_formula_moiety          ? 
_chemical_formula_sum 
 'C60 H66 Li4 N4 O29 Ti2' 
_chemical_formula_weight          1430.72 
 
loop_ 
 _atom_type_symbol 
 _atom_type_description 
 _atom_type_scat_dispersion_real 
 _atom_type_scat_dispersion_imag 
 _atom_type_scat_source 
 'C'  'C'   0.0033   0.0016 
 'International Tables Vol C Tables 4.2.6.8 and 6.1.1.4' 
 'H'  'H'   0.0000   0.0000 
 'International Tables Vol C Tables 4.2.6.8 and 6.1.1.4' 
 'N'  'N'   0.0061   0.0033 
 'International Tables Vol C Tables 4.2.6.8 and 6.1.1.4' 
 'O'  'O'   0.0106   0.0060 
 'International Tables Vol C Tables 4.2.6.8 and 6.1.1.4' 
 'Li'  'Li'  -0.0003   0.0001 
 'International Tables Vol C Tables 4.2.6.8 and 6.1.1.4' 
 'Ti'  'Ti'   0.2776   0.4457 
 'International Tables Vol C Tables 4.2.6.8 and 6.1.1.4' 
 
_symmetry_cell_setting            'monoclinic' 
_symmetry_space_group_name_H-M    'P21/c'
 
loop_ 
 _symmetry_equiv_pos_as_xyz 
 'x, y, z' 
 '-x, y+1/2, -z+1/2' 
 '-x, -y, -z' 
 'x, -y-1/2, z-1/2' 
 
_cell_length_a                    14.530(1) 
_cell_length_b                    21.692(1) 
_cell_length_c                    22.298(1) 
_cell_angle_alpha                 90.00 
_cell_angle_beta                  108.38(1) 
_cell_angle_gamma                 90.00 
_cell_volume                      6669.5(6) 
_cell_formula_units_Z             4 
_cell_measurement_temperature     198(2) 
_cell_measurement_reflns_used     ? 
_cell_measurement_theta_min       ? 
_cell_measurement_theta_max       ? 
 
_exptl_crystal_description        'plate' 
_exptl_crystal_colour             'orange'
_exptl_crystal_size_max           0.40 
_exptl_crystal_size_mid           0.25 
_exptl_crystal_size_min           0.05 
_exptl_crystal_density_meas       ? 
_exptl_crystal_density_diffrn     1.425 
_exptl_crystal_density_method     'not measured' 
_exptl_crystal_F_000              2968 
_exptl_absorpt_coefficient_mu     0.329 
_exptl_absorpt_correction_type    'empirical' 
_exptl_absorpt_correction_T_min   0.8797 
_exptl_absorpt_correction_T_max   0.9838 
_exptl_absorpt_process_details    'SORTAV (Blessing, 1995 & 1997)' 
 
_exptl_special_details 
; 
 ? 
; 
 
_diffrn_ambient_temperature       198(2) 
_diffrn_radiation_wavelength      0.71073 
_diffrn_radiation_type            MoK\a 
_diffrn_radiation_source          'rotating anode Nonius FR591' 
_diffrn_radiation_monochromator   graphite 
_diffrn_measurement_device_type   'Nonius KappaCCD' 
_diffrn_measurement_method        '\w and \f scans'
_diffrn_detector_area_resol_mean  ? 
_diffrn_standards_number          ? 
_diffrn_standards_interval_count  ? 
_diffrn_standards_interval_time   ? 
_diffrn_standards_decay_%         ? 
_diffrn_reflns_number             38983 
_diffrn_reflns_av_R_equivalents   0.0807 
_diffrn_reflns_av_sigmaI/netI     0.0814 
_diffrn_reflns_limit_h_min        -16 
_diffrn_reflns_limit_h_max        17 
_diffrn_reflns_limit_k_min        -25 
_diffrn_reflns_limit_k_max        22 
_diffrn_reflns_limit_l_min        -20 
_diffrn_reflns_limit_l_max        26 
_diffrn_reflns_theta_min          2.14 
_diffrn_reflns_theta_max          25.00 
_reflns_number_total              11730 
_reflns_number_gt                 7368 
_reflns_threshold_expression      >2sigma(I) 
 
_computing_data_collection        'Collect (Nonius B.V., 1998)' 
_computing_cell_refinement        'Collect (Nonius B.V., 1998)'
_computing_data_reduction         'Denzo-SMN (Otwinowski & Minor, 1997)'
_computing_structure_solution     'SHELXS-97 (Sheldrick, 1990)' 
_computing_structure_refinement   'SHELXL-97 (Sheldrick, 1997)' 
_computing_molecular_graphics     'SCHAKAL (Keller, 1997)' 
_computing_publication_material   'SHELXL-97 (Sheldrick, 1997)'
 
_refine_special_details 
; 
 Refinement of F^2^ against ALL reflections.  The weighted R-factor wR and 
 goodness of fit S are based on F^2^, conventional R-factors R are based 
 on F, with F set to zero for negative F^2^. The threshold expression of 
 F^2^ > 2sigma(F^2^) is used only for calculating R-factors(gt) etc. and is 
 not relevant to the choice of reflections for refinement.  R-factors based 
 on F^2^ are statistically about twice as large as those based on F, and R- 
 factors based on ALL data will be even larger. 
 
 Free solvent molecules refined with common isotropic thermal displacement
 parameter for each, second molecule refined with geometrical restraints
 (SAME).
; 
 
_refine_ls_structure_factor_coef  Fsqd  
_refine_ls_matrix_type            full 
_refine_ls_weighting_scheme       calc  
_refine_ls_weighting_details 
 'calc w=1/[\s^2^(Fo^2^)+(0.1304P)^2^+17.2861P] where P=(Fo^2^+2Fc^2^)/3' 
_atom_sites_solution_primary      direct 
_atom_sites_solution_secondary    difmap 
_atom_sites_solution_hydrogens    geom 
_refine_ls_hydrogen_treatment     'riding' 
_refine_ls_extinction_method      none 
_refine_ls_extinction_coef        ? 
_refine_ls_number_reflns          11730 
_refine_ls_number_parameters      854 
_refine_ls_number_restraints      8 
_refine_ls_R_factor_all           0.1379 
_refine_ls_R_factor_gt            0.0872 
_refine_ls_wR_factor_ref          0.2629 
_refine_ls_wR_factor_gt           0.2291 
_refine_ls_goodness_of_fit_ref    1.024 
_refine_ls_restrained_S_all       1.024 
_refine_ls_shift/su_max           0.001 
_refine_ls_shift/su_mean          0.000 
 
loop_ 
 _atom_site_label 
 _atom_site_type_symbol 
 _atom_site_fract_x 
 _atom_site_fract_y 
 _atom_site_fract_z 
 _atom_site_U_iso_or_equiv 
 _atom_site_adp_type 
 _atom_site_occupancy 
 _atom_site_symmetry_multiplicity 
 _atom_site_calc_flag 
 _atom_site_refinement_flags 
 _atom_site_disorder_assembly 
 _atom_site_disorder_group 
Ti1 Ti 0.01248(7) 0.25487(4) 0.68770(5) 0.0313(3) Uani 1 1 d . . . 
Ti2 Ti 0.30556(7) 0.39019(4) 0.84841(5) 0.0347(3) Uani 1 1 d . . . 
Li1 Li 0.2356(7) 0.3171(4) 0.7052(5) 0.041(2) Uani 1 1 d . . . 
O11 O 0.1574(3) 0.24666(15) 0.70372(17) 0.0325(8) Uani 1 1 d . . . 
O12 O 0.0243(3) 0.16841(16) 0.67996(19) 0.0388(9) Uani 1 1 d . . . 
C11 C 0.1858(4) 0.1900(2) 0.6941(2) 0.0324(12) Uani 1 1 d . . . 
C12 C 0.1115(4) 0.1459(2) 0.6810(3) 0.0355(13) Uani 1 1 d . . . 
C13 C 0.1286(5) 0.0850(3) 0.6698(3) 0.0470(15) Uani 1 1 d . . . 
H13 H 0.0779 0.0555 0.6613 0.056 Uiso 1 1 calc R . . 
C14 C 0.2220(5) 0.0679(3) 0.6713(3) 0.0539(17) Uani 1 1 d . . . 
H14 H 0.2346 0.0261 0.6639 0.065 Uiso 1 1 calc R . . 
C15 C 0.2941(5) 0.1092(3) 0.6828(3) 0.0503(16) Uani 1 1 d . . . 
H15 H 0.3567 0.0963 0.6829 0.060 Uiso 1 1 calc R . . 
C16 C 0.2784(4) 0.1720(2) 0.6950(3) 0.0370(13) Uani 1 1 d . . . 
C17 C 0.3575(4) 0.2162(3) 0.7066(3) 0.0410(14) Uani 1 1 d . . . 
O18 O 0.3525(3) 0.27185(18) 0.7125(2) 0.0440(10) Uani 1 1 d . . . 
O19 O 0.4426(3) 0.1886(2) 0.7102(2) 0.0584(12) Uani 1 1 d . . . 
C20 C 0.5246(5) 0.2283(4) 0.7198(4) 0.074(2) Uani 1 1 d . . . 
H20A H 0.5109 0.2587 0.6856 0.110 Uiso 1 1 calc R . . 
H20B H 0.5813 0.2037 0.7199 0.110 Uiso 1 1 calc R . . 
H20C H 0.5379 0.2496 0.7604 0.110 Uiso 1 1 calc R . . 
O41 O 0.2634(3) 0.39199(16) 0.75346(17) 0.0351(9) Uani 1 1 d . . . 
O42 O 0.3312(3) 0.47435(17) 0.83334(19) 0.0418(10) Uani 1 1 d . . . 
C41 C 0.2750(4) 0.4461(2) 0.7278(3) 0.0378(13) Uani 1 1 d . . . 
C42 C 0.3135(4) 0.4923(2) 0.7728(3) 0.0415(14) Uani 1 1 d . . . 
C43 C 0.3320(5) 0.5506(3) 0.7555(4) 0.0599(19) Uani 1 1 d . . . 
H43 H 0.3591 0.5812 0.7865 0.072 Uiso 1 1 calc R . . 
C44 C 0.3103(6) 0.5638(3) 0.6914(4) 0.068(2) Uani 1 1 d . . . 
H44 H 0.3216 0.6041 0.6786 0.082 Uiso 1 1 calc R . . 
C45 C 0.2729(6) 0.5196(3) 0.6468(4) 0.0619(19) Uani 1 1 d . . . 
H45 H 0.2586 0.5297 0.6034 0.074 Uiso 1 1 calc R . . 
C46 C 0.2550(4) 0.4587(3) 0.6638(3) 0.0433(14) Uani 1 1 d . . . 
C47 C 0.2211(5) 0.4115(3) 0.6150(3) 0.0483(16) Uani 1 1 d . . . 
O48 O 0.2111(3) 0.35673(19) 0.6252(2) 0.0491(11) Uani 1 1 d . . . 
O49 O 0.2042(4) 0.4330(2) 0.5569(2) 0.0673(14) Uani 1 1 d . . . 
C50 C 0.1729(7) 0.3872(4) 0.5072(3) 0.082(3) Uani 1 1 d . . . 
H50A H 0.2261 0.3584 0.5103 0.123 Uiso 1 1 calc R . . 
H50B H 0.1543 0.4077 0.4660 0.123 Uiso 1 1 calc R . . 
H50C H 0.1171 0.3646 0.5118 0.123 Uiso 1 1 calc R . . 
Li2 Li 0.1684(7) 0.2625(4) 0.8409(5) 0.041(2) Uani 1 1 d . . . 
O21 O 0.0393(2) 0.26598(15) 0.78218(17) 0.0314(8) Uani 1 1 d . . . 
O22 O -0.1142(3) 0.24585(17) 0.69331(19) 0.0397(9) Uani 1 1 d . . . 
C21 C -0.0387(4) 0.2560(2) 0.8009(3) 0.0334(12) Uani 1 1 d . . . 
C22 C -0.1235(4) 0.2437(2) 0.7505(3) 0.0365(13) Uani 1 1 d . . . 
C23 C -0.2102(4) 0.2316(3) 0.7627(3) 0.0477(16) Uani 1 1 d . . . 
H23 H -0.2670 0.2217 0.7289 0.057 Uiso 1 1 calc R . . 
C24 C -0.2137(5) 0.2340(3) 0.8233(4) 0.0546(17) Uani 1 1 d . . . 
H24 H -0.2731 0.2262 0.8313 0.066 Uiso 1 1 calc R . . 
C25 C -0.1325(4) 0.2473(3) 0.8722(3) 0.0461(15) Uani 1 1 d . . . 
H25 H -0.1367 0.2493 0.9138 0.055 Uiso 1 1 calc R . . 
C26 C -0.0418(4) 0.2584(2) 0.8627(3) 0.0349(13) Uani 1 1 d . . . 
C27 C 0.0463(5) 0.2701(2) 0.9171(3) 0.0401(14) Uani 1 1 d . . . 
O28 O 0.1280(3) 0.26979(18) 0.91449(18) 0.0417(10) Uani 1 1 d . . . 
O29 O 0.0258(3) 0.2807(2) 0.9694(2) 0.0529(11) Uani 1 1 d . . . 
C30 C 0.1057(5) 0.2925(3) 1.0248(3) 0.0604(19) Uani 1 1 d . . . 
H30A H 0.1457 0.2553 1.0364 0.091 Uiso 1 1 calc R . . 
H30B H 0.0814 0.3041 1.0596 0.091 Uiso 1 1 calc R . . 
H30C H 0.1449 0.3262 1.0165 0.091 Uiso 1 1 calc R . . 
O51 O 0.2919(2) 0.29820(16) 0.84439(17) 0.0331(8) Uani 1 1 d . . . 
O52 O 0.4401(3) 0.36527(17) 0.86951(19) 0.0405(9) Uani 1 1 d . . . 
C51 C 0.3753(4) 0.2663(2) 0.8594(3) 0.0327(12) Uani 1 1 d . . . 
C52 C 0.4581(4) 0.3034(3) 0.8733(3) 0.0387(13) Uani 1 1 d . . . 
C53 C 0.5493(4) 0.2779(3) 0.8885(3) 0.0493(16) Uani 1 1 d . . . 
H53 H 0.6053 0.3033 0.8978 0.059 Uiso 1 1 calc R . . 
C54 C 0.5575(5) 0.2140(3) 0.8899(4) 0.0554(18) Uani 1 1 d . . . 
H54 H 0.6199 0.1957 0.8999 0.066 Uiso 1 1 calc R . . 
C55 C 0.4778(4) 0.1774(3) 0.8772(3) 0.0462(15) Uani 1 1 d . . . 
H55 H 0.4855 0.1339 0.8783 0.055 Uiso 1 1 calc R . . 
C56 C 0.3849(4) 0.2026(2) 0.8625(3) 0.0369(13) Uani 1 1 d . . . 
C57 C 0.2991(5) 0.1628(3) 0.8531(3) 0.0387(13) Uani 1 1 d . . . 
O58 O 0.2174(3) 0.17984(17) 0.84441(19) 0.0424(10) Uani 1 1 d . . . 
O59 O 0.3213(3) 0.10266(18) 0.8555(2) 0.0538(12) Uani 1 1 d . . . 
C60 C 0.2413(5) 0.0609(3) 0.8468(4) 0.063(2) Uani 1 1 d . . . 
H60A H 0.2088 0.0696 0.8783 0.095 Uiso 1 1 calc R . . 
H60B H 0.2653 0.0184 0.8518 0.095 Uiso 1 1 calc R . . 
H60C H 0.1952 0.0663 0.8043 0.095 Uiso 1 1 calc R . . 
Li3 Li 0.0638(7) 0.3940(4) 0.7632(4) 0.039(2) Uani 1 1 d . . . 
O31 O 0.0321(3) 0.34753(15) 0.68811(16) 0.0317(8) Uani 1 1 d . . . 
O32 O -0.0309(3) 0.27208(16) 0.60017(18) 0.0407(10) Uani 1 1 d . . . 
C31 C -0.0022(4) 0.3738(2) 0.6313(3) 0.0342(12) Uani 1 1 d . . . 
C32 C -0.0371(4) 0.3315(3) 0.5817(3) 0.0406(14) Uani 1 1 d . . . 
C33 C -0.0718(6) 0.3505(3) 0.5205(3) 0.0594(19) Uani 1 1 d . . . 
H33 H -0.0936 0.3211 0.4875 0.071 Uiso 1 1 calc R . . 
C34 C -0.0752(6) 0.4129(3) 0.5064(3) 0.065(2) Uani 1 1 d . . . 
H34 H -0.0983 0.4264 0.4637 0.078 Uiso 1 1 calc R . . 
C35 C -0.0453(5) 0.4549(3) 0.5541(3) 0.0544(17) Uani 1 1 d . . . 
H35 H -0.0506 0.4976 0.5439 0.065 Uiso 1 1 calc R . . 
C36 C -0.0069(4) 0.4372(2) 0.6176(3) 0.0402(14) Uani 1 1 d . . . 
C37 C 0.0245(4) 0.4833(2) 0.6677(3) 0.0387(13) Uani 1 1 d . . . 
O38 O 0.0576(3) 0.47265(17) 0.7238(2) 0.0429(10) Uani 1 1 d . . . 
O39 O 0.0128(4) 0.54044(18) 0.6460(2) 0.0572(12) Uani 1 1 d . . . 
C40 C 0.0442(6) 0.5893(3) 0.6930(4) 0.071(2) Uani 1 1 d . . . 
H40A H 0.0032 0.5892 0.7205 0.106 Uiso 1 1 calc R . . 
H40B H 0.0385 0.6293 0.6716 0.106 Uiso 1 1 calc R . . 
H40C H 0.1119 0.5824 0.7185 0.106 Uiso 1 1 calc R . . 
O61 O 0.1658(3) 0.39222(16) 0.84335(17) 0.0329(8) Uani 1 1 d . . . 
O62 O 0.3178(3) 0.41027(17) 0.93336(18) 0.0411(9) Uani 1 1 d . . . 
C61 C 0.1504(4) 0.4139(2) 0.8955(3) 0.0338(12) Uani 1 1 d . . . 
C62 C 0.2357(4) 0.4253(2) 0.9463(3) 0.0393(13) Uani 1 1 d . . . 
C63 C 0.2333(5) 0.4499(3) 1.0023(3) 0.0487(16) Uani 1 1 d . . . 
H63 H 0.2916 0.4585 1.0354 0.058 Uiso 1 1 calc R . . 
C64 C 0.1443(6) 0.4619(3) 1.0096(3) 0.061(2) Uani 1 1 d . . . 
H64 H 0.1414 0.4791 1.0481 0.074 Uiso 1 1 calc R . . 
C65 C 0.0592(5) 0.4492(3) 0.9617(3) 0.0516(16) Uani 1 1 d . . . 
H65 H -0.0013 0.4569 0.9682 0.062 Uiso 1 1 calc R . . 
C66 C 0.0608(4) 0.4254(2) 0.9041(3) 0.0378(13) Uani 1 1 d . . . 
C67 C -0.0314(4) 0.4127(2) 0.8534(3) 0.0405(14) Uani 1 1 d . . . 
O68 O -0.0393(3) 0.39954(18) 0.7994(2) 0.0453(10) Uani 1 1 d . . . 
O69 O -0.1085(3) 0.4171(2) 0.8736(2) 0.0548(12) Uani 1 1 d . . . 
C70 C -0.2001(5) 0.4030(3) 0.8271(4) 0.067(2) Uani 1 1 d . . . 
H70A H -0.2114 0.4313 0.7913 0.100 Uiso 1 1 calc R . . 
H70B H -0.2522 0.4077 0.8460 0.100 Uiso 1 1 calc R . . 
H70C H -0.1992 0.3605 0.8125 0.100 Uiso 1 1 calc R . . 
Li4 Li 0.5467(9) 0.4349(8) 0.8959(6) 0.081(5) Uani 1 1 d . . . 
O101 O 0.5019(5) 0.4951(3) 0.9336(4) 0.109(2) Uani 1 1 d . . . 
H10A H 0.449(9) 0.519(5) 0.890(6) 0.163 Uiso 1 1 d . . . 
H10B H 0.480(9) 0.467(6) 0.972(6) 0.163 Uiso 1 1 d . . . 
O111 O 0.5615(4) 0.4530(4) 0.8145(4) 0.107(2) Uani 1 1 d . . . 
C112 C 0.5213(7) 0.4178(6) 0.7615(6) 0.114(4) Uani 1 1 d . . . 
H112 H 0.4959 0.3781 0.7650 0.137 Uiso 1 1 calc R . . 
N113 N 0.5185(5) 0.4385(3) 0.7086(4) 0.082(2) Uani 1 1 d . . . 
C114 C 0.5566(8) 0.4930(5) 0.6955(6) 0.116(4) Uani 1 1 d . . . 
H11A H 0.5038 0.5213 0.6744 0.175 Uiso 1 1 calc R . . 
H11B H 0.5959 0.4849 0.6678 0.175 Uiso 1 1 calc R . . 
H11C H 0.5974 0.5116 0.7350 0.175 Uiso 1 1 calc R . . 
C115 C 0.4662(7) 0.4010(5) 0.6502(5) 0.103(3) Uani 1 1 d . . . 
H11D H 0.4417 0.3628 0.6630 0.155 Uiso 1 1 calc R . . 
H11E H 0.5114 0.3911 0.6269 0.155 Uiso 1 1 calc R . . 
H11F H 0.4119 0.4250 0.6230 0.155 Uiso 1 1 calc R . . 
O121 O 0.6677(4) 0.4019(3) 0.9550(3) 0.0809(17) Uani 1 1 d D . . 
C122 C 0.6977(5) 0.4108(3) 1.0131(4) 0.066(2) Uani 1 1 d D . . 
H122 H 0.6560 0.4324 1.0311 0.079 Uiso 1 1 calc R . . 
N123 N 0.7816(4) 0.3929(2) 1.0515(3) 0.0538(14) Uani 1 1 d D . . 
C124 C 0.8112(6) 0.4070(4) 1.1166(4) 0.078(2) Uani 1 1 d D . . 
H12A H 0.7569 0.4255 1.1274 0.118 Uiso 1 1 calc R . . 
H12B H 0.8654 0.4362 1.1265 0.118 Uiso 1 1 calc R . . 
H12C H 0.8318 0.3692 1.1412 0.118 Uiso 1 1 calc R . . 
C125 C 0.8522(6) 0.3631(4) 1.0269(4) 0.080(3) Uani 1 1 d D . . 
H12D H 0.8742 0.3246 1.0499 0.121 Uiso 1 1 calc R . . 
H12E H 0.9077 0.3906 1.0323 0.121 Uiso 1 1 calc R . . 
H12F H 0.8220 0.3540 0.9819 0.121 Uiso 1 1 calc R . . 
O201 O 0.4653(10) 0.6228(6) 0.9059(6) 0.197(3) Uiso 1 1 d . . . 
C202 C 0.5318(16) 0.6556(11) 0.9305(9) 0.197(3) Uiso 1 1 d . . . 
H202 H 0.5926 0.6352 0.9404 0.237 Uiso 1 1 calc R . . 
N203 N 0.5397(14) 0.7132(9) 0.9469(8) 0.197(3) Uiso 1 1 d . . . 
C204 C 0.4519(14) 0.7364(9) 0.9428(9) 0.197(3) Uiso 1 1 d . . . 
H20D H 0.4422 0.7342 0.9843 0.296 Uiso 1 1 calc R . . 
H20E H 0.4015 0.7122 0.9122 0.296 Uiso 1 1 calc R . . 
H20F H 0.4481 0.7794 0.9289 0.296 Uiso 1 1 calc R . . 
C205 C 0.6204(15) 0.7392(9) 0.9691(9) 0.197(3) Uiso 1 1 d . . . 
H20G H 0.6608 0.7299 0.9425 0.296 Uiso 1 1 calc R . . 
H20H H 0.6524 0.7242 1.0121 0.296 Uiso 1 1 calc R . . 
H20I H 0.6109 0.7839 0.9701 0.296 Uiso 1 1 calc R . . 
O211 O 0.6213(13) 0.4380(8) 0.5112(8) 0.319(6) Uiso 1 1 d D . . 
C212 C 0.6435(15) 0.4220(10) 0.5676(9) 0.319(6) Uiso 1 1 d D . . 
H212 H 0.6116 0.4424 0.5932 0.383 Uiso 1 1 calc R . . 
N213 N 0.7071(11) 0.3795(7) 0.5947(7) 0.319(6) Uiso 1 1 d D . . 
C214 C 0.7503(17) 0.3774(11) 0.6609(8) 0.319(6) Uiso 1 1 d D . . 
H21A H 0.7228 0.4099 0.6805 0.479 Uiso 1 1 calc R . . 
H21B H 0.8204 0.3836 0.6715 0.479 Uiso 1 1 calc R . . 
H21C H 0.7378 0.3371 0.6767 0.479 Uiso 1 1 calc R . . 
C215 C 0.7189(18) 0.3255(8) 0.5588(9) 0.319(6) Uiso 1 1 d D . . 
H21D H 0.6947 0.2889 0.5747 0.479 Uiso 1 1 calc R . . 
H21E H 0.7878 0.3200 0.5634 0.479 Uiso 1 1 calc R . . 
H21F H 0.6822 0.3314 0.5140 0.479 Uiso 1 1 calc R . . 
 
loop_ 
 _atom_site_aniso_label 
 _atom_site_aniso_U_11 
 _atom_site_aniso_U_22 
 _atom_site_aniso_U_33 
 _atom_site_aniso_U_23 
 _atom_site_aniso_U_13 
 _atom_site_aniso_U_12 
Ti1 0.0309(5) 0.0276(5) 0.0348(6) -0.0010(4) 0.0094(4) -0.0012(4) 
Ti2 0.0308(6) 0.0321(5) 0.0410(6) -0.0012(4) 0.0112(5) -0.0010(4) 
Li1 0.043(6) 0.035(5) 0.051(6) -0.004(4) 0.024(5) -0.006(4) 
O11 0.032(2) 0.0260(18) 0.041(2) -0.0022(15) 0.0145(17) -0.0009(15) 
O12 0.035(2) 0.030(2) 0.049(2) 0.0005(17) 0.0092(18) -0.0053(16) 
C11 0.038(3) 0.029(3) 0.032(3) 0.004(2) 0.014(2) 0.004(2) 
C12 0.041(3) 0.030(3) 0.034(3) 0.002(2) 0.010(3) 0.003(2) 
C13 0.057(4) 0.031(3) 0.048(4) 0.000(3) 0.010(3) 0.001(3) 
C14 0.063(5) 0.030(3) 0.063(5) -0.005(3) 0.014(4) 0.011(3) 
C15 0.055(4) 0.044(4) 0.052(4) 0.000(3) 0.016(3) 0.019(3) 
C16 0.038(3) 0.038(3) 0.034(3) 0.003(2) 0.011(3) 0.006(2) 
C17 0.037(3) 0.052(4) 0.037(3) 0.003(3) 0.017(3) 0.008(3) 
O18 0.038(2) 0.043(2) 0.055(3) -0.0023(19) 0.020(2) -0.0002(18) 
O19 0.037(2) 0.063(3) 0.080(3) -0.006(2) 0.025(2) 0.008(2) 
C20 0.037(4) 0.089(6) 0.098(7) -0.009(5) 0.026(4) 0.000(4) 
O41 0.034(2) 0.031(2) 0.040(2) 0.0039(16) 0.0115(17) -0.0008(15) 
O42 0.038(2) 0.035(2) 0.051(3) -0.0029(18) 0.0120(19) -0.0027(16) 
C41 0.027(3) 0.032(3) 0.059(4) 0.008(3) 0.020(3) 0.003(2) 
C42 0.041(3) 0.031(3) 0.054(4) 0.004(3) 0.018(3) 0.001(2) 
C43 0.066(5) 0.036(3) 0.082(5) 0.002(3) 0.030(4) -0.007(3) 
C44 0.097(6) 0.029(3) 0.089(6) 0.010(4) 0.044(5) -0.006(3) 
C45 0.083(5) 0.047(4) 0.066(5) 0.021(3) 0.038(4) 0.007(4) 
C46 0.047(4) 0.041(3) 0.048(4) 0.010(3) 0.022(3) 0.003(3) 
C47 0.049(4) 0.052(4) 0.051(4) 0.011(3) 0.025(3) 0.002(3) 
O48 0.054(3) 0.050(3) 0.047(3) 0.005(2) 0.021(2) -0.004(2) 
O49 0.102(4) 0.058(3) 0.047(3) 0.018(2) 0.030(3) 0.004(3) 
C50 0.130(8) 0.078(5) 0.041(4) 0.011(4) 0.032(5) 0.013(5) 
Li2 0.030(5) 0.047(6) 0.046(6) 0.004(4) 0.014(4) 0.002(4) 
O21 0.030(2) 0.0331(19) 0.034(2) 0.0005(15) 0.0132(16) -0.0016(15) 
O22 0.030(2) 0.046(2) 0.041(2) -0.0019(18) 0.0072(18) -0.0038(16) 
C21 0.034(3) 0.023(3) 0.047(4) 0.001(2) 0.017(3) 0.000(2) 
C22 0.033(3) 0.029(3) 0.047(4) 0.003(2) 0.012(3) 0.000(2) 
C23 0.030(3) 0.049(4) 0.064(5) 0.006(3) 0.015(3) -0.005(3) 
C24 0.044(4) 0.061(4) 0.069(5) 0.013(3) 0.032(4) -0.005(3) 
C25 0.045(4) 0.046(3) 0.056(4) 0.014(3) 0.029(3) 0.003(3) 
C26 0.038(3) 0.027(3) 0.044(3) 0.006(2) 0.019(3) 0.002(2) 
C27 0.053(4) 0.028(3) 0.046(4) 0.005(2) 0.026(3) 0.001(2) 
O28 0.041(2) 0.048(2) 0.036(2) -0.0014(17) 0.0132(19) -0.0026(18) 
O29 0.062(3) 0.063(3) 0.040(3) -0.006(2) 0.026(2) -0.011(2) 
C30 0.074(5) 0.070(5) 0.046(4) -0.009(3) 0.031(4) -0.015(4) 
O51 0.027(2) 0.0310(19) 0.040(2) 0.0008(15) 0.0097(17) 0.0022(15) 
O52 0.031(2) 0.042(2) 0.046(2) -0.0005(18) 0.0090(18) 0.0004(16) 
C51 0.032(3) 0.033(3) 0.032(3) 0.001(2) 0.008(2) 0.004(2) 
C52 0.034(3) 0.039(3) 0.042(3) 0.004(3) 0.011(3) 0.002(2) 
C53 0.035(3) 0.055(4) 0.059(4) 0.006(3) 0.016(3) 0.003(3) 
C54 0.037(4) 0.052(4) 0.080(5) 0.010(3) 0.023(3) 0.016(3) 
C55 0.046(4) 0.039(3) 0.054(4) 0.002(3) 0.016(3) 0.013(3) 
C56 0.040(3) 0.036(3) 0.039(3) 0.003(2) 0.017(3) 0.005(2) 
C57 0.050(4) 0.035(3) 0.032(3) 0.003(2) 0.014(3) 0.006(3) 
O58 0.037(2) 0.038(2) 0.053(3) 0.0026(18) 0.014(2) 0.0019(17) 
O59 0.051(3) 0.035(2) 0.078(3) 0.003(2) 0.024(2) 0.0050(19) 
C60 0.071(5) 0.035(3) 0.087(6) 0.002(3) 0.030(4) -0.003(3) 
Li3 0.038(5) 0.039(5) 0.036(5) -0.003(4) 0.007(4) 0.006(4) 
O31 0.036(2) 0.0295(18) 0.030(2) -0.0001(15) 0.0099(17) 0.0001(15) 
O32 0.050(2) 0.033(2) 0.035(2) -0.0059(16) 0.0076(19) -0.0010(17) 
C31 0.035(3) 0.035(3) 0.031(3) 0.000(2) 0.008(2) 0.002(2) 
C32 0.048(4) 0.036(3) 0.032(3) 0.000(2) 0.005(3) 0.002(3) 
C33 0.083(5) 0.050(4) 0.037(4) -0.006(3) 0.006(4) 0.003(3) 
C34 0.095(6) 0.053(4) 0.035(4) 0.008(3) 0.003(4) 0.004(4) 
C35 0.074(5) 0.038(3) 0.046(4) 0.009(3) 0.011(3) 0.010(3) 
C36 0.048(4) 0.033(3) 0.039(3) 0.003(2) 0.013(3) 0.005(2) 
C37 0.040(3) 0.030(3) 0.047(4) 0.004(3) 0.014(3) 0.000(2) 
O38 0.051(3) 0.031(2) 0.043(3) -0.0028(18) 0.011(2) -0.0009(17) 
O39 0.081(3) 0.030(2) 0.052(3) 0.0040(19) 0.009(2) 0.002(2) 
C40 0.098(6) 0.034(4) 0.069(5) -0.002(3) 0.010(4) -0.002(4) 
O61 0.031(2) 0.036(2) 0.032(2) -0.0030(15) 0.0110(16) 0.0006(15) 
O62 0.038(2) 0.043(2) 0.038(2) -0.0038(17) 0.0055(18) 0.0003(17) 
C61 0.043(3) 0.026(3) 0.033(3) -0.003(2) 0.013(3) 0.000(2) 
C62 0.045(4) 0.034(3) 0.037(3) -0.001(2) 0.011(3) 0.002(2) 
C63 0.055(4) 0.047(4) 0.039(4) -0.013(3) 0.006(3) 0.002(3) 
C64 0.090(6) 0.063(4) 0.038(4) -0.013(3) 0.029(4) 0.014(4) 
C65 0.056(4) 0.050(4) 0.053(4) -0.008(3) 0.024(4) 0.007(3) 
C66 0.044(3) 0.031(3) 0.040(3) -0.005(2) 0.017(3) 0.001(2) 
C67 0.041(3) 0.027(3) 0.060(4) 0.000(3) 0.026(3) 0.004(2) 
O68 0.037(2) 0.045(2) 0.054(3) -0.006(2) 0.015(2) 0.0005(18) 
O69 0.042(3) 0.052(3) 0.078(3) -0.004(2) 0.030(2) 0.005(2) 
C70 0.037(4) 0.055(4) 0.109(6) -0.014(4) 0.023(4) 0.003(3) 
Li4 0.045(7) 0.126(12) 0.055(8) 0.020(7) -0.008(6) -0.047(7) 
O101 0.075(4) 0.099(5) 0.116(6) -0.006(4) -0.021(4) 0.006(4) 
O111 0.042(3) 0.179(7) 0.097(5) 0.029(5) 0.018(3) -0.006(4) 
C112 0.051(6) 0.179(12) 0.112(9) 0.075(9) 0.025(6) 0.008(6) 
N113 0.064(4) 0.087(5) 0.103(6) 0.017(4) 0.039(4) -0.005(4) 
C114 0.119(9) 0.088(7) 0.163(11) 0.028(7) 0.074(8) -0.010(6) 
C115 0.089(7) 0.117(8) 0.110(8) -0.026(6) 0.038(6) -0.026(6) 
O121 0.054(3) 0.079(4) 0.089(4) 0.007(3) -0.008(3) -0.002(3) 
C122 0.050(5) 0.054(4) 0.091(6) 0.009(4) 0.017(5) 0.000(3) 
N123 0.040(3) 0.057(3) 0.062(4) 0.014(3) 0.010(3) 0.014(2) 
C124 0.078(6) 0.085(6) 0.074(6) 0.013(4) 0.025(5) 0.031(5) 
C125 0.076(6) 0.096(6) 0.072(6) 0.013(5) 0.028(5) 0.040(5) 
 
_geom_special_details 
; 
 All esds (except the esd in the dihedral angle between two l.s. planes) 
 are estimated using the full covariance matrix.  The cell esds are taken 
 into account individually in the estimation of esds in distances, angles 
 and torsion angles; correlations between esds in cell parameters are only 
 used when they are defined by crystal symmetry.  An approximate (isotropic) 
 treatment of cell esds is used for estimating esds involving l.s. planes. 
; 
 
loop_ 
 _geom_bond_atom_site_label_1 
 _geom_bond_atom_site_label_2 
 _geom_bond_distance 
 _geom_bond_site_symmetry_2 
 _geom_bond_publ_flag 
Ti1 O32 1.889(4) . ? 
Ti1 O22 1.895(4) . ? 
Ti1 O12 1.896(4) . ? 
Ti1 O31 2.030(3) . ? 
Ti1 O11 2.030(4) . ? 
Ti1 O21 2.033(4) . ? 
Ti1 Li1 3.419(9) . ? 
Ti1 Li3 3.422(9) . ? 
Ti1 Li2 3.457(10) . ? 
Ti2 O62 1.897(4) . ? 
Ti2 O42 1.914(4) . ? 
Ti2 O52 1.937(4) . ? 
Ti2 O61 1.998(4) . ? 
Ti2 O51 2.004(4) . ? 
Ti2 O41 2.010(4) . ? 
Ti2 Li2 3.386(10) . ? 
Ti2 Li1 3.420(10) . ? 
Ti2 Li3 3.427(9) . ? 
Ti2 Li4 3.464(11) . ? 
Li1 O11 1.898(10) . ? 
Li1 O48 1.911(11) . ? 
Li1 O41 1.920(10) . ? 
Li1 O18 1.923(10) . ? 
O11 C11 1.334(6) . ? 
O12 C12 1.351(7) . ? 
C11 C16 1.396(8) . ? 
C11 C12 1.402(8) . ? 
C12 C13 1.381(8) . ? 
C13 C14 1.397(9) . ? 
C14 C15 1.342(9) . ? 
C15 C16 1.422(8) . ? 
C16 C17 1.455(8) . ? 
C17 O18 1.220(7) . ? 
C17 O19 1.352(7) . ? 
O19 C20 1.431(8) . ? 
O41 C41 1.340(6) . ? 
O42 C42 1.350(7) . ? 
C41 C46 1.390(8) . ? 
C41 C42 1.403(8) . ? 
C42 C43 1.372(8) . ? 
C43 C44 1.393(10) . ? 
C44 C45 1.365(10) . ? 
C45 C46 1.422(9) . ? 
C46 C47 1.462(9) . ? 
C47 O48 1.227(7) . ? 
C47 O49 1.325(7) . ? 
O49 C50 1.449(9) . ? 
Li2 O28 1.915(11) . ? 
Li2 O21 1.921(10) . ? 
Li2 O58 1.922(10) . ? 
Li2 O51 1.934(10) . ? 
Li2 Li3 3.434(13) . ? 
O21 C21 1.343(6) . ? 
O22 C22 1.326(7) . ? 
C21 C26 1.394(8) . ? 
C21 C22 1.407(8) . ? 
C22 C23 1.395(8) . ? 
C23 C24 1.368(9) . ? 
C24 C25 1.361(9) . ? 
C25 C26 1.420(8) . ? 
C26 C27 1.481(8) . ? 
C27 O28 1.208(7) . ? 
C27 O29 1.312(7) . ? 
O29 C30 1.426(8) . ? 
O51 C51 1.343(6) . ? 
O52 C52 1.364(7) . ? 
O52 Li4 2.110(12) . ? 
C51 C56 1.387(7) . ? 
C51 C52 1.400(8) . ? 
C52 C53 1.375(8) . ? 
C53 C54 1.390(9) . ? 
C54 C55 1.358(9) . ? 
C55 C56 1.397(8) . ? 
C56 C57 1.476(8) . ? 
C57 O58 1.199(7) . ? 
C57 O59 1.340(7) . ? 
O59 C60 1.438(8) . ? 
Li3 O31 1.884(10) . ? 
Li3 O38 1.908(10) . ? 
Li3 O68 1.916(11) . ? 
Li3 O61 1.929(10) . ? 
O31 C31 1.334(6) . ? 
O32 C32 1.346(7) . ? 
C31 C32 1.403(8) . ? 
C31 C36 1.406(8) . ? 
C32 C33 1.362(8) . ? 
C33 C34 1.387(9) . ? 
C34 C35 1.362(9) . ? 
C35 C36 1.403(8) . ? 
C36 C37 1.462(8) . ? 
C37 O38 1.212(7) . ? 
C37 O39 1.322(7) . ? 
O39 C40 1.459(8) . ? 
O61 C61 1.338(6) . ? 
O62 C62 1.353(7) . ? 
C61 C66 1.397(8) . ? 
C61 C62 1.413(8) . ? 
C62 C63 1.367(8) . ? 
C63 C64 1.378(10) . ? 
C64 C65 1.382(10) . ? 
C65 C66 1.393(8) . ? 
C66 C67 1.481(9) . ? 
C67 O68 1.207(7) . ? 
C67 O69 1.337(7) . ? 
O69 C70 1.438(8) . ? 
Li4 O101 1.784(19) . ? 
Li4 O111 1.933(15) . ? 
Li4 O121 1.969(14) . ? 
O111 C112 1.374(15) . ? 
C112 N113 1.252(11) . ? 
N113 C114 1.376(11) . ? 
N113 C115 1.519(12) . ? 
O121 C122 1.245(9) . ? 
C122 N123 1.309(9) . ? 
N123 C124 1.411(9) . ? 
N123 C125 1.459(9) . ? 
O201 C202 1.19(2) . ? 
C202 N203 1.30(2) . ? 
N203 C205 1.25(2) . ? 
N203 C204 1.35(2) . ? 
O211 C212 1.245(9) . ? 
C212 N213 1.310(9) . ? 
N213 C214 1.412(9) . ? 
N213 C215 1.460(9) . ? 
 
loop_ 
 _geom_angle_atom_site_label_1 
 _geom_angle_atom_site_label_2 
 _geom_angle_atom_site_label_3 
 _geom_angle 
 _geom_angle_site_symmetry_1 
 _geom_angle_site_symmetry_3 
 _geom_angle_publ_flag 
O32 Ti1 O22 94.24(18) . . ? 
O32 Ti1 O12 96.41(17) . . ? 
O22 Ti1 O12 91.26(16) . . ? 
O32 Ti1 O31 79.03(15) . . ? 
O22 Ti1 O31 103.90(16) . . ? 
O12 Ti1 O31 164.40(16) . . ? 
O32 Ti1 O11 100.89(17) . . ? 
O22 Ti1 O11 162.80(16) . . ? 
O12 Ti1 O11 79.05(15) . . ? 
O31 Ti1 O11 87.11(14) . . ? 
O32 Ti1 O21 160.02(15) . . ? 
O22 Ti1 O21 79.42(16) . . ? 
O12 Ti1 O21 102.61(16) . . ? 
O31 Ti1 O21 84.10(14) . . ? 
O11 Ti1 O21 88.78(15) . . ? 
O32 Ti1 Li1 92.1(2) . . ? 
O22 Ti1 Li1 160.0(2) . . ? 
O12 Ti1 Li1 106.90(19) . . ? 
O31 Ti1 Li1 58.78(19) . . ? 
O11 Ti1 Li1 28.42(18) . . ? 
O21 Ti1 Li1 88.3(2) . . ? 
O32 Ti1 Li3 106.51(19) . . ? 
O22 Ti1 Li3 97.1(2) . . ? 
O12 Ti1 Li3 154.8(2) . . ? 
O31 Ti1 Li3 27.85(19) . . ? 
O11 Ti1 Li3 86.44(19) . . ? 
O21 Ti1 Li3 56.26(19) . . ? 
Li1 Ti1 Li3 62.9(2) . . ? 
O32 Ti1 Li2 155.9(2) . . ? 
O22 Ti1 Li2 106.7(2) . . ? 
O12 Ti1 Li2 95.0(2) . . ? 
O31 Ti1 Li2 84.31(19) . . ? 
O11 Ti1 Li2 60.66(19) . . ? 
O21 Ti1 Li2 28.14(18) . . ? 
Li1 Ti1 Li2 64.3(2) . . ? 
Li3 Ti1 Li2 59.9(2) . . ? 
O62 Ti2 O42 89.66(17) . . ? 
O62 Ti2 O52 92.95(17) . . ? 
O42 Ti2 O52 94.08(17) . . ? 
O62 Ti2 O61 79.93(16) . . ? 
O42 Ti2 O61 102.69(16) . . ? 
O52 Ti2 O61 161.66(16) . . ? 
O62 Ti2 O51 104.49(16) . . ? 
O42 Ti2 O51 164.49(17) . . ? 
O52 Ti2 O51 79.11(15) . . ? 
O61 Ti2 O51 86.28(14) . . ? 
O62 Ti2 O41 161.60(16) . . ? 
O42 Ti2 O41 78.94(16) . . ? 
O52 Ti2 O41 102.15(16) . . ? 
O61 Ti2 O41 88.46(15) . . ? 
O51 Ti2 O41 88.81(15) . . ? 
O62 Ti2 Li2 96.1(2) . . ? 
O42 Ti2 Li2 156.3(2) . . ? 
O52 Ti2 Li2 108.5(2) . . ? 
O61 Ti2 Li2 56.18(19) . . ? 
O51 Ti2 Li2 30.12(19) . . ? 
O41 Ti2 Li2 89.1(2) . . ? 
O62 Ti2 Li1 161.0(2) . . ? 
O42 Ti2 Li1 107.2(2) . . ? 
O52 Ti2 Li1 94.4(2) . . ? 
O61 Ti2 Li1 87.71(19) . . ? 
O51 Ti2 Li1 60.03(19) . . ? 
O41 Ti2 Li1 28.79(18) . . ? 
Li2 Ti2 Li1 65.0(2) . . ? 
O62 Ti2 Li3 107.8(2) . . ? 
O42 Ti2 Li3 95.8(2) . . ? 
O52 Ti2 Li3 157.0(2) . . ? 
O61 Ti2 Li3 28.66(19) . . ? 
O51 Ti2 Li3 85.98(18) . . ? 
O41 Ti2 Li3 59.8(2) . . ? 
Li2 Ti2 Li3 60.5(2) . . ? 
Li1 Ti2 Li3 62.8(2) . . ? 
O62 Ti2 Li4 82.1(3) . . ? 
O42 Ti2 Li4 63.4(3) . . ? 
O52 Ti2 Li4 32.6(3) . . ? 
O61 Ti2 Li4 157.4(3) . . ? 
O51 Ti2 Li4 111.6(3) . . ? 
O41 Ti2 Li4 105.0(3) . . ? 
Li2 Ti2 Li4 140.1(3) . . ? 
Li1 Ti2 Li4 112.9(3) . . ? 
Li3 Ti2 Li4 157.5(3) . . ? 
O11 Li1 O48 114.3(5) . . ? 
O11 Li1 O41 135.2(6) . . ? 
O48 Li1 O41 95.0(4) . . ? 
O11 Li1 O18 95.7(4) . . ? 
O48 Li1 O18 102.0(5) . . ? 
O41 Li1 O18 111.1(5) . . ? 
O11 Li1 Ti1 30.6(2) . . ? 
O48 Li1 Ti1 100.4(4) . . ? 
O41 Li1 Ti1 115.0(4) . . ? 
O18 Li1 Ti1 126.1(4) . . ? 
O11 Li1 Ti2 112.9(4) . . ? 
O48 Li1 Ti2 125.2(4) . . ? 
O41 Li1 Ti2 30.3(2) . . ? 
O18 Li1 Ti2 99.4(4) . . ? 
Ti1 Li1 Ti2 106.4(3) . . ? 
C11 O11 Li1 122.0(4) . . ? 
C11 O11 Ti1 114.1(3) . . ? 
Li1 O11 Ti1 121.0(3) . . ? 
C12 O12 Ti1 117.9(3) . . ? 
O11 C11 C16 126.9(5) . . ? 
O11 C11 C12 113.9(5) . . ? 
C16 C11 C12 119.1(5) . . ? 
O12 C12 C13 124.3(5) . . ? 
O12 C12 C11 114.4(4) . . ? 
C13 C12 C11 121.3(5) . . ? 
C12 C13 C14 118.7(6) . . ? 
C15 C14 C13 121.3(6) . . ? 
C14 C15 C16 121.0(6) . . ? 
C11 C16 C15 118.5(5) . . ? 
C11 C16 C17 121.5(5) . . ? 
C15 C16 C17 119.9(5) . . ? 
O18 C17 O19 121.1(5) . . ? 
O18 C17 C16 126.9(5) . . ? 
O19 C17 C16 112.1(5) . . ? 
C17 O18 Li1 125.3(5) . . ? 
C17 O19 C20 116.5(5) . . ? 
C41 O41 Li1 122.3(5) . . ? 
C41 O41 Ti2 115.4(3) . . ? 
Li1 O41 Ti2 120.9(3) . . ? 
C42 O42 Ti2 117.7(3) . . ? 
O41 C41 C46 126.6(5) . . ? 
O41 C41 C42 113.3(5) . . ? 
C46 C41 C42 120.1(5) . . ? 
O42 C42 C43 123.7(6) . . ? 
O42 C42 C41 114.6(5) . . ? 
C43 C42 C41 121.8(6) . . ? 
C42 C43 C44 118.5(7) . . ? 
C45 C44 C43 120.8(6) . . ? 
C44 C45 C46 121.5(7) . . ? 
C41 C46 C45 117.4(6) . . ? 
C41 C46 C47 122.7(5) . . ? 
C45 C46 C47 119.9(6) . . ? 
O48 C47 O49 121.7(6) . . ? 
O48 C47 C46 124.8(6) . . ? 
O49 C47 C46 113.4(5) . . ? 
C47 O48 Li1 127.7(5) . . ? 
C47 O49 C50 115.1(5) . . ? 
O28 Li2 O21 94.8(4) . . ? 
O28 Li2 O58 104.6(5) . . ? 
O21 Li2 O58 109.5(5) . . ? 
O28 Li2 O51 117.6(5) . . ? 
O21 Li2 O51 134.9(6) . . ? 
O58 Li2 O51 92.5(4) . . ? 
O28 Li2 Ti2 103.0(4) . . ? 
O21 Li2 Ti2 115.7(4) . . ? 
O58 Li2 Ti2 123.8(4) . . ? 
O51 Li2 Ti2 31.3(2) . . ? 
O28 Li2 Li3 99.0(4) . . ? 
O21 Li2 Li3 56.1(3) . . ? 
O58 Li2 Li3 153.5(5) . . ? 
O51 Li2 Li3 86.8(4) . . ? 
Ti2 Li2 Li3 60.3(2) . . ? 
O28 Li2 Ti1 124.6(4) . . ? 
O21 Li2 Ti1 29.9(2) . . ? 
O58 Li2 Ti1 96.6(4) . . ? 
O51 Li2 Ti1 111.7(4) . . ? 
Ti2 Li2 Ti1 106.3(3) . . ? 
Li3 Li2 Ti1 59.6(2) . . ? 
C21 O21 Li2 121.3(4) . . ? 
C21 O21 Ti1 113.5(3) . . ? 
Li2 O21 Ti1 121.9(3) . . ? 
C22 O22 Ti1 117.6(3) . . ? 
O21 C21 C26 126.5(5) . . ? 
O21 C21 C22 113.2(5) . . ? 
C26 C21 C22 120.2(5) . . ? 
O22 C22 C23 124.5(5) . . ? 
O22 C22 C21 115.6(5) . . ? 
C23 C22 C21 119.8(6) . . ? 
C24 C23 C22 120.1(6) . . ? 
C25 C24 C23 120.5(6) . . ? 
C24 C25 C26 121.8(6) . . ? 
C21 C26 C25 117.5(5) . . ? 
C21 C26 C27 121.8(5) . . ? 
C25 C26 C27 120.7(5) . . ? 
O28 C27 O29 123.1(6) . . ? 
O28 C27 C26 124.7(5) . . ? 
O29 C27 C26 112.2(5) . . ? 
C27 O28 Li2 127.8(5) . . ? 
C27 O29 C30 116.8(5) . . ? 
C51 O51 Li2 123.8(4) . . ? 
C51 O51 Ti2 115.7(3) . . ? 
Li2 O51 Ti2 118.6(3) . . ? 
C52 O52 Ti2 116.7(3) . . ? 
C52 O52 Li4 125.2(6) . . ? 
Ti2 O52 Li4 117.7(5) . . ? 
O51 C51 C56 126.5(5) . . ? 
O51 C51 C52 113.8(5) . . ? 
C56 C51 C52 119.8(5) . . ? 
O52 C52 C53 124.2(5) . . ? 
O52 C52 C51 114.7(5) . . ? 
C53 C52 C51 121.1(5) . . ? 
C52 C53 C54 118.4(6) . . ? 
C55 C54 C53 121.1(6) . . ? 
C54 C55 C56 121.1(6) . . ? 
C51 C56 C55 118.4(5) . . ? 
C51 C56 C57 120.6(5) . . ? 
C55 C56 C57 121.0(5) . . ? 
O58 C57 O59 121.4(5) . . ? 
O58 C57 C56 126.2(5) . . ? 
O59 C57 C56 112.5(5) . . ? 
C57 O58 Li2 129.1(5) . . ? 
C57 O59 C60 115.7(5) . . ? 
O31 Li3 O38 96.1(5) . . ? 
O31 Li3 O68 113.8(5) . . ? 
O38 Li3 O68 102.0(5) . . ? 
O31 Li3 O61 135.5(5) . . ? 
O38 Li3 O61 110.8(5) . . ? 
O68 Li3 O61 94.9(5) . . ? 
O31 Li3 Ti1 30.2(2) . . ? 
O38 Li3 Ti1 126.2(4) . . ? 
O68 Li3 Ti1 100.6(4) . . ? 
O61 Li3 Ti1 115.0(4) . . ? 
O31 Li3 Ti2 113.6(4) . . ? 
O38 Li3 Ti2 99.7(4) . . ? 
O68 Li3 Ti2 124.7(4) . . ? 
O61 Li3 Ti2 29.8(2) . . ? 
Ti1 Li3 Ti2 106.1(2) . . ? 
O31 Li3 Li2 87.1(4) . . ? 
O38 Li3 Li2 157.6(5) . . ? 
O68 Li3 Li2 96.9(4) . . ? 
O61 Li3 Li2 55.1(3) . . ? 
Ti1 Li3 Li2 60.6(2) . . ? 
Ti2 Li3 Li2 59.1(2) . . ? 
C31 O31 Li3 122.0(4) . . ? 
C31 O31 Ti1 114.1(3) . . ? 
Li3 O31 Ti1 121.9(3) . . ? 
C32 O32 Ti1 118.2(3) . . ? 
O31 C31 C32 113.8(5) . . ? 
O31 C31 C36 127.0(5) . . ? 
C32 C31 C36 119.2(5) . . ? 
O32 C32 C33 124.4(5) . . ? 
O32 C32 C31 114.4(5) . . ? 
C33 C32 C31 121.3(5) . . ? 
C32 C33 C34 119.9(6) . . ? 
C35 C34 C33 119.8(6) . . ? 
C34 C35 C36 122.1(6) . . ? 
C35 C36 C31 117.7(5) . . ? 
C35 C36 C37 120.9(5) . . ? 
C31 C36 C37 121.4(5) . . ? 
O38 C37 O39 121.3(5) . . ? 
O38 C37 C36 125.8(5) . . ? 
O39 C37 C36 112.9(5) . . ? 
C37 O38 Li3 126.3(5) . . ? 
C37 O39 C40 116.3(5) . . ? 
C61 O61 Li3 120.5(4) . . ? 
C61 O61 Ti2 113.9(3) . . ? 
Li3 O61 Ti2 121.6(3) . . ? 
C62 O62 Ti2 117.2(3) . . ? 
O61 C61 C66 126.9(5) . . ? 
O61 C61 C62 114.5(5) . . ? 
C66 C61 C62 118.7(5) . . ? 
O62 C62 C63 124.6(5) . . ? 
O62 C62 C61 113.3(5) . . ? 
C63 C62 C61 122.1(6) . . ? 
C62 C63 C64 118.4(6) . . ? 
C63 C64 C65 121.0(6) . . ? 
C64 C65 C66 121.0(6) . . ? 
C65 C66 C61 118.6(6) . . ? 
C65 C66 C67 120.0(6) . . ? 
C61 C66 C67 121.4(5) . . ? 
O68 C67 O69 121.9(6) . . ? 
O68 C67 C66 125.7(5) . . ? 
O69 C67 C66 112.4(6) . . ? 
C67 O68 Li3 126.4(5) . . ? 
C67 O69 C70 115.2(6) . . ? 
O101 Li4 O111 117.3(9) . . ? 
O101 Li4 O121 109.4(7) . . ? 
O111 Li4 O121 111.3(8) . . ? 
O101 Li4 O52 108.1(7) . . ? 
O111 Li4 O52 100.0(6) . . ? 
O121 Li4 O52 110.4(7) . . ? 
O101 Li4 Ti2 82.2(5) . . ? 
O111 Li4 Ti2 99.8(4) . . ? 
O121 Li4 Ti2 135.0(6) . . ? 
O52 Li4 Ti2 29.7(2) . . ? 
C112 O111 Li4 123.5(8) . . ? 
N113 C112 O111 119.4(11) . . ? 
C112 N113 C114 127.8(11) . . ? 
C112 N113 C115 118.4(10) . . ? 
C114 N113 C115 113.8(9) . . ? 
C122 O121 Li4 125.9(7) . . ? 
O121 C122 N123 125.6(8) . . ? 
C122 N123 C124 121.8(7) . . ? 
C122 N123 C125 120.4(7) . . ? 
C124 N123 C125 117.5(6) . . ? 
O201 C202 N203 134(2) . . ? 
C205 N203 C202 122(2) . . ? 
C205 N203 C204 127(2) . . ? 
C202 N203 C204 110(2) . . ? 
O211 C212 N213 125.5(8) . . ? 
C212 N213 C214 121.4(7) . . ? 
C212 N213 C215 120.1(7) . . ? 
C214 N213 C215 117.2(6) . . ? 
 
loop_ 
 _geom_torsion_atom_site_label_1 
 _geom_torsion_atom_site_label_2 
 _geom_torsion_atom_site_label_3 
 _geom_torsion_atom_site_label_4 
 _geom_torsion 
 _geom_torsion_site_symmetry_1 
 _geom_torsion_site_symmetry_2 
 _geom_torsion_site_symmetry_3 
 _geom_torsion_site_symmetry_4 
 _geom_torsion_publ_flag 
O32 Ti1 Li1 O11 -109.3(4) . . . . ? 
O22 Ti1 Li1 O11 142.3(5) . . . . ? 
O12 Ti1 Li1 O11 -12.0(4) . . . . ? 
O31 Ti1 Li1 O11 174.8(5) . . . . ? 
O21 Ti1 Li1 O11 90.6(4) . . . . ? 
Li3 Ti1 Li1 O11 143.1(5) . . . . ? 
Li2 Ti1 Li1 O11 75.4(4) . . . . ? 
O32 Ti1 Li1 O48 11.5(4) . . . . ? 
O22 Ti1 Li1 O48 -96.9(7) . . . . ? 
O12 Ti1 Li1 O48 108.8(4) . . . . ? 
O31 Ti1 Li1 O48 -64.4(3) . . . . ? 
O11 Ti1 Li1 O48 120.8(6) . . . . ? 
O21 Ti1 Li1 O48 -148.5(4) . . . . ? 
Li3 Ti1 Li1 O48 -96.0(4) . . . . ? 
Li2 Ti1 Li1 O48 -163.8(4) . . . . ? 
O32 Ti1 Li1 O41 112.0(4) . . . . ? 
O22 Ti1 Li1 O41 3.6(10) . . . . ? 
O12 Ti1 Li1 O41 -150.7(4) . . . . ? 
O31 Ti1 Li1 O41 36.1(4) . . . . ? 
O11 Ti1 Li1 O41 -138.7(7) . . . . ? 
O21 Ti1 Li1 O41 -48.0(4) . . . . ? 
Li3 Ti1 Li1 O41 4.5(4) . . . . ? 
Li2 Ti1 Li1 O41 -63.3(4) . . . . ? 
O32 Ti1 Li1 O18 -101.8(5) . . . . ? 
O22 Ti1 Li1 O18 149.9(5) . . . . ? 
O12 Ti1 Li1 O18 -4.4(6) . . . . ? 
O31 Ti1 Li1 O18 -177.6(6) . . . . ? 
O11 Ti1 Li1 O18 7.6(3) . . . . ? 
O21 Ti1 Li1 O18 98.2(5) . . . . ? 
Li3 Ti1 Li1 O18 150.7(6) . . . . ? 
Li2 Ti1 Li1 O18 83.0(6) . . . . ? 
O32 Ti1 Li1 Ti2 143.1(2) . . . . ? 
O22 Ti1 Li1 Ti2 34.8(8) . . . . ? 
O12 Ti1 Li1 Ti2 -119.6(2) . . . . ? 
O31 Ti1 Li1 Ti2 67.2(2) . . . . ? 
O11 Ti1 Li1 Ti2 -107.6(5) . . . . ? 
O21 Ti1 Li1 Ti2 -16.9(2) . . . . ? 
Li3 Ti1 Li1 Ti2 35.6(2) . . . . ? 
Li2 Ti1 Li1 Ti2 -32.2(2) . . . . ? 
O62 Ti2 Li1 O11 -3.4(10) . . . . ? 
O42 Ti2 Li1 O11 -155.1(4) . . . . ? 
O52 Ti2 Li1 O11 109.2(4) . . . . ? 
O61 Ti2 Li1 O11 -52.5(4) . . . . ? 
O51 Ti2 Li1 O11 34.5(4) . . . . ? 
O41 Ti2 Li1 O11 -143.5(7) . . . . ? 
Li2 Ti2 Li1 O11 0.9(4) . . . . ? 
Li3 Ti2 Li1 O11 -67.4(4) . . . . ? 
Li4 Ti2 Li1 O11 137.1(5) . . . . ? 
O62 Ti2 Li1 O48 144.3(5) . . . . ? 
O42 Ti2 Li1 O48 -7.4(6) . . . . ? 
O52 Ti2 Li1 O48 -103.1(5) . . . . ? 
O61 Ti2 Li1 O48 95.2(5) . . . . ? 
O51 Ti2 Li1 O48 -177.8(6) . . . . ? 
O41 Ti2 Li1 O48 4.2(3) . . . . ? 
Li2 Ti2 Li1 O48 148.6(6) . . . . ? 
Li3 Ti2 Li1 O48 80.4(5) . . . . ? 
Li4 Ti2 Li1 O48 -75.2(6) . . . . ? 
O62 Ti2 Li1 O41 140.1(5) . . . . ? 
O42 Ti2 Li1 O41 -11.6(4) . . . . ? 
O52 Ti2 Li1 O41 -107.3(4) . . . . ? 
O61 Ti2 Li1 O41 91.0(4) . . . . ? 
O51 Ti2 Li1 O41 178.0(5) . . . . ? 
Li2 Ti2 Li1 O41 144.4(5) . . . . ? 
Li3 Ti2 Li1 O41 76.2(4) . . . . ? 
Li4 Ti2 Li1 O41 -79.4(5) . . . . ? 
O62 Ti2 Li1 O18 -103.7(6) . . . . ? 
O42 Ti2 Li1 O18 104.6(3) . . . . ? 
O52 Ti2 Li1 O18 8.9(4) . . . . ? 
O61 Ti2 Li1 O18 -152.8(3) . . . . ? 
O51 Ti2 Li1 O18 -65.8(3) . . . . ? 
O41 Ti2 Li1 O18 116.2(6) . . . . ? 
Li2 Ti2 Li1 O18 -99.4(4) . . . . ? 
Li3 Ti2 Li1 O18 -167.7(4) . . . . ? 
Li4 Ti2 Li1 O18 36.8(5) . . . . ? 
O62 Ti2 Li1 Ti1 28.4(8) . . . . ? 
O42 Ti2 Li1 Ti1 -123.3(2) . . . . ? 
O52 Ti2 Li1 Ti1 141.0(2) . . . . ? 
O61 Ti2 Li1 Ti1 -20.7(2) . . . . ? 
O51 Ti2 Li1 Ti1 66.3(2) . . . . ? 
O41 Ti2 Li1 Ti1 -111.7(5) . . . . ? 
Li2 Ti2 Li1 Ti1 32.7(2) . . . . ? 
Li3 Ti2 Li1 Ti1 -35.5(2) . . . . ? 
Li4 Ti2 Li1 Ti1 168.9(3) . . . . ? 
O48 Li1 O11 C11 91.6(6) . . . . ? 
O41 Li1 O11 C11 -142.2(7) . . . . ? 
O18 Li1 O11 C11 -14.3(7) . . . . ? 
Ti1 Li1 O11 C11 159.6(6) . . . . ? 
Ti2 Li1 O11 C11 -117.0(4) . . . . ? 
O48 Li1 O11 Ti1 -68.0(6) . . . . ? 
O41 Li1 O11 Ti1 58.2(9) . . . . ? 
O18 Li1 O11 Ti1 -173.9(3) . . . . ? 
Ti2 Li1 O11 Ti1 83.4(4) . . . . ? 
O32 Ti1 O11 C11 -87.3(3) . . . . ? 
O22 Ti1 O11 C11 63.9(7) . . . . ? 
O12 Ti1 O11 C11 7.2(3) . . . . ? 
O31 Ti1 O11 C11 -165.5(3) . . . . ? 
O21 Ti1 O11 C11 110.3(3) . . . . ? 
Li1 Ti1 O11 C11 -161.1(6) . . . . ? 
Li3 Ti1 O11 C11 166.6(4) . . . . ? 
Li2 Ti1 O11 C11 109.4(4) . . . . ? 
O32 Ti1 O11 Li1 73.8(4) . . . . ? 
O22 Ti1 O11 Li1 -135.0(6) . . . . ? 
O12 Ti1 O11 Li1 168.3(4) . . . . ? 
O31 Ti1 O11 Li1 -4.4(4) . . . . ? 
O21 Ti1 O11 Li1 -88.6(4) . . . . ? 
Li3 Ti1 O11 Li1 -32.3(4) . . . . ? 
Li2 Ti1 O11 Li1 -89.5(4) . . . . ? 
O32 Ti1 O12 C12 92.8(4) . . . . ? 
O22 Ti1 O12 C12 -172.8(4) . . . . ? 
O31 Ti1 O12 C12 20.8(8) . . . . ? 
O11 Ti1 O12 C12 -7.1(4) . . . . ? 
O21 Ti1 O12 C12 -93.4(4) . . . . ? 
Li1 Ti1 O12 C12 -1.3(4) . . . . ? 
Li3 Ti1 O12 C12 -63.0(6) . . . . ? 
Li2 Ti1 O12 C12 -65.9(4) . . . . ? 
Li1 O11 C11 C16 12.1(8) . . . . ? 
Ti1 O11 C11 C16 172.9(4) . . . . ? 
Li1 O11 C11 C12 -167.0(5) . . . . ? 
Ti1 O11 C11 C12 -6.1(6) . . . . ? 
Ti1 O12 C12 C13 -173.4(5) . . . . ? 
Ti1 O12 C12 C11 6.0(6) . . . . ? 
O11 C11 C12 O12 0.5(7) . . . . ? 
C16 C11 C12 O12 -178.7(5) . . . . ? 
O11 C11 C12 C13 179.9(5) . . . . ? 
C16 C11 C12 C13 0.8(8) . . . . ? 
O12 C12 C13 C14 179.0(5) . . . . ? 
C11 C12 C13 C14 -0.4(9) . . . . ? 
C12 C13 C14 C15 -0.5(10) . . . . ? 
C13 C14 C15 C16 0.9(10) . . . . ? 
O11 C11 C16 C15 -179.3(5) . . . . ? 
C12 C11 C16 C15 -0.3(8) . . . . ? 
O11 C11 C16 C17 -0.7(9) . . . . ? 
C12 C11 C16 C17 178.3(5) . . . . ? 
C14 C15 C16 C11 -0.6(9) . . . . ? 
C14 C15 C16 C17 -179.2(6) . . . . ? 
C11 C16 C17 O18 -4.9(9) . . . . ? 
C15 C16 C17 O18 173.6(6) . . . . ? 
C11 C16 C17 O19 175.3(5) . . . . ? 
C15 C16 C17 O19 -6.2(8) . . . . ? 
O19 C17 O18 Li1 177.6(5) . . . . ? 
C16 C17 O18 Li1 -2.2(9) . . . . ? 
O11 Li1 O18 C17 10.0(7) . . . . ? 
O48 Li1 O18 C17 -106.3(6) . . . . ? 
O41 Li1 O18 C17 153.5(5) . . . . ? 
Ti1 Li1 O18 C17 6.2(8) . . . . ? 
Ti2 Li1 O18 C17 124.5(5) . . . . ? 
O18 C17 O19 C20 -1.5(9) . . . . ? 
C16 C17 O19 C20 178.3(6) . . . . ? 
O11 Li1 O41 C41 -142.7(7) . . . . ? 
O48 Li1 O41 C41 -10.3(6) . . . . ? 
O18 Li1 O41 C41 94.6(6) . . . . ? 
Ti1 Li1 O41 C41 -114.2(5) . . . . ? 
Ti2 Li1 O41 C41 166.3(6) . . . . ? 
O11 Li1 O41 Ti2 51.1(9) . . . . ? 
O48 Li1 O41 Ti2 -176.6(3) . . . . ? 
O18 Li1 O41 Ti2 -71.7(6) . . . . ? 
Ti1 Li1 O41 Ti2 79.6(5) . . . . ? 
O62 Ti2 O41 C41 54.2(7) . . . . ? 
O42 Ti2 O41 C41 1.5(3) . . . . ? 
O52 Ti2 O41 C41 -90.3(4) . . . . ? 
O61 Ti2 O41 C41 104.8(3) . . . . ? 
O51 Ti2 O41 C41 -168.9(3) . . . . ? 
Li2 Ti2 O41 C41 161.0(4) . . . . ? 
Li1 Ti2 O41 C41 -167.2(6) . . . . ? 
Li3 Ti2 O41 C41 105.1(4) . . . . ? 
Li4 Ti2 O41 C41 -56.8(5) . . . . ? 
O62 Ti2 O41 Li1 -138.6(6) . . . . ? 
O42 Ti2 O41 Li1 168.7(4) . . . . ? 
O52 Ti2 O41 Li1 76.9(4) . . . . ? 
O61 Ti2 O41 Li1 -88.0(4) . . . . ? 
O51 Ti2 O41 Li1 -1.7(4) . . . . ? 
Li2 Ti2 O41 Li1 -31.9(4) . . . . ? 
Li3 Ti2 O41 Li1 -87.8(4) . . . . ? 
Li4 Ti2 O41 Li1 110.3(5) . . . . ? 
O62 Ti2 O42 C42 -167.3(4) . . . . ? 
O52 Ti2 O42 C42 99.8(4) . . . . ? 
O61 Ti2 O42 C42 -87.7(4) . . . . ? 
O51 Ti2 O42 C42 36.6(8) . . . . ? 
O41 Ti2 O42 C42 -1.8(4) . . . . ? 
Li2 Ti2 O42 C42 -62.8(7) . . . . ? 
Li1 Ti2 O42 C42 3.8(4) . . . . ? 
Li3 Ti2 O42 C42 -59.5(4) . . . . ? 
Li4 Ti2 O42 C42 111.3(5) . . . . ? 
Li1 O41 C41 C46 10.5(8) . . . . ? 
Ti2 O41 C41 C46 177.4(5) . . . . ? 
Li1 O41 C41 C42 -168.0(5) . . . . ? 
Ti2 O41 C41 C42 -1.0(6) . . . . ? 
Ti2 O42 C42 C43 -177.5(5) . . . . ? 
Ti2 O42 C42 C41 1.8(6) . . . . ? 
O41 C41 C42 O42 -0.5(7) . . . . ? 
C46 C41 C42 O42 -179.0(5) . . . . ? 
O41 C41 C42 C43 178.9(6) . . . . ? 
C46 C41 C42 C43 0.3(9) . . . . ? 
O42 C42 C43 C44 -179.7(6) . . . . ? 
C41 C42 C43 C44 1.0(10) . . . . ? 
C42 C43 C44 C45 -1.1(11) . . . . ? 
C43 C44 C45 C46 -0.1(12) . . . . ? 
O41 C41 C46 C45 -179.8(6) . . . . ? 
C42 C41 C46 C45 -1.5(8) . . . . ? 
O41 C41 C46 C47 -2.7(9) . . . . ? 
C42 C41 C46 C47 175.7(5) . . . . ? 
C44 C45 C46 C41 1.4(10) . . . . ? 
C44 C45 C46 C47 -175.9(7) . . . . ? 
C41 C46 C47 O48 -3.3(10) . . . . ? 
C45 C46 C47 O48 173.8(6) . . . . ? 
C41 C46 C47 O49 178.6(6) . . . . ? 
C45 C46 C47 O49 -4.3(9) . . . . ? 
O49 C47 O48 Li1 178.0(6) . . . . ? 
C46 C47 O48 Li1 0.0(10) . . . . ? 
O11 Li1 O48 C47 150.8(6) . . . . ? 
O41 Li1 O48 C47 5.6(8) . . . . ? 
O18 Li1 O48 C47 -107.2(6) . . . . ? 
Ti1 Li1 O48 C47 122.2(5) . . . . ? 
Ti2 Li1 O48 C47 3.5(8) . . . . ? 
O48 C47 O49 C50 0.3(10) . . . . ? 
C46 C47 O49 C50 178.5(6) . . . . ? 
O62 Ti2 Li2 O28 13.9(4) . . . . ? 
O42 Ti2 Li2 O28 -89.3(6) . . . . ? 
O52 Ti2 Li2 O28 109.1(4) . . . . ? 
O61 Ti2 Li2 O28 -59.7(3) . . . . ? 
O51 Ti2 Li2 O28 122.4(6) . . . . ? 
O41 Ti2 Li2 O28 -148.4(4) . . . . ? 
Li1 Ti2 Li2 O28 -164.7(4) . . . . ? 
Li3 Ti2 Li2 O28 -93.1(4) . . . . ? 
Li4 Ti2 Li2 O28 98.9(5) . . . . ? 
O62 Ti2 Li2 O21 115.8(4) . . . . ? 
O42 Ti2 Li2 O21 12.7(9) . . . . ? 
O52 Ti2 Li2 O21 -149.0(4) . . . . ? 
O61 Ti2 Li2 O21 42.3(4) . . . . ? 
O51 Ti2 Li2 O21 -135.6(7) . . . . ? 
O41 Ti2 Li2 O21 -46.5(4) . . . . ? 
Li1 Ti2 Li2 O21 -62.8(4) . . . . ? 
Li3 Ti2 Li2 O21 8.8(4) . . . . ? 
Li4 Ti2 Li2 O21 -159.2(5) . . . . ? 
O62 Ti2 Li2 O58 -103.9(5) . . . . ? 
O42 Ti2 Li2 O58 153.0(4) . . . . ? 
O52 Ti2 Li2 O58 -8.7(6) . . . . ? 
O61 Ti2 Li2 O58 -177.5(6) . . . . ? 
O51 Ti2 Li2 O58 4.7(3) . . . . ? 
O41 Ti2 Li2 O58 93.8(5) . . . . ? 
Li1 Ti2 Li2 O58 77.5(5) . . . . ? 
Li3 Ti2 Li2 O58 149.1(6) . . . . ? 
Li4 Ti2 Li2 O58 -18.9(8) . . . . ? 
O62 Ti2 Li2 O51 -108.6(4) . . . . ? 
O42 Ti2 Li2 O51 148.3(4) . . . . ? 
O52 Ti2 Li2 O51 -13.4(4) . . . . ? 
O61 Ti2 Li2 O51 177.9(5) . . . . ? 
O41 Ti2 Li2 O51 89.1(4) . . . . ? 
Li1 Ti2 Li2 O51 72.8(4) . . . . ? 
Li3 Ti2 Li2 O51 144.4(5) . . . . ? 
Li4 Ti2 Li2 O51 -23.6(7) . . . . ? 
O62 Ti2 Li2 Li3 107.0(2) . . . . ? 
O42 Ti2 Li2 Li3 3.8(6) . . . . ? 
O52 Ti2 Li2 Li3 -157.8(2) . . . . ? 
O61 Ti2 Li2 Li3 33.4(2) . . . . ? 
O51 Ti2 Li2 Li3 -144.4(5) . . . . ? 
O41 Ti2 Li2 Li3 -55.3(2) . . . . ? 
Li1 Ti2 Li2 Li3 -71.6(3) . . . . ? 
Li4 Ti2 Li2 Li3 -168.0(4) . . . . ? 
O62 Ti2 Li2 Ti1 146.3(2) . . . . ? 
O42 Ti2 Li2 Ti1 43.2(7) . . . . ? 
O52 Ti2 Li2 Ti1 -118.5(2) . . . . ? 
O61 Ti2 Li2 Ti1 72.8(2) . . . . ? 
O51 Ti2 Li2 Ti1 -105.1(5) . . . . ? 
O41 Ti2 Li2 Ti1 -16.0(2) . . . . ? 
Li1 Ti2 Li2 Ti1 -32.3(2) . . . . ? 
Li3 Ti2 Li2 Ti1 39.3(2) . . . . ? 
Li4 Ti2 Li2 Ti1 -128.7(4) . . . . ? 
O32 Ti1 Li2 O28 139.9(4) . . . . ? 
O22 Ti1 Li2 O28 -9.3(5) . . . . ? 
O12 Ti1 Li2 O28 -102.1(5) . . . . ? 
O31 Ti1 Li2 O28 93.6(5) . . . . ? 
O11 Ti1 Li2 O28 -176.5(6) . . . . ? 
O21 Ti1 Li2 O28 5.5(3) . . . . ? 
Li1 Ti1 Li2 O28 151.6(6) . . . . ? 
Li3 Ti1 Li2 O28 79.4(5) . . . . ? 
O32 Ti1 Li2 O21 134.5(4) . . . . ? 
O22 Ti1 Li2 O21 -14.7(4) . . . . ? 
O12 Ti1 Li2 O21 -107.5(4) . . . . ? 
O31 Ti1 Li2 O21 88.1(4) . . . . ? 
O11 Ti1 Li2 O21 178.0(4) . . . . ? 
Li1 Ti1 Li2 O21 146.1(4) . . . . ? 
Li3 Ti1 Li2 O21 73.9(4) . . . . ? 
O32 Ti1 Li2 O58 -107.2(5) . . . . ? 
O22 Ti1 Li2 O58 103.6(3) . . . . ? 
O12 Ti1 Li2 O58 10.8(4) . . . . ? 
O31 Ti1 Li2 O58 -153.6(3) . . . . ? 
O11 Ti1 Li2 O58 -63.7(3) . . . . ? 
O21 Ti1 Li2 O58 118.3(6) . . . . ? 
Li1 Ti1 Li2 O58 -95.6(4) . . . . ? 
Li3 Ti1 Li2 O58 -167.8(4) . . . . ? 
O32 Ti1 Li2 O51 -11.8(8) . . . . ? 
O22 Ti1 Li2 O51 -161.0(4) . . . . ? 
O12 Ti1 Li2 O51 106.2(4) . . . . ? 
O31 Ti1 Li2 O51 -58.2(4) . . . . ? 
O11 Ti1 Li2 O51 31.7(3) . . . . ? 
O21 Ti1 Li2 O51 -146.3(7) . . . . ? 
Li1 Ti1 Li2 O51 -0.2(4) . . . . ? 
Li3 Ti1 Li2 O51 -72.4(4) . . . . ? 
O32 Ti1 Li2 Ti2 20.9(6) . . . . ? 
O22 Ti1 Li2 Ti2 -128.3(2) . . . . ? 
O12 Ti1 Li2 Ti2 138.9(2) . . . . ? 
O31 Ti1 Li2 Ti2 -25.5(2) . . . . ? 
O11 Ti1 Li2 Ti2 64.4(2) . . . . ? 
O21 Ti1 Li2 Ti2 -113.6(5) . . . . ? 
Li1 Ti1 Li2 Ti2 32.5(2) . . . . ? 
Li3 Ti1 Li2 Ti2 -39.7(2) . . . . ? 
O32 Ti1 Li2 Li3 60.6(5) . . . . ? 
O22 Ti1 Li2 Li3 -88.6(3) . . . . ? 
O12 Ti1 Li2 Li3 178.6(2) . . . . ? 
O31 Ti1 Li2 Li3 14.2(2) . . . . ? 
O11 Ti1 Li2 Li3 104.1(3) . . . . ? 
O21 Ti1 Li2 Li3 -73.9(4) . . . . ? 
Li1 Ti1 Li2 Li3 72.2(3) . . . . ? 
O28 Li2 O21 C21 -17.2(6) . . . . ? 
O58 Li2 O21 C21 90.1(6) . . . . ? 
O51 Li2 O21 C21 -155.0(6) . . . . ? 
Ti2 Li2 O21 C21 -124.1(4) . . . . ? 
Li3 Li2 O21 C21 -114.9(4) . . . . ? 
Ti1 Li2 O21 C21 158.3(6) . . . . ? 
O28 Li2 O21 Ti1 -175.5(2) . . . . ? 
O58 Li2 O21 Ti1 -68.1(6) . . . . ? 
O51 Li2 O21 Ti1 46.7(9) . . . . ? 
Ti2 Li2 O21 Ti1 77.6(5) . . . . ? 
Li3 Li2 O21 Ti1 86.8(3) . . . . ? 
O32 Ti1 O21 C21 78.8(6) . . . . ? 
O22 Ti1 O21 C21 5.9(3) . . . . ? 
O12 Ti1 O21 C21 -83.1(3) . . . . ? 
O31 Ti1 O21 C21 111.2(3) . . . . ? 
O11 Ti1 O21 C21 -161.6(3) . . . . ? 
Li1 Ti1 O21 C21 170.0(3) . . . . ? 
Li3 Ti1 O21 C21 111.9(4) . . . . ? 
Li2 Ti1 O21 C21 -159.8(5) . . . . ? 
O32 Ti1 O21 Li2 -121.4(6) . . . . ? 
O22 Ti1 O21 Li2 165.7(4) . . . . ? 
O12 Ti1 O21 Li2 76.8(4) . . . . ? 
O31 Ti1 O21 Li2 -89.0(4) . . . . ? 
O11 Ti1 O21 Li2 -1.7(4) . . . . ? 
Li1 Ti1 O21 Li2 -30.2(4) . . . . ? 
Li3 Ti1 O21 Li2 -88.3(4) . . . . ? 
O32 Ti1 O22 C22 -168.2(4) . . . . ? 
O12 Ti1 O22 C22 95.3(4) . . . . ? 
O31 Ti1 O22 C22 -88.4(4) . . . . ? 
O11 Ti1 O22 C22 40.1(7) . . . . ? 
O21 Ti1 O22 C22 -7.3(3) . . . . ? 
Li1 Ti1 O22 C22 -60.2(8) . . . . ? 
Li3 Ti1 O22 C22 -60.9(4) . . . . ? 
Li2 Ti1 O22 C22 -0.3(4) . . . . ? 
Li2 O21 C21 C26 18.1(7) . . . . ? 
Ti1 O21 C21 C26 178.1(4) . . . . ? 
Li2 O21 C21 C22 -163.6(5) . . . . ? 
Ti1 O21 C21 C22 -3.6(5) . . . . ? 
Ti1 O22 C22 C23 -173.9(4) . . . . ? 
Ti1 O22 C22 C21 7.6(6) . . . . ? 
O21 C21 C22 O22 -2.2(6) . . . . ? 
C26 C21 C22 O22 176.2(4) . . . . ? 
O21 C21 C22 C23 179.2(5) . . . . ? 
C26 C21 C22 C23 -2.4(8) . . . . ? 
O22 C22 C23 C24 -176.1(5) . . . . ? 
C21 C22 C23 C24 2.4(8) . . . . ? 
C22 C23 C24 C25 -0.8(10) . . . . ? 
C23 C24 C25 C26 -0.9(10) . . . . ? 
O21 C21 C26 C25 179.0(5) . . . . ? 
C22 C21 C26 C25 0.8(7) . . . . ? 
O21 C21 C26 C27 -3.0(8) . . . . ? 
C22 C21 C26 C27 178.8(5) . . . . ? 
C24 C25 C26 C21 0.9(8) . . . . ? 
C24 C25 C26 C27 -177.2(5) . . . . ? 
C21 C26 C27 O28 -10.9(8) . . . . ? 
C25 C26 C27 O28 167.1(5) . . . . ? 
C21 C26 C27 O29 169.5(5) . . . . ? 
C25 C26 C27 O29 -12.5(7) . . . . ? 
O29 C27 O28 Li2 -173.9(5) . . . . ? 
C26 C27 O28 Li2 6.5(9) . . . . ? 
O21 Li2 O28 C27 5.9(7) . . . . ? 
O58 Li2 O28 C27 -105.7(6) . . . . ? 
O51 Li2 O28 C27 153.4(5) . . . . ? 
Ti2 Li2 O28 C27 123.8(5) . . . . ? 
Li3 Li2 O28 C27 62.3(6) . . . . ? 
Ti1 Li2 O28 C27 3.2(8) . . . . ? 
O28 C27 O29 C30 0.4(8) . . . . ? 
C26 C27 O29 C30 180.0(5) . . . . ? 
O28 Li2 O51 C51 95.3(6) . . . . ? 
O21 Li2 O51 C51 -133.8(7) . . . . ? 
O58 Li2 O51 C51 -12.7(7) . . . . ? 
Ti2 Li2 O51 C51 163.4(6) . . . . ? 
Li3 Li2 O51 C51 -166.2(4) . . . . ? 
Ti1 Li2 O51 C51 -110.8(5) . . . . ? 
O28 Li2 O51 Ti2 -68.1(6) . . . . ? 
O21 Li2 O51 Ti2 62.8(9) . . . . ? 
O58 Li2 O51 Ti2 -176.1(3) . . . . ? 
Li3 Li2 O51 Ti2 30.4(4) . . . . ? 
Ti1 Li2 O51 Ti2 85.8(4) . . . . ? 
O62 Ti2 O51 C51 -87.9(4) . . . . ? 
O42 Ti2 O51 C51 67.4(7) . . . . ? 
O52 Ti2 O51 C51 2.3(3) . . . . ? 
O61 Ti2 O51 C51 -166.5(4) . . . . ? 
O41 Ti2 O51 C51 105.0(4) . . . . ? 
Li2 Ti2 O51 C51 -164.7(6) . . . . ? 
Li1 Ti2 O51 C51 104.0(4) . . . . ? 
Li3 Ti2 O51 C51 164.8(4) . . . . ? 
Li4 Ti2 O51 C51 -0.8(4) . . . . ? 
O62 Ti2 O51 Li2 76.8(4) . . . . ? 
O42 Ti2 O51 Li2 -127.9(6) . . . . ? 
O52 Ti2 O51 Li2 167.1(4) . . . . ? 
O61 Ti2 O51 Li2 -1.8(4) . . . . ? 
O41 Ti2 O51 Li2 -90.3(4) . . . . ? 
Li1 Ti2 O51 Li2 -91.3(4) . . . . ? 
Li3 Ti2 O51 Li2 -30.5(4) . . . . ? 
Li4 Ti2 O51 Li2 164.0(4) . . . . ? 
O62 Ti2 O52 C52 102.0(4) . . . . ? 
O42 Ti2 O52 C52 -168.2(4) . . . . ? 
O61 Ti2 O52 C52 35.6(7) . . . . ? 
O51 Ti2 O52 C52 -2.2(4) . . . . ? 
O41 Ti2 O52 C52 -88.6(4) . . . . ? 
Li2 Ti2 O52 C52 4.6(4) . . . . ? 
Li1 Ti2 O52 C52 -60.5(4) . . . . ? 
Li3 Ti2 O52 C52 -52.7(7) . . . . ? 
Li4 Ti2 O52 C52 172.4(7) . . . . ? 
O62 Ti2 O52 Li4 -70.4(5) . . . . ? 
O42 Ti2 O52 Li4 19.4(5) . . . . ? 
O61 Ti2 O52 Li4 -136.8(6) . . . . ? 
O51 Ti2 O52 Li4 -174.6(5) . . . . ? 
O41 Ti2 O52 Li4 99.0(5) . . . . ? 
Li2 Ti2 O52 Li4 -167.8(5) . . . . ? 
Li1 Ti2 O52 Li4 127.0(5) . . . . ? 
Li3 Ti2 O52 Li4 134.9(6) . . . . ? 
Li2 O51 C51 C56 13.5(8) . . . . ? 
Ti2 O51 C51 C56 177.3(5) . . . . ? 
Li2 O51 C51 C52 -165.9(5) . . . . ? 
Ti2 O51 C51 C52 -2.0(6) . . . . ? 
Ti2 O52 C52 C53 -179.2(5) . . . . ? 
Li4 O52 C52 C53 -7.4(9) . . . . ? 
Ti2 O52 C52 C51 1.8(6) . . . . ? 
Li4 O52 C52 C51 173.6(6) . . . . ? 
O51 C51 C52 O52 0.2(7) . . . . ? 
C56 C51 C52 O52 -179.2(5) . . . . ? 
O51 C51 C52 C53 -178.9(5) . . . . ? 
C56 C51 C52 C53 1.8(9) . . . . ? 
O52 C52 C53 C54 -179.2(6) . . . . ? 
C51 C52 C53 C54 -0.2(10) . . . . ? 
C52 C53 C54 C55 -0.6(11) . . . . ? 
C53 C54 C55 C56 -0.2(11) . . . . ? 
O51 C51 C56 C55 178.2(5) . . . . ? 
C52 C51 C56 C55 -2.5(8) . . . . ? 
O51 C51 C56 C57 -4.4(9) . . . . ? 
C52 C51 C56 C57 174.9(5) . . . . ? 
C54 C55 C56 C51 1.8(9) . . . . ? 
C54 C55 C56 C57 -175.6(6) . . . . ? 
C51 C56 C57 O58 -2.4(9) . . . . ? 
C55 C56 C57 O58 174.9(6) . . . . ? 
C51 C56 C57 O59 177.8(5) . . . . ? 
C55 C56 C57 O59 -4.8(8) . . . . ? 
O59 C57 O58 Li2 178.5(5) . . . . ? 
C56 C57 O58 Li2 -1.3(9) . . . . ? 
O28 Li2 O58 C57 -112.1(6) . . . . ? 
O21 Li2 O58 C57 147.3(5) . . . . ? 
O51 Li2 O58 C57 7.4(7) . . . . ? 
Ti2 Li2 O58 C57 4.9(8) . . . . ? 
Li3 Li2 O58 C57 95.4(11) . . . . ? 
Ti1 Li2 O58 C57 119.5(5) . . . . ? 
O58 C57 O59 C60 0.3(8) . . . . ? 
C56 C57 O59 C60 -180.0(5) . . . . ? 
O32 Ti1 Li3 O31 -9.8(4) . . . . ? 
O22 Ti1 Li3 O31 -106.3(4) . . . . ? 
O12 Ti1 Li3 O31 145.1(4) . . . . ? 
O11 Ti1 Li3 O31 90.6(4) . . . . ? 
O21 Ti1 Li3 O31 -178.5(5) . . . . ? 
Li1 Ti1 Li3 O31 73.9(4) . . . . ? 
Li2 Ti1 Li3 O31 148.5(5) . . . . ? 
O32 Ti1 Li3 O38 -3.8(6) . . . . ? 
O22 Ti1 Li3 O38 -100.3(5) . . . . ? 
O12 Ti1 Li3 O38 151.1(4) . . . . ? 
O31 Ti1 Li3 O38 6.0(3) . . . . ? 
O11 Ti1 Li3 O38 96.6(5) . . . . ? 
O21 Ti1 Li3 O38 -172.5(6) . . . . ? 
Li1 Ti1 Li3 O38 79.9(5) . . . . ? 
Li2 Ti1 Li3 O38 154.5(6) . . . . ? 
O32 Ti1 Li3 O68 109.8(4) . . . . ? 
O22 Ti1 Li3 O68 13.2(4) . . . . ? 
O12 Ti1 Li3 O68 -95.3(5) . . . . ? 
O31 Ti1 Li3 O68 119.6(6) . . . . ? 
O11 Ti1 Li3 O68 -149.9(4) . . . . ? 
O21 Ti1 Li3 O68 -58.9(3) . . . . ? 
Li1 Ti1 Li3 O68 -166.5(5) . . . . ? 
Li2 Ti1 Li3 O68 -92.0(4) . . . . ? 
O32 Ti1 Li3 O61 -149.6(4) . . . . ? 
O22 Ti1 Li3 O61 113.8(4) . . . . ? 
O12 Ti1 Li3 O61 5.3(8) . . . . ? 
O31 Ti1 Li3 O61 -139.8(7) . . . . ? 
O11 Ti1 Li3 O61 -49.3(4) . . . . ? 
O21 Ti1 Li3 O61 41.7(4) . . . . ? 
Li1 Ti1 Li3 O61 -65.9(4) . . . . ? 
Li2 Ti1 Li3 O61 8.6(4) . . . . ? 
O32 Ti1 Li3 Ti2 -119.1(2) . . . . ? 
O22 Ti1 Li3 Ti2 144.3(2) . . . . ? 
O12 Ti1 Li3 Ti2 35.7(6) . . . . ? 
O31 Ti1 Li3 Ti2 -109.4(5) . . . . ? 
O11 Ti1 Li3 Ti2 -18.8(2) . . . . ? 
O21 Ti1 Li3 Ti2 72.1(2) . . . . ? 
Li1 Ti1 Li3 Ti2 -35.4(3) . . . . ? 
Li2 Ti1 Li3 Ti2 39.1(2) . . . . ? 
O32 Ti1 Li3 Li2 -158.2(2) . . . . ? 
O22 Ti1 Li3 Li2 105.2(2) . . . . ? 
O12 Ti1 Li3 Li2 -3.4(6) . . . . ? 
O31 Ti1 Li3 Li2 -148.5(5) . . . . ? 
O11 Ti1 Li3 Li2 -57.9(2) . . . . ? 
O21 Ti1 Li3 Li2 33.0(2) . . . . ? 
Li1 Ti1 Li3 Li2 -74.5(3) . . . . ? 
O62 Ti2 Li3 O31 -157.9(4) . . . . ? 
O42 Ti2 Li3 O31 110.6(4) . . . . ? 
O52 Ti2 Li3 O31 -4.6(8) . . . . ? 
O61 Ti2 Li3 O31 -143.6(7) . . . . ? 
O51 Ti2 Li3 O31 -54.0(4) . . . . ? 
O41 Ti2 Li3 O31 37.0(4) . . . . ? 
Li2 Ti2 Li3 O31 -71.0(4) . . . . ? 
Li1 Ti2 Li3 O31 4.2(4) . . . . ? 
Li4 Ti2 Li3 O31 88.7(9) . . . . ? 
O62 Ti2 Li3 O38 101.0(4) . . . . ? 
O42 Ti2 Li3 O38 9.5(4) . . . . ? 
O52 Ti2 Li3 O38 -105.6(5) . . . . ? 
O61 Ti2 Li3 O38 115.3(5) . . . . ? 
O51 Ti2 Li3 O38 -155.0(4) . . . . ? 
O41 Ti2 Li3 O38 -64.1(3) . . . . ? 
Li2 Ti2 Li3 O38 -172.1(5) . . . . ? 
Li1 Ti2 Li3 O38 -96.8(4) . . . . ? 
Li4 Ti2 Li3 O38 -12.4(10) . . . . ? 
O62 Ti2 Li3 O68 -11.0(5) . . . . ? 
O42 Ti2 Li3 O68 -102.6(5) . . . . ? 
O52 Ti2 Li3 O68 142.3(4) . . . . ? 
O61 Ti2 Li3 O68 3.3(3) . . . . ? 
O51 Ti2 Li3 O68 92.9(5) . . . . ? 
O41 Ti2 Li3 O68 -176.1(6) . . . . ? 
Li2 Ti2 Li3 O68 75.9(5) . . . . ? 
Li1 Ti2 Li3 O68 151.1(6) . . . . ? 
Li4 Ti2 Li3 O68 -124.5(9) . . . . ? 
O62 Ti2 Li3 O61 -14.3(4) . . . . ? 
O42 Ti2 Li3 O61 -105.8(4) . . . . ? 
O52 Ti2 Li3 O61 139.0(5) . . . . ? 
O51 Ti2 Li3 O61 89.6(4) . . . . ? 
O41 Ti2 Li3 O61 -179.4(4) . . . . ? 
Li2 Ti2 Li3 O61 72.6(4) . . . . ? 
Li1 Ti2 Li3 O61 147.8(4) . . . . ? 
Li4 Ti2 Li3 O61 -127.7(9) . . . . ? 
O62 Ti2 Li3 Ti1 -126.7(2) . . . . ? 
O42 Ti2 Li3 Ti1 141.8(2) . . . . ? 
O52 Ti2 Li3 Ti1 26.6(7) . . . . ? 
O61 Ti2 Li3 Ti1 -112.4(5) . . . . ? 
O51 Ti2 Li3 Ti1 -22.8(2) . . . . ? 
O41 Ti2 Li3 Ti1 68.2(2) . . . . ? 
Li2 Ti2 Li3 Ti1 -39.8(3) . . . . ? 
Li1 Ti2 Li3 Ti1 35.4(2) . . . . ? 
Li4 Ti2 Li3 Ti1 119.9(8) . . . . ? 
O62 Ti2 Li3 Li2 -86.9(3) . . . . ? 
O42 Ti2 Li3 Li2 -178.5(2) . . . . ? 
O52 Ti2 Li3 Li2 66.4(6) . . . . ? 
O61 Ti2 Li3 Li2 -72.6(4) . . . . ? 
O51 Ti2 Li3 Li2 17.0(2) . . . . ? 
O41 Ti2 Li3 Li2 108.0(3) . . . . ? 
Li1 Ti2 Li3 Li2 75.2(3) . . . . ? 
Li4 Ti2 Li3 Li2 159.6(8) . . . . ? 
O28 Li2 Li3 O31 -140.3(5) . . . . ? 
O21 Li2 Li3 O31 -50.6(4) . . . . ? 
O58 Li2 Li3 O31 12.8(11) . . . . ? 
O51 Li2 Li3 O31 102.2(4) . . . . ? 
Ti2 Li2 Li3 O31 119.8(4) . . . . ? 
Ti1 Li2 Li3 O31 -15.3(2) . . . . ? 
O28 Li2 Li3 O38 120.8(12) . . . . ? 
O21 Li2 Li3 O38 -149.5(13) . . . . ? 
O58 Li2 Li3 O38 -86.0(16) . . . . ? 
O51 Li2 Li3 O38 3.3(13) . . . . ? 
Ti2 Li2 Li3 O38 20.9(12) . . . . ? 
Ti1 Li2 Li3 O38 -114.2(13) . . . . ? 
O28 Li2 Li3 O68 -26.7(5) . . . . ? 
O21 Li2 Li3 O68 63.0(4) . . . . ? 
O58 Li2 Li3 O68 126.5(10) . . . . ? 
O51 Li2 Li3 O68 -144.2(4) . . . . ? 
Ti2 Li2 Li3 O68 -126.6(4) . . . . ? 
Ti1 Li2 Li3 O68 98.3(4) . . . . ? 
O28 Li2 Li3 O61 64.5(4) . . . . ? 
O21 Li2 Li3 O61 154.3(5) . . . . ? 
O58 Li2 Li3 O61 -142.3(11) . . . . ? 
O51 Li2 Li3 O61 -53.0(4) . . . . ? 
Ti2 Li2 Li3 O61 -35.3(2) . . . . ? 
Ti1 Li2 Li3 O61 -170.4(4) . . . . ? 
O28 Li2 Li3 Ti1 -125.0(4) . . . . ? 
O21 Li2 Li3 Ti1 -35.3(2) . . . . ? 
O58 Li2 Li3 Ti1 28.1(10) . . . . ? 
O51 Li2 Li3 Ti1 117.5(4) . . . . ? 
Ti2 Li2 Li3 Ti1 135.1(2) . . . . ? 
O28 Li2 Li3 Ti2 99.8(4) . . . . ? 
O21 Li2 Li3 Ti2 -170.4(4) . . . . ? 
O58 Li2 Li3 Ti2 -107.0(10) . . . . ? 
O51 Li2 Li3 Ti2 -17.6(2) . . . . ? 
Ti1 Li2 Li3 Ti2 -135.1(3) . . . . ? 
O38 Li3 O31 C31 -12.2(6) . . . . ? 
O68 Li3 O31 C31 93.8(6) . . . . ? 
O61 Li3 O31 C31 -140.5(7) . . . . ? 
Ti1 Li3 O31 C31 162.9(6) . . . . ? 
Ti2 Li3 O31 C31 -115.6(4) . . . . ? 
Li2 Li3 O31 C31 -170.0(4) . . . . ? 
O38 Li3 O31 Ti1 -175.1(3) . . . . ? 
O68 Li3 O31 Ti1 -69.1(6) . . . . ? 
O61 Li3 O31 Ti1 56.6(9) . . . . ? 
Ti2 Li3 O31 Ti1 81.5(4) . . . . ? 
Li2 Li3 O31 Ti1 27.1(4) . . . . ? 
O32 Ti1 O31 C31 6.3(3) . . . . ? 
O22 Ti1 O31 C31 -85.4(4) . . . . ? 
O12 Ti1 O31 C31 80.6(7) . . . . ? 
O11 Ti1 O31 C31 108.0(4) . . . . ? 
O21 Ti1 O31 C31 -162.9(4) . . . . ? 
Li1 Ti1 O31 C31 105.5(4) . . . . ? 
Li3 Ti1 O31 C31 -164.1(6) . . . . ? 
Li2 Ti1 O31 C31 168.8(4) . . . . ? 
O32 Ti1 O31 Li3 170.5(4) . . . . ? 
O22 Ti1 O31 Li3 78.8(4) . . . . ? 
O12 Ti1 O31 Li3 -115.2(7) . . . . ? 
O11 Ti1 O31 Li3 -87.8(4) . . . . ? 
O21 Ti1 O31 Li3 1.2(4) . . . . ? 
Li1 Ti1 O31 Li3 -90.3(4) . . . . ? 
Li2 Ti1 O31 Li3 -27.1(4) . . . . ? 
O22 Ti1 O32 C32 97.3(4) . . . . ? 
O12 Ti1 O32 C32 -171.0(4) . . . . ? 
O31 Ti1 O32 C32 -6.1(4) . . . . ? 
O11 Ti1 O32 C32 -90.9(4) . . . . ? 
O21 Ti1 O32 C32 26.8(7) . . . . ? 
Li1 Ti1 O32 C32 -63.7(4) . . . . ? 
Li3 Ti1 O32 C32 -1.4(5) . . . . ? 
Li2 Ti1 O32 C32 -53.2(7) . . . . ? 
Li3 O31 C31 C32 -169.7(5) . . . . ? 
Ti1 O31 C31 C32 -5.5(6) . . . . ? 
Li3 O31 C31 C36 9.8(8) . . . . ? 
Ti1 O31 C31 C36 174.0(5) . . . . ? 
Ti1 O32 C32 C33 -176.5(5) . . . . ? 
Ti1 O32 C32 C31 4.9(7) . . . . ? 
O31 C31 C32 O32 0.8(7) . . . . ? 
C36 C31 C32 O32 -178.8(5) . . . . ? 
O31 C31 C32 C33 -177.9(6) . . . . ? 
C36 C31 C32 C33 2.6(9) . . . . ? 
O32 C32 C33 C34 179.9(7) . . . . ? 
C31 C32 C33 C34 -1.6(11) . . . . ? 
C32 C33 C34 C35 -1.1(12) . . . . ? 
C33 C34 C35 C36 2.7(12) . . . . ? 
C34 C35 C36 C31 -1.6(10) . . . . ? 
C34 C35 C36 C37 -179.9(7) . . . . ? 
O31 C31 C36 C35 179.5(6) . . . . ? 
C32 C31 C36 C35 -1.0(9) . . . . ? 
O31 C31 C36 C37 -2.2(9) . . . . ? 
C32 C31 C36 C37 177.3(6) . . . . ? 
C35 C36 C37 O38 179.2(6) . . . . ? 
C31 C36 C37 O38 1.0(10) . . . . ? 
C35 C36 C37 O39 -0.4(8) . . . . ? 
C31 C36 C37 O39 -178.6(5) . . . . ? 
O39 C37 O38 Li3 171.5(5) . . . . ? 
C36 C37 O38 Li3 -8.0(9) . . . . ? 
O31 Li3 O38 C37 12.0(7) . . . . ? 
O68 Li3 O38 C37 -104.0(6) . . . . ? 
O61 Li3 O38 C37 155.9(5) . . . . ? 
Ti1 Li3 O38 C37 9.0(8) . . . . ? 
Ti2 Li3 O38 C37 127.2(5) . . . . ? 
Li2 Li3 O38 C37 109.1(12) . . . . ? 
O38 C37 O39 C40 1.5(9) . . . . ? 
C36 C37 O39 C40 -178.8(6) . . . . ? 
O31 Li3 O61 C61 -153.2(7) . . . . ? 
O38 Li3 O61 C61 83.5(6) . . . . ? 
O68 Li3 O61 C61 -21.4(6) . . . . ? 
Ti1 Li3 O61 C61 -125.5(4) . . . . ? 
Ti2 Li3 O61 C61 155.9(6) . . . . ? 
Li2 Li3 O61 C61 -116.3(5) . . . . ? 
O31 Li3 O61 Ti2 50.9(9) . . . . ? 
O38 Li3 O61 Ti2 -72.4(5) . . . . ? 
O68 Li3 O61 Ti2 -177.3(2) . . . . ? 
Ti1 Li3 O61 Ti2 78.6(4) . . . . ? 
Li2 Li3 O61 Ti2 87.8(3) . . . . ? 
O62 Ti2 O61 C61 8.8(3) . . . . ? 
O42 Ti2 O61 C61 -78.6(3) . . . . ? 
O52 Ti2 O61 C61 77.1(6) . . . . ? 
O51 Ti2 O61 C61 114.2(3) . . . . ? 
O41 Ti2 O61 C61 -156.9(3) . . . . ? 
Li2 Ti2 O61 C61 113.2(4) . . . . ? 
Li1 Ti2 O61 C61 174.3(4) . . . . ? 
Li3 Ti2 O61 C61 -157.4(5) . . . . ? 
Li4 Ti2 O61 C61 -29.2(8) . . . . ? 
O62 Ti2 O61 Li3 166.1(4) . . . . ? 
O42 Ti2 O61 Li3 78.8(4) . . . . ? 
O52 Ti2 O61 Li3 -125.5(6) . . . . ? 
O51 Ti2 O61 Li3 -88.4(4) . . . . ? 
O41 Ti2 O61 Li3 0.5(4) . . . . ? 
Li2 Ti2 O61 Li3 -89.5(4) . . . . ? 
Li1 Ti2 O61 Li3 -28.3(4) . . . . ? 
Li4 Ti2 O61 Li3 128.1(7) . . . . ? 
O42 Ti2 O62 C62 92.8(4) . . . . ? 
O52 Ti2 O62 C62 -173.1(4) . . . . ? 
O61 Ti2 O62 C62 -10.1(4) . . . . ? 
O51 Ti2 O62 C62 -93.6(4) . . . . ? 
O41 Ti2 O62 C62 41.5(7) . . . . ? 
Li2 Ti2 O62 C62 -64.2(4) . . . . ? 
Li1 Ti2 O62 C62 -60.2(8) . . . . ? 
Li3 Ti2 O62 C62 -3.2(4) . . . . ? 
Li4 Ti2 O62 C62 156.0(5) . . . . ? 
Li3 O61 C61 C66 16.9(8) . . . . ? 
Ti2 O61 C61 C66 174.5(4) . . . . ? 
Li3 O61 C61 C62 -163.8(5) . . . . ? 
Ti2 O61 C61 C62 -6.1(5) . . . . ? 
Ti2 O62 C62 C63 -169.5(5) . . . . ? 
Ti2 O62 C62 C61 9.7(6) . . . . ? 
O61 C61 C62 O62 -1.9(7) . . . . ? 
C66 C61 C62 O62 177.5(5) . . . . ? 
O61 C61 C62 C63 177.3(5) . . . . ? 
C66 C61 C62 C63 -3.2(8) . . . . ? 
O62 C62 C63 C64 -178.7(6) . . . . ? 
C61 C62 C63 C64 2.2(9) . . . . ? 
C62 C63 C64 C65 0.2(10) . . . . ? 
C63 C64 C65 C66 -1.6(10) . . . . ? 
C64 C65 C66 C61 0.5(9) . . . . ? 
C64 C65 C66 C67 -179.5(6) . . . . ? 
O61 C61 C66 C65 -178.8(5) . . . . ? 
C62 C61 C66 C65 1.8(8) . . . . ? 
O61 C61 C66 C67 1.2(8) . . . . ? 
C62 C61 C66 C67 -178.2(5) . . . . ? 
C65 C66 C67 O68 170.1(6) . . . . ? 
C61 C66 C67 O68 -9.9(9) . . . . ? 
C65 C66 C67 O69 -10.1(7) . . . . ? 
C61 C66 C67 O69 169.9(5) . . . . ? 
O69 C67 O68 Li3 178.0(5) . . . . ? 
C66 C67 O68 Li3 -2.2(9) . . . . ? 
O31 Li3 O68 C67 160.4(5) . . . . ? 
O38 Li3 O68 C67 -97.3(6) . . . . ? 
O61 Li3 O68 C67 15.2(7) . . . . ? 
Ti1 Li3 O68 C67 131.8(5) . . . . ? 
Ti2 Li3 O68 C67 13.6(8) . . . . ? 
Li2 Li3 O68 C67 70.6(6) . . . . ? 
O68 C67 O69 C70 2.0(8) . . . . ? 
C66 C67 O69 C70 -177.8(5) . . . . ? 
C52 O52 Li4 O101 -141.0(7) . . . . ? 
Ti2 O52 Li4 O101 30.7(8) . . . . ? 
C52 O52 Li4 O111 95.9(7) . . . . ? 
Ti2 O52 Li4 O111 -92.4(7) . . . . ? 
C52 O52 Li4 O121 -21.4(10) . . . . ? 
Ti2 O52 Li4 O121 150.3(6) . . . . ? 
C52 O52 Li4 Ti2 -171.7(7) . . . . ? 
O62 Ti2 Li4 O101 -42.4(5) . . . . ? 
O42 Ti2 Li4 O101 51.1(5) . . . . ? 
O52 Ti2 Li4 O101 -150.6(8) . . . . ? 
O61 Ti2 Li4 O101 -4.7(10) . . . . ? 
O51 Ti2 Li4 O101 -145.0(5) . . . . ? 
O41 Ti2 Li4 O101 120.2(5) . . . . ? 
Li2 Ti2 Li4 O101 -132.5(5) . . . . ? 
Li1 Ti2 Li4 O101 149.6(5) . . . . ? 
Li3 Ti2 Li4 O101 75.6(10) . . . . ? 
O62 Ti2 Li4 O111 -158.9(7) . . . . ? 
O42 Ti2 Li4 O111 -65.3(6) . . . . ? 
O52 Ti2 Li4 O111 92.9(8) . . . . ? 
O61 Ti2 Li4 O111 -121.1(7) . . . . ? 
O51 Ti2 Li4 O111 98.6(6) . . . . ? 
O41 Ti2 Li4 O111 3.8(7) . . . . ? 
Li2 Ti2 Li4 O111 111.0(6) . . . . ? 
Li1 Ti2 Li4 O111 33.1(7) . . . . ? 
Li3 Ti2 Li4 O111 -40.8(13) . . . . ? 
O62 Ti2 Li4 O121 67.2(10) . . . . ? 
O42 Ti2 Li4 O121 160.8(12) . . . . ? 
O52 Ti2 Li4 O121 -41.0(9) . . . . ? 
O61 Ti2 Li4 O121 105.0(12) . . . . ? 
O51 Ti2 Li4 O121 -35.3(11) . . . . ? 
O41 Ti2 Li4 O121 -130.1(10) . . . . ? 
Li2 Ti2 Li4 O121 -22.9(13) . . . . ? 
Li1 Ti2 Li4 O121 -100.7(10) . . . . ? 
Li3 Ti2 Li4 O121 -174.7(6) . . . . ? 
O62 Ti2 Li4 O52 108.2(4) . . . . ? 
O42 Ti2 Li4 O52 -158.2(5) . . . . ? 
O61 Ti2 Li4 O52 146.0(5) . . . . ? 
O51 Ti2 Li4 O52 5.7(5) . . . . ? 
O41 Ti2 Li4 O52 -89.1(4) . . . . ? 
Li2 Ti2 Li4 O52 18.1(7) . . . . ? 
Li1 Ti2 Li4 O52 -59.8(5) . . . . ? 
Li3 Ti2 Li4 O52 -133.7(7) . . . . ? 
O101 Li4 O111 C112 -126.5(9) . . . . ? 
O121 Li4 O111 C112 106.6(9) . . . . ? 
O52 Li4 O111 C112 -10.1(12) . . . . ? 
Ti2 Li4 O111 C112 -40.3(10) . . . . ? 
Li4 O111 C112 N113 166.7(9) . . . . ? 
O111 C112 N113 C114 4.0(16) . . . . ? 
O111 C112 N113 C115 -174.9(8) . . . . ? 
O101 Li4 O121 C122 15.0(11) . . . . ? 
O111 Li4 O121 C122 146.1(8) . . . . ? 
O52 Li4 O121 C122 -103.8(9) . . . . ? 
Ti2 Li4 O121 C122 -83.5(12) . . . . ? 
Li4 O121 C122 N123 -174.3(7) . . . . ? 
O121 C122 N123 C124 177.6(7) . . . . ? 
O121 C122 N123 C125 4.1(11) . . . . ? 
O201 C202 N203 C205 -175(2) . . . . ? 
O201 C202 N203 C204 12(4) . . . . ? 
O211 C212 N213 C214 160(3) . . . . ? 
O211 C212 N213 C215 -34(3) . . . . ? 
 
_diffrn_measured_fraction_theta_max    0.999 
_diffrn_reflns_theta_full              25.00 
_diffrn_measured_fraction_theta_full   0.999 
_refine_diff_density_max    1.656 
_refine_diff_density_min   -0.749 
_refine_diff_density_rms    0.094 

#======================================================================

 
 
data_gr0547 #(Li[Li3(5b)6Ti2])
 
# 2. EXPERIMENTAL DATA
#---------------------
 
 
_publ_section_exptl_prep      #<< material & crystal preparation text
;    ?
;
 
_publ_section_exptl_refinement                #<< crystallographic methods used
;    ?
;
 
_chemical_formula_sum                 'C72 H90 Li4 N6 O24 Ti2'
_chemical_formula_moiety               ?
_chemical_formula_weight               1547.05
_chemical_melting_point                ?
 
_symmetry_cell_setting                 monoclinic
_symmetry_space_group_name_H-M         C_1_c_1
_symmetry_space_group_name_Hall        c_-2yc
 
loop_
_symmetry_equiv_pos_as_xyz
  +x,+y,+z  +x,-y,1/2+z  1/2+x,1/2+y,+z  1/2+x,1/2-y,1/2+z
 
_cell_length_a                         17.845(2)
_cell_length_b                         23.754(7)
_cell_length_c                         18.033(2)
_cell_angle_alpha                      90.00000
_cell_angle_beta                       96.426(4)
_cell_angle_gamma                      90.00000
_cell_volume                           7596(3)
_cell_formula_units_Z                  4
 
_exptl_crystal_density_diffrn          1.353
_exptl_crystal_density_meas            ?
_exptl_crystal_density_method          ?
_diffrn_radiation_type                'Cu K\a'
_diffrn_radiation_wavelength           1.54179
 
_cell_measurement_reflns_used          ?
_cell_measurement_theta_min            ?
_cell_measurement_theta_max            ?
_cell_measurement_temperature          150
 
_exptl_absorpt_coefficient_mu          2.459
_exptl_crystal_description             ?
_exptl_crystal_size_max                ?
_exptl_crystal_size_mid                ?
_exptl_crystal_size_min                ?
_exptl_crystal_size_rad                ?
_exptl_crystal_colour                  ?
 
_diffrn_measurement_device_type        CAD4
_diffrn_measurement_method             ?
_diffrn_detector_area_resol_mean       ?
 
_exptl_absorpt_correction_type         ?
_exptl_absorpt_process_details         ?
_exptl_absorpt_correction_T_min        ?
_exptl_absorpt_correction_T_max        ?
 
_diffrn_reflns_number                  7394
_reflns_number_total                   7000
_reflns_Friedel_coverage               0
_reflns_number_gt                      7186
_reflns_threshold_expression          'Fsqd >  .00 sig(Fsqd)'
 
_diffrn_reflns_theta_max               73.08
_diffrn_reflns_theta_full              ?
_diffrn_measured_fraction_theta_max    ?
_diffrn_measured_fraction_theta_full   ?
_diffrn_reflns_av_R_equivalents        .083
_diffrn_reflns_limit_h_min             0
_diffrn_reflns_limit_h_max             22
_diffrn_reflns_limit_k_min             0
_diffrn_reflns_limit_k_max             29
_diffrn_reflns_limit_l_min             -19
_diffrn_reflns_limit_l_max             22
_diffrn_standards_number               ?
_diffrn_standards_interval_count       ?
_diffrn_standards_interval_time        ?            #<< do not append units
_diffrn_standards_decay_%              ?            #<< do not append %
 
 
_refine_ls_structure_factor_coef       Fsqd
_refine_ls_R_factor_gt                 .13
_refine_ls_wR_factor_ref               .198
_refine_ls_goodness_of_fit_ref         1.011
_refine_ls_number_reflns               7000
_refine_ls_number_parameters           684
_refine_ls_weighting_scheme            calc
_refine_ls_weighting_details           ?
_refine_ls_hydrogen_treatment          ?
_refine_ls_shift/su_max                .096
_refine_diff_density_min               -1.293
_refine_diff_density_max               1.333
 
_refine_ls_extinction_method           ?
_refine_ls_extinction_coef             .00000
_refine_ls_abs_structure_details       ?
_refine_ls_abs_structure_Flack         ?
 
 
# 3. Information for the "methods" section
#-----------------------------------------
 
_computing_data_collection             ?
_computing_cell_refinement             ?
_computing_data_reduction             'xtal DIFDAT SORTRF ADDREF'
_computing_structure_solution          xtal
_computing_structure_refinement       'xtal CRYLSQ'
_computing_molecular_graphics          xtal
_computing_publication_material       'xtal BONDLA CIFIO'
 
 
# 4. Supplementary data for validation and tables
#------------------------------------------------
 
loop_
_atom_type_symbol
_atom_type_description
_atom_type_oxidation_number
_atom_type_number_in_cell
_atom_type_scat_dispersion_real
_atom_type_scat_dispersion_imag
_atom_type_scat_source
  C  ?  0  288  .017  .009  'Int Tables Vol IV Tables 2.2B and 2.3.1'
  H  ?  0  360  0  0  'Int Tables Vol IV Tables 2.2B and 2.3.1'
  O  ?  0  96  .047  .032  'Int Tables Vol IV Tables 2.2B and 2.3.1'
  N  ?  0  24  .029  .018  'Int Tables Vol IV Tables 2.2B and 2.3.1'
  Li  ?  0  16  .001  0  'Int Tables Vol IV Tables 2.2B and 2.3.1'
  Ti  ?  0  8  .189   1.807  'Int Tables Vol IV Tables 2.2B and 2.3.1'
 
loop_
_atom_site_label
_atom_site_fract_x
_atom_site_fract_y
_atom_site_fract_z
_atom_site_U_iso_or_equiv
_atom_site_adp_type
_atom_site_calc_flag
_atom_site_calc_attached_atom
_atom_site_occupancy
_atom_site_disorder_assembly
_atom_site_disorder_group
  Ti1  .7602(17)  .74782(10)  .5111(18)  .0250(12)  Uani  ?  ?  1.00000  ?  ?
  Ti2  .6313(17)  .74777(10)  .2172(18)  .0244(11)  Uani  ?  ?  1.00000  ?  ?
  O2a  .6523(17)  .7425(3)  .4757(18)  .023(3)  Uani  ?  ?  1.00000  ?  ?
  O3c  .6698(18)  .6997(4)  .1454(18)  .029(4)  Uani  ?  ?  1.00000  ?  ?
  O1a  .5083(18)  .7735(4)  .4045(18)  .036(5)  Uani  ?  ?  1.00000  ?  ?
  O1b  .6300(18)  .6109(4)  .4124(18)  .038(6)  Uani  ?  ?  1.00000  ?  ?
  O2e  .7676(17)  .8105(4)  .4338(18)  .029(5)  Uani  ?  ?  1.00000  ?  ?
  C8d  .9020(19)  .6931(7)  .496(2)  .034(7)  Uani  ?  ?  1.00000  ?  ?
  C8e  .7798(18)  .8607(6)  .543(2)  .030(7)  Uani  ?  ?  1.00000  ?  ?
  O2b  .6149(17)  .6937(4)  .2996(18)  .023(4)  Uani  ?  ?  1.00000  ?  ?
  O2d  .7838(18)  .6919(4)  .4310(18)  .031(5)  Uani  ?  ?  1.00000  ?  ?
  O1f  .6054(17)  .8724(4)  .4215(18)  .033(5)  Uani  ?  ?  1.00000  ?  ?
  O3d  .8661(18)  .7307(5)  .5385(18)  .040(4)  Uani  ?  ?  1.00000  ?  ?
  O1c  .8885(18)  .7704(4)  .3242(18)  .031(5)  Uani  ?  ?  1.00000  ?  ?
  C3b  .5639(18)  .6050(6)  .403(2)  .034(7)  Uani  ?  ?  1.00000  ?  ?
  C9e  .7788(18)  .8600(5)  .4679(19)  .032(5)  Uani  ?  ?  1.00000  ?  ?
  C6b  .3968(18)  .6411(7)  .267(2)  .046(9)  Uani  ?  ?  1.00000  ?  ?
  O1e  .7908(17)  .8707(4)  .3050(18)  .038(5)  Uani  ?  ?  1.00000  ?  ?
  C9d  .8534(18)  .6741(5)  .4348(19)  .022(6)  Uani  ?  ?  1.00000  ?  ?
  O3f  .6302(17)  .8115(4)  .1549(19)  .035(5)  Uani  ?  ?  1.00000  ?  ?
  C4f  .6044(19)  .9104(6)  .304(2)  .039(8)  Uani  ?  ?  1.00000  ?  ?
  C7e  .791(2)  .9116(6)  .584(2)  .063(11)  Uani  ?  ?  1.00000  ?  ?
  O1d  .7644(18)  .6115(4)  .3177(18)  .039(6)  Uani  ?  ?  1.00000  ?  ?
  C9c  .7853(18)  .7199(5)  .206(2)  .027(6)  Uani  ?  ?  1.00000  ?  ?
  C4c  .8670(19)  .7163(6)  .216(2)  .034(7)  Uani  ?  ?  1.00000  ?  ?
  O2f  .6269(18)  .8092(4)  .2940(18)  .025(5)  Uani  ?  ?  1.00000  ?  ?
  C3f  .6009(18)  .9140(6)  .385(2)  .033(8)  Uani  ?  ?  1.00000  ?  ?
  C8a  .6514(18)  .6942(5)  .582(2)  .026(6)  Uani  ?  ?  1.00000  ?  ?
  C7b  .4247(18)  .6804(7)  .217(2)  .042(9)  Uani  ?  ?  1.00000  ?  ?
  C8c  .7433(18)  .6912(6)  .1443(19)  .029(7)  Uani  ?  ?  1.00000  ?  ?
  C9a  .6073(19)  .7156(5)  .5191(19)  .027(6)  Uani  ?  ?  1.00000  ?  ?
  C3a  .4821(18)  .7440(6)  .453(2)  .028(7)  Uani  ?  ?  1.00000  ?  ?
  C3c  .9150(18)  .7411(6)  .278(2)  .033(7)  Uani  ?  ?  1.00000  ?  ?
  C5d  .9568(18)  .6180(6)  .406(2)  .040(8)  Uani  ?  ?  1.00000  ?  ?
  C5a  .4960(18)  .6852(7)  .568(2)  .036(8)  Uani  ?  ?  1.00000  ?  ?
  C4b  .5147(18)  .6358(6)  .337(2)  .030(6)  Uani  ?  ?  1.00000  ?  ?
  C3e  .7944(18)  .9137(7)  .3470(19)  .033(8)  Uani  ?  ?  1.00000  ?  ?
  C4d  .8805(18)  .6298(6)  .386(2)  .030(6)  Uani  ?  ?  1.00000  ?  ?
  C7c  .7815(19)  .6639(6)  .091(2)  .033(7)  Uani  ?  ?  1.00000  ?  ?
  C2b  .5246(18)  .5620(7)  .448(2)  .057(10)  Uani  ?  ?  1.00000  ?  ?
  C1b  .573(2)  .5308(8)  .504(2)  .078(13)  Uani  ?  ?  1.00000  ?  ?
  C1e  .806(2)  .9673(8)  .225(2)  .058(10)  Uani  ?  ?  1.00000  ?  ?
  C2a  .3974(19)  .7333(6)  .448(2)  .039(7)  Uani  ?  ?  1.00000  ?  ?
  C5f  .596(2)  .9611(7)  .260(2)  .046(9)  Uani  ?  ?  1.00000  ?  ?
  C5c  .8992(18)  .6858(7)  .158(2)  .044(9)  Uani  ?  ?  1.00000  ?  ?
  C1a  .3535(19)  .7645(6)  .387(2)  .041(7)  Uani  ?  ?  1.00000  ?  ?
  C4e  .7917(18)  .9128(6)  .428(2)  .032(7)  Uani  ?  ?  1.00000  ?  ?
  C9b  .5450(18)  .6711(6)  .293(2)  .032(8)  Uani  ?  ?  1.00000  ?  ?
  C6c  .8574(19)  .6607(6)  .096(2)  .040(8)  Uani  ?  ?  1.00000  ?  ?
  C7a  .620(2)  .6655(7)  .635(2)  .042(8)  Uani  ?  ?  1.00000  ?  ?
  C6a  .5390(19)  .6613(8)  .626(2)  .054(10)  Uani  ?  ?  1.00000  ?  ?
  C4a  .5308(18)  .7128(6)  .5158(19)  .028(7)  Uani  ?  ?  1.00000  ?  ?
  C5e  .805(2)  .9623(6)  .469(2)  .054(10)  Uani  ?  ?  1.00000  ?  ?
  C5b  .4353(18)  .6184(7)  .3256(19)  .038(8)  Uani  ?  ?  1.00000  ?  ?
  C2e  .8039(19)  .9705(6)  .306(2)  .045(9)  Uani  ?  ?  1.00000  ?  ?
  C2f  .588(2)  .9710(7)  .415(2)  .053(9)  Uani  ?  ?  1.00000  ?  ?
  C2c  .9981(19)  .7354(8)  .281(2)  .047(9)  Uani  ?  ?  1.00000  ?  ?
  C7d  .9777(18)  .6788(6)  .511(2)  .033(7)  Uani  ?  ?  1.00000  ?  ?
  C1f  .582(2)  .9658(6)  .501(2)  .064(10)  Uani  ?  ?  1.00000  ?  ?
  O3e  .7660(17)  .8130(4)  .5744(18)  .029(5)  Uani  ?  ?  1.00000  ?  ?
  C1c  1.0423(19)  .7703(10)  .345(2)  .087(13)  Uani  ?  ?  1.00000  ?  ?
  Li4  .699(2)  .4200(6)  .360(3)  .038(7)  Uani  ?  ?  1.00000  ?  ?
  C2d  .874(2)  .5640(6)  .280(2)  .050(9)  Uani  ?  ?  1.00000  ?  ?
  Li3  .701(2)  .6605(6)  .370(2)  .035(7)  Uani  ?  ?  1.00000  ?  ?
  C8b  .4978(18)  .6970(5)  .2321(19)  .023(6)  Uani  ?  ?  1.00000  ?  ?
  C7f  .606(2)  .9109(6)  .1479(18)  .044(8)  Uani  ?  ?  1.00000  ?  ?
  C3d  .8365(19)  .6030(5)  .330(2)  .035(7)  Uani  ?  ?  1.00000  ?  ?
  C8f  .6186(19)  .8642(6)  .185(2)  .035(8)  Uani  ?  ?  1.00000  ?  ?
  C6d  1.0076(19)  .6406(7)  .465(2)  .043(8)  Uani  ?  ?  1.00000  ?  ?
  C1d  .818(2)  .5340(8)  .220(2)  .060(10)  Uani  ?  ?  1.00000  ?  ?
  O2c  .7461(17)  .7442(4)  .2585(18)  .026(2)  Uiso  ?  ?  1.00000  ?  ?
  O3b  .5307(18)  .7324(4)  .1906(18)  .024(2)  Uiso  ?  ?  1.00000  ?  ?
  C9f  .6163(18)  .8627(6)  .2658(19)  .027(3)  Uiso  ?  ?  1.00000  ?  ?
  C6e  .7916(18)  .9614(5)  .5463(19)  .041(3)  Uiso  ?  ?  1.00000  ?  ?
  O3a  .7279(18)  .6992(4)  .5852(18)  .030(2)  Uiso  ?  ?  1.00000  ?  ?
  C6f  .5839(18)  .9612(5)  .1850(19)  .047(3)  Uiso  ?  ?  1.00000  ?  ?
  Li2  .790(2)  .7921(10)  .335(2)  .030(5)  Uiso  ?  ?  1.00000  ?  ?
  Li1  .614(2)  .7960(9)  .397(2)  .025(5)  Uiso  ?  ?  1.00000  ?  ?
  O1la  .7669(19)  .8952(4)  -.0818(18)  .075(2)  Uiso  ?  ?  1.00000  ?  ?
  N1la  .7659(17)  .8462(3)  .0256(18)  .075(2)  Uiso  ?  ?  1.00000  ?  ?
  C1la  .7907(18)  .8866(3)  -.0206(18)  .075(2)  Uiso  ?  ?  1.00000  ?  ?
  C2la  .7061(18)  .8057(5)  -.0071(18)  .075(2)  Uiso  ?  ?  1.00000  ?  ?
  C3la  .7893(18)  .8404(5)  .0881(18)  .075(2)  Uiso  ?  ?  1.00000  ?  ?
  H1la  .8314(18)  .9097(6)  -.0001(19)  .075(2)  Uiso  ?  ?  1.00000  ?  ?
  H3laa  .8074(18)  .8754(6)  .1081(18)  .075(2)  Uiso  ?  ?  1.00000  ?  ?
  H3lab  .8294(19)  .8139(7)  .0917(19)  .075(2)  Uiso  ?  ?  1.00000  ?  ?
  H3lac  .7503(19)  .8271(6)  .1152(18)  .075(2)  Uiso  ?  ?  1.00000  ?  ?
  H2laa  .6617(17)  .8259(8)  -.0246(19)  .075(2)  Uiso  ?  ?  1.00000  ?  ?
  H2lab  .695(2)  .7796(6)  .0301(19)  .075(2)  Uiso  ?  ?  1.00000  ?  ?
  H2lac  .724(2)  .7860(5)  -.0476(19)  .075(2)  Uiso  ?  ?  1.00000  ?  ?
  O1lb  .5651(18)  .9086(4)  .7591(18)  .068(2)  Uiso  ?  ?  1.00000  ?  ?
  N1lb  .6451(17)  .8429(3)  .7175(18)  .068(2)  Uiso  ?  ?  1.00000  ?  ?
  C1lb  .6281(17)  .8774(3)  .7681(18)  .068(2)  Uiso  ?  ?  1.00000  ?  ?
  C2lb  .6000(18)  .8394(5)  .6336(18)  .068(2)  Uiso  ?  ?  1.00000  ?  ?
  C3lb  .6980(18)  .7991(4)  .7364(18)  .068(2)  Uiso  ?  ?  1.00000  ?  ?
  H1lb  .6612(18)  .8808(5)  .8130(18)  .068(2)  Uiso  ?  ?  1.00000  ?  ?
  H3lba  .7464(17)  .8150(6)  .7503(19)  .068(2)  Uiso  ?  ?  1.00000  ?  ?
  H3lbb  .7001(18)  .7751(5)  .6945(19)  .068(2)  Uiso  ?  ?  1.00000  ?  ?
  H3lbc  .6829(18)  .7780(5)  .7769(19)  .068(2)  Uiso  ?  ?  1.00000  ?  ?
  H2lba  .5945(18)  .8762(6)  .6131(18)  .068(2)  Uiso  ?  ?  1.00000  ?  ?
  H2lbb  .5517(18)  .8232(6)  .6360(19)  .068(2)  Uiso  ?  ?  1.00000  ?  ?
  H2lbc  .6278(19)  .8167(6)  .6029(18)  .068(2)  Uiso  ?  ?  1.00000  ?  ?
  O1lc  .6512(17)  .38109(11)  .4350(18)  .04500  Uiso  ?  ?  1.00000  ?  ?
  N1lc  .5288(17)  .3687(2)  .4723(18)  .04500  Uiso  ?  ?  1.00000  ?  ?
  C1lc  .6060(17)  .36077(16)  .4746(18)  .04500  Uiso  ?  ?  1.00000  ?  ?
  C2lc  .4902(17)  .4069(2)  .4212(18)  .04500  Uiso  ?  ?  1.00000  ?  ?
  C3lc  .4775(17)  .3438(3)  .5226(18)  .04500  Uiso  ?  ?  1.00000  ?  ?
  O1ld  .7494(17)  .38178(12)  .2864(18)  .04500  Uiso  ?  ?  1.00000  ?  ?
  N1ld  .8673(17)  .3708(2)  .2580(18)  .04500  Uiso  ?  ?  1.00000  ?  ?
  C1ld  .7957(17)  .36115(17)  .2492(18)  .04500  Uiso  ?  ?  1.00000  ?  ?
  C2ld  .9025(17)  .4034(2)  .3239(18)  .04500  Uiso  ?  ?  1.00000  ?  ?
  C3ld  .9131(17)  .3381(3)  .2172(18)  .04500  Uiso  ?  ?  1.00000  ?  ?
  O1le  .6217(17)  .47219(10)  .3195(18)  .04500  Uiso  ?  ?  1.00000  ?  ?
  N1le  .5852(17)  .52819(18)  .2195(18)  .04500  Uiso  ?  ?  1.00000  ?  ?
  C1le  .6280(17)  .50818(12)  .2757(18)  .04500  Uiso  ?  ?  1.00000  ?  ?
  C2le  .5082(17)  .5011(2)  .1999(18)  .04500  Uiso  ?  ?  1.00000  ?  ?
  C3le  .5855(17)  .5763(2)  .1739(18)  .04500  Uiso  ?  ?  1.00000  ?  ?
  O1lf  .7790(17)  .46653(11)  .4209(18)  .04500  Uiso  ?  ?  1.00000  ?  ?
  N1lf  .8219(17)  .52882(18)  .5097(18)  .04500  Uiso  ?  ?  1.00000  ?  ?
  C1lf  .7671(17)  .51215(12)  .4543(18)  .04500  Uiso  ?  ?  1.00000  ?  ?
  C2lf  .7887(17)  .5741(2)  .5567(18)  .04500  Uiso  ?  ?  1.00000  ?  ?
  C3lf  .8917(17)  .5025(2)  .5187(18)  .04500  Uiso  ?  ?  1.00000  ?  ?
  H1lc  .6273(17)  .33583(18)  .5124(18)  .04500  Uiso  ?  ?  1.00000  ?  ?
  H1ld  .7774(17)  .33593(19)  .2104(18)  .04500  Uiso  ?  ?  1.00000  ?  ?
  H1le  .6754(17)  .52676(10)  .2837(18)  .04500  Uiso  ?  ?  1.00000  ?  ?
  H1lf  .7226(17)  .53373(10)  .4417(18)  .04500  Uiso  ?  ?  1.00000  ?  ?
  H2lda  .8649(17)  .42508(17)  .3441(18)  .04500  Uiso  ?  ?  1.00000  ?  ?
  H2ldb  .9401(17)  .4278(2)  .3087(18)  .04500  Uiso  ?  ?  1.00000  ?  ?
  H2ldc  .9248(17)  .3781(2)  .3607(18)  .04500  Uiso  ?  ?  1.00000  ?  ?
  H3lda  .9605(17)  .3562(3)  .2163(18)  .04500  Uiso  ?  ?  1.00000  ?  ?
  H3ldb  .8896(17)  .3338(3)  .1676(18)  .04500  Uiso  ?  ?  1.00000  ?  ?
  H3ldc  .9204(17)  .3021(3)  .2399(18)  .04500  Uiso  ?  ?  1.00000  ?  ?
  H3lca  .4351(17)  .3678(3)  .5247(18)  .04500  Uiso  ?  ?  1.00000  ?  ?
  H3lcb  .5035(17)  .3398(3)  .5712(18)  .04500  Uiso  ?  ?  1.00000  ?  ?
  H3lcc  .4609(17)  .3080(3)  .5042(18)  .04500  Uiso  ?  ?  1.00000  ?  ?
  H2lca  .5257(17)  .43085(18)  .4014(18)  .04500  Uiso  ?  ?  1.00000  ?  ?
  H2lcb  .4563(17)  .4289(3)  .4461(18)  .04500  Uiso  ?  ?  1.00000  ?  ?
  H2lcc  .4629(17)  .3865(2)  .3817(18)  .04500  Uiso  ?  ?  1.00000  ?  ?
  H2lea  .4719(17)  .5295(3)  .1857(18)  .04500  Uiso  ?  ?  1.00000  ?  ?
  H2leb  .4942(17)  .4815(2)  .2422(18)  .04500  Uiso  ?  ?  1.00000  ?  ?
  H2lec  .5104(17)  .4755(3)  .1598(18)  .04500  Uiso  ?  ?  1.00000  ?  ?
  H3lea  .5380(17)  .5947(2)  .1719(18)  .04500  Uiso  ?  ?  1.00000  ?  ?
  H3leb  .5946(17)  .5655(3)  .1250(18)  .04500  Uiso  ?  ?  1.00000  ?  ?
  H3lec  .6241(17)  .60130(18)  .1941(18)  .04500  Uiso  ?  ?  1.00000  ?  ?
  H3lfa  .9300(17)  .5297(3)  .5309(18)  .04500  Uiso  ?  ?  1.00000  ?  ?
  H3lfb  .9001(17)  .4841(2)  .4735(18)  .04500  Uiso  ?  ?  1.00000  ?  ?
  H3lfc  .8927(17)  .4755(3)  .5577(18)  .04500  Uiso  ?  ?  1.00000  ?  ?
  H2lfa  .8185(17)  .6072(2)  .5568(18)  .04500  Uiso  ?  ?  1.00000  ?  ?
  H2lfb  .7884(17)  .5609(3)  .6064(18)  .04500  Uiso  ?  ?  1.00000  ?  ?
  H2lfc  .7385(17)  .58228(18)  .5360(18)  .04500  Uiso  ?  ?  1.00000  ?  ?
  H2ba  .49789  .53592  .41263  .10000  Uiso  ?  ?  1.00000  ?  ?
  H2bb  .48537  .58244  .47034  .10000  Uiso  ?  ?  1.00000  ?  ?
  H2aa  .37944  .74018  .49546  .06000  Uiso  ?  ?  1.00000  ?  ?
  H2ab  .38958  .69266  .43842  .06000  Uiso  ?  ?  1.00000  ?  ?
  H2fa  .54070  .98276  .39665  .07500  Uiso  ?  ?  1.00000  ?  ?
  H2fb  .62644  .99571  .40520  .07500  Uiso  ?  ?  1.00000  ?  ?
  H2ea  .84914  .98956  .33129  .07500  Uiso  ?  ?  1.00000  ?  ?
  H2eb  .76205  .99317  .31504  .07500  Uiso  ?  ?  1.00000  ?  ?
  H2ca  1.01234  .75141  .23863  .06600  Uiso  ?  ?  1.00000  ?  ?
  H2cb  1.01010  .69780  .28745  .06000  Uiso  ?  ?  1.00000  ?  ?
  H2da  .90498  .58539  .25222  .07500  Uiso  ?  ?  1.00000  ?  ?
  H2db  .89773  .53636  .30779  .07500  Uiso  ?  ?  1.00000  ?  ?
  H1ca  1.01190  .79386  .36623  .09000  Uiso  ?  ?  1.00000  ?  ?
  H1cb  1.08490  .78351  .32891  .09000  Uiso  ?  ?  1.00000  ?  ?
  H1cc  1.05880  .73961  .38433  .09000  Uiso  ?  ?  1.00000  ?  ?
  H1fa  .56875  1.00202  .52035  .12000  Uiso  ?  ?  1.00000  ?  ?
  H1fb  .64104  .96527  .52606  .12000  Uiso  ?  ?  1.00000  ?  ?
  H1fc  .56224  .93691  .51769  .12000  Uiso  ?  ?  1.00000  ?  ?
  H1aa  .38599  .79186  .36776  .09000  Uiso  ?  ?  1.00000  ?  ?
  H1ab  .31414  .78599  .40826  .09000  Uiso  ?  ?  1.00000  ?  ?
  H1ac  .33168  .74149  .34964  .09000  Uiso  ?  ?  1.00000  ?  ?
  H1ea  .84369  .99396  .21137  .07500  Uiso  ?  ?  1.00000  ?  ?
  H1eb  .76271  .96934  .19964  .07500  Uiso  ?  ?  1.00000  ?  ?
  H1ec  .83135  .92952  .21692  .07500  Uiso  ?  ?  1.00000  ?  ?
  H1da  .77776  .55926  .19943  .03000  Uiso  ?  ?  1.00000  ?  ?
  H1db  .79364  .50289  .24172  .11000  Uiso  ?  ?  1.00000  ?  ?
  H1dc  .84289  .52062  .18003  .11000  Uiso  ?  ?  1.00000  ?  ?
  H7f  .59965  .91071  .09129  .06300  Uiso  ?  ?  1.00000  ?  ?
  H6f  .58610  .99365  .15227  .09000  Uiso  ?  ?  1.00000  ?  ?
  H5f  .58771  .99534  .28662  .06000  Uiso  ?  ?  1.00000  ?  ?
  H5e  .80949  .99737  .44789  .09000  Uiso  ?  ?  1.00000  ?  ?
  H6e  .80869  .99566  .57050  .11000  Uiso  ?  ?  1.00000  ?  ?
  H7e  .78060  .91318  .62923  .09000  Uiso  ?  ?  1.00000  ?  ?
  H5a  .44185  .68640  .56894  .05300  Uiso  ?  ?  1.00000  ?  ?
  H6a  .51473  .64507  .66787  .07500  Uiso  ?  ?  1.00000  ?  ?
  H7a  .64797  .64241  .67337  .06000  Uiso  ?  ?  1.00000  ?  ?
  H5b  .41173  .59123  .35569  .05700  Uiso  ?  ?  1.00000  ?  ?
  H6b  .34424  .63309  .26121  .07500  Uiso  ?  ?  1.00000  ?  ?
  H7b  .39411  .68751  .17595  .05500  Uiso  ?  ?  1.00000  ?  ?
  H7c  .75271  .65386  .04624  .05000  Uiso  ?  ?  1.00000  ?  ?
  H6c  .88171  .63904  .06389  .06200  Uiso  ?  ?  1.00000  ?  ?
  H5c  .95132  .67940  .16717  .06300  Uiso  ?  ?  1.00000  ?  ?
  H7d  1.00897  .69897  .55263  .06000  Uiso  ?  ?  1.00000  ?  ?
  H6d  1.05802  .62724  .47899  .06600  Uiso  ?  ?  1.00000  ?  ?
  H5d  .97862  .59516  .37103  .06000  Uiso  ?  ?  1.00000  ?  ?
  H1ba  .59826  .55507  .54030  .12000  Uiso  ?  ?  1.00000  ?  ?
  H1bb  .60312  .50611  .48410  .12000  Uiso  ?  ?  1.00000  ?  ?
  H1bc  .53883  .50716  .53531  .12000  Uiso  ?  ?  1.00000  ?  ?
 
loop_
_atom_site_aniso_label
_atom_site_aniso_U_11
_atom_site_aniso_U_22
_atom_site_aniso_U_33
_atom_site_aniso_U_12
_atom_site_aniso_U_13
_atom_site_aniso_U_23
  Ti1  .0187(10)  .0225(13)  .0320(14)  -.0018(10)  -.0054(10)  .0011(11)
  Ti2  .0339(13)  .0153(11)  .0205(12)  .0002(10)  -.0123(11)  -.0025(10)
  O2a  .027(3)  .018(3)  .021(4)  .002(2)  -.010(2)  .005(3)
  O3c  .033(4)  .023(3)  .030(4)  .001(3)  -.006(3)  -.013(3)
  O1a  .020(4)  .038(6)  .049(7)  -.000(4)  -.002(4)  .008(5)
  O1b  .040(6)  .024(5)  .046(7)  .003(5)  -.012(5)  .011(5)
  O2e  .028(5)  .010(4)  .045(6)  -.000(4)  -.014(4)  -.005(4)
  C8d  .031(7)  .035(8)  .033(8)  .011(6)  -.007(6)  -.005(7)
  C8e  .025(6)  .017(6)  .043(9)  -.004(5)  -.013(6)  -.012(6)
  O2b  .007(3)  .029(5)  .030(5)  .004(4)  -.007(3)  .004(4)
  O2d  .050(6)  .011(4)  .028(5)  .009(4)  -.009(4)  .002(4)
  O1f  .064(6)  .018(5)  .011(4)  .005(5)  -.019(4)  -.002(4)
  O3d  .034(4)  .037(4)  .044(5)  .002(3)  -.020(3)  -.004(3)
  O1c  .039(5)  .020(4)  .030(5)  -.005(4)  -.014(4)  -.001(4)
  C3b  .017(6)  .034(8)  .052(9)  .004(5)  .010(6)  -.009(7)
  C9e  .036(6)  .006(4)  .049(7)  -.006(3)  -.021(4)  -.004(4)
  C6b  .014(5)  .052(10)  .071(12)  -.014(6)  .007(6)  -.017(9)
  O1e  .023(4)  .027(5)  .062(7)  -.005(4)  -.001(5)  -.001(5)
  C9d  .021(6)  .017(6)  .027(8)  .002(5)  .003(5)  -.003(6)
  O3f  .032(5)  .021(5)  .049(6)  -.001(4)  -.007(5)  -.007(5)
  C4f  .051(9)  .024(8)  .036(9)  .004(7)  -.015(7)  .003(7)
  C7e  .070(12)  .017(8)  .100(14)  -.012(8)  -.002(10)  -.012(8)
  O1d  .048(6)  .020(5)  .046(7)  .005(5)  -.002(5)  -.002(5)
  C9c  .006(5)  .027(7)  .048(8)  .003(4)  .004(5)  -.002(6)
  C4c  .027(7)  .026(7)  .046(9)  .005(6)  -.004(7)  -.019(7)
  O2f  .039(5)  .023(5)  .011(4)  .006(4)  -.003(4)  -.007(4)
  C3f  .028(7)  .022(8)  .047(9)  -.004(6)  -.007(6)  -.004(7)
  C8a  .025(6)  .012(6)  .040(8)  -.003(5)  .003(6)  .000(6)
  C7b  .032(8)  .044(10)  .048(10)  .010(7)  -.007(7)  -.008(8)
  C8c  .037(7)  .026(7)  .022(7)  -.007(6)  -.013(6)  -.007(6)
  C9a  .059(8)  .002(4)  .016(6)  .002(5)  -.009(6)  -.002(4)
  C3a  .013(5)  .018(6)  .054(9)  .003(5)  .002(6)  .002(7)
  C3c  .038(8)  .025(8)  .031(8)  -.001(6)  -.016(7)  .005(7)
  C5d  .020(6)  .020(7)  .080(12)  .006(5)  .005(7)  -.012(7)
  C5a  .020(6)  .038(9)  .050(10)  -.010(6)  .003(6)  .006(8)
  C4b  .028(6)  .016(6)  .041(8)  .010(5)  -.017(6)  -.001(5)
  C3e  .047(9)  .026(8)  .022(7)  -.007(7)  -.013(6)  .002(6)
  C4d  .036(7)  .017(6)  .039(8)  .008(5)  .008(6)  .001(6)
  C7c  .029(7)  .034(8)  .035(8)  -.006(6)  -.002(6)  -.021(7)
  C2b  .022(6)  .060(11)  .092(14)  .009(7)  .022(8)  .024(10)
  C1b  .097(15)  .049(11)  .084(15)  .007(11)  -.007(12)  .041(11)
  C1e  .078(11)  .059(11)  .034(9)  -.018(9)  -.005(8)  .017(8)
  C2a  .042(8)  .022(6)  .046(9)  -.001(6)  -.028(7)  .013(6)
  C5f  .050(9)  .035(9)  .053(10)  .018(7)  -.001(8)  -.008(8)
  C5c  .032(8)  .042(9)  .053(11)  -.014(7)  -.013(7)  -.012(8)
  C1a  .028(7)  .039(6)  .052(10)  .005(5)  -.008(7)  .006(6)
  C4e  .030(7)  .011(6)  .052(10)  -.000(5)  -.005(7)  .009(6)
  C9b  .026(7)  .024(8)  .043(10)  -.000(6)  -.009(6)  -.013(7)
  C6c  .046(9)  .030(7)  .041(9)  .001(7)  -.012(7)  -.014(7)
  C7a  .036(8)  .035(9)  .051(10)  .000(7)  -.007(7)  .006(8)
  C6a  .034(9)  .065(12)  .064(12)  -.004(8)  .009(8)  .037(10)
  C4a  .029(7)  .025(7)  .028(8)  .002(6)  -.005(6)  -.005(6)
  C5e  .104(14)  .015(7)  .037(9)  .003(8)  -.016(9)  -.009(7)
  C5b  .045(8)  .037(8)  .032(8)  -.016(7)  -.000(7)  -.012(7)
  C2e  .081(12)  .023(7)  .030(8)  -.013(8)  -.003(7)  -.003(6)
  C2f  .088(12)  .027(8)  .038(9)  .010(8)  -.023(8)  -.011(7)
  C2c  .019(6)  .068(11)  .055(11)  .010(7)  .013(6)  .003(9)
  C7d  .014(6)  .029(7)  .053(10)  .010(5)  -.008(6)  .008(7)
  C1f  .116(15)  .021(7)  .050(11)  .020(9)  -.016(10)  -.012(7)
  O3e  .050(6)  .023(5)  .011(4)  -.002(5)  -.012(4)  -.009(4)
  C1c  .014(6)  .17(2)  .072(13)  .008(9)  -.014(7)  -.047(13)
  Li4  .025(6)  .031(7)  .056(11)  -.006(12)  -.003(6)  .035(13)
  C2d  .084(12)  .020(7)  .044(9)  .011(7)  -.006(8)  -.008(7)
  Li3  .036(7)  .031(6)  .034(10)  .003(13)  -.015(6)  .011(13)
  C8b  .018(6)  .017(6)  .032(7)  .006(5)  -.005(5)  -.013(6)
  C7f  .093(13)  .028(8)  .005(5)  .006(8)  -.018(7)  .002(5)
  C3d  .052(8)  .006(5)  .042(8)  -.001(5)  -.016(7)  -.004(5)
  C8f  .048(8)  .030(8)  .025(8)  -.007(7)  -.010(7)  -.007(6)
  C6d  .043(8)  .041(9)  .040(9)  -.001(6)  -.018(6)  -.005(7)
  C1d  .066(11)  .063(12)  .051(10)  .006(9)  .010(9)  -.015(10)
 
 
# 5. Molecular Geometry
#----------------------
 
loop_
_geom_bond_atom_site_label_1
_geom_bond_atom_site_label_2
_geom_bond_site_symmetry_1
_geom_bond_site_symmetry_2
_geom_bond_distance
_geom_bond_publ_flag                 #<< enter y(es) for value to be published
  Ti1  O3a  .  .  1.90(4)  ?
  Ti1  O3e  .  .  1.92(3)  ?
  Ti1  O3d  .  .  1.94(4)  ?
  Ti1  O2a  .  .  1.96(4)  ?
  Ti1  O2d  .  .  2.04(4)  ?
  Ti1  O2e  .  .  2.05(3)  ?
  Ti2  O3b  .  .  1.84(4)  ?
  Ti2  O3f  .  .  1.88(3)  ?
  Ti2  O3c  .  .  1.91(4)  ?
  Ti2  O2b  .  .  2.01(4)  ?
  Ti2  O2f  .  .  2.02(3)  ?
  Ti2  O2c  .  .  2.10(4)  ?
  O2a  C9a  .  .  1.34(4)  ?
  O2a  Li1  .  .  1.97(4)  ?
  O3c  C8c  .  .  1.33(4)  ?
  O1a  C3a  .  .  1.26(4)  ?
  O1a  Li1  .  .  1.98(5)  ?
  O1b  C3b  .  .  1.18(4)  ?
  O1b  Li3  .  .  1.95(5)  ?
  O2e  C9e  .  .  1.33(3)  ?
  O2e  Li2  .  .  1.92(5)  ?
  C8d  O3d  .  .  1.38(4)  ?
  C8d  C7d  .  .  1.39(4)  ?
  C8d  C9d  .  .  1.40(4)  ?
  C8e  O3e  .  .  1.30(3)  ?
  C8e  C9e  .  .  1.35(5)  ?
  C8e  C7e  .  .  1.42(3)  ?
  O2b  C9b  .  .  1.35(4)  ?
  O2b  Li3  .  .  2.03(5)  ?
  O2d  C9d  .  .  1.31(4)  ?
  O2d  Li3  .  .  1.90(5)  ?
  O1f  C3f  .  .  1.19(3)  ?
  O1f  Li1  .  .  1.88(3)  ?
  O1c  C3c  .  .  1.23(4)  ?
  O1c  Li2  .  .  1.86(5)  ?
  C3b  C2b  .  .  1.52(4)  ?
  C3b  C4b  .  .  1.58(4)  ?
  C9e  C4e  .  .  1.48(3)  ?
  C6b  H6b  .  .  .95(3)  ?
  C6b  C5b  .  .  1.31(4)  ?
  C6b  C7b  .  .  1.43(4)  ?
  O1e  C3e  .  .  1.27(3)  ?
  O1e  Li2  .  .  1.95(3)  ?
  C9d  C4d  .  .  1.48(4)  ?
  O3f  C8f  .  .  1.39(3)  ?
  C4f  C9f  .  .  1.35(3)  ?
  C4f  C5f  .  .  1.44(3)  ?
  C4f  C3f  .  .  1.48(5)  ?
  C7e  H7e  .  .  .85(4)  ?
  C7e  C6e  .  .  1.37(3)  ?
  O1d  C3d  .  .  1.30(4)  ?
  O1d  Li3  .  .  1.94(5)  ?
  C9c  O2c  .  .  1.36(4)  ?
  C9c  C8c  .  .  1.45(4)  ?
  C9c  C4c  .  .  1.45(5)  ?
  C4c  C3c  .  .  1.44(4)  ?
  C4c  C5c  .  .  1.45(5)  ?
  O2f  C9f  .  .  1.37(2)  ?
  O2f  Li1  .  .  1.92(5)  ?
  C3f  C2f  .  .  1.49(3)  ?
  C8a  C7a  .  .  1.35(5)  ?
  C8a  O3a  .  .  1.36(4)  ?
  C8a  C9a  .  .  1.40(4)  ?
  C7b  H7b  .  .  .89(3)  ?
  C7b  C8b  .  .  1.36(4)  ?
  C8c  C7c  .  .  1.40(5)  ?
  C9a  C4a  .  .  1.36(5)  ?
  C3a  C2a  .  .  1.53(5)  ?
  C3a  C4a  .  .  1.53(4)  ?
  C3c  C2c  .  .  1.48(5)  ?
  C5d  H5d  .  .  .95(3)  ?
  C5d  C4d  .  .  1.40(4)  ?
  C5d  C6d  .  .  1.42(4)  ?
  C5a  H5a  .  .  .97(3)  ?
  C5a  C6a  .  .  1.35(4)  ?
  C5a  C4a  .  .  1.36(5)  ?
  C4b  C9b  .  .  1.31(4)  ?
  C4b  C5b  .  .  1.47(4)  ?
  C3e  C4e  .  .  1.47(5)  ?
  C3e  C2e  .  .  1.55(3)  ?
  C4d  C3d  .  .  1.37(4)  ?
  C7c  H7c  .  .  .93(3)  ?
  C7c  C6c  .  .  1.35(5)  ?
  C2b  H2bb  .  .  .97(3)  ?
  C2b  H2ba  .  .  .97(3)  ?
  C2b  C1b  .  .  1.46(4)  ?
  C1b  H1bb  .  .  .90(3)  ?
  C1b  H1ba  .  .  .94(3)  ?
  C1b  H1bc  .  .  1.04(4)  ?
  C1e  H1eb  .  .  .85(3)  ?
  C1e  H1ea  .  .  .98(3)  ?
  C1e  H1ec  .  .  1.03(2)  ?
  C1e  C2e  .  .  1.47(5)  ?
  C2a  H2aa  .  .  .95(4)  ?
  C2a  H2ab  .  .  .989(15)  ?
  C2a  C1a  .  .  1.48(4)  ?
  C5f  H5f  .  .  .96(2)  ?
  C5f  C6f  .  .  1.35(5)  ?
  C5c  H5c  .  .  .94(3)  ?
  C5c  C6c  .  .  1.41(4)  ?
  C1a  H1ac  .  .  .92(3)  ?
  C1a  H1aa  .  .  .96(3)  ?
  C1a  H1ab  .  .  .98(3)  ?
  C4e  C5e  .  .  1.40(3)  ?
  C9b  C8b  .  .  1.45(4)  ?
  C6c  H6c  .  .  .92(3)  ?
  C7a  H7a  .  .  .97(3)  ?
  C7a  C6a  .  .  1.44(5)  ?
  C6a  H6a  .  .  .99(3)  ?
  C5e  H5e  .  .  .92(2)  ?
  C5e  C6e  .  .  1.44(5)  ?
  C5b  H5b  .  .  .97(3)  ?
  C2e  H2eb  .  .  .95(3)  ?
  C2e  H2ea  .  .  .99(3)  ?
  C2f  H2fa  .  .  .92(3)  ?
  C2f  H2fb  .  .  .93(3)  ?
  C2f  C1f  .  .  1.57(5)  ?
  C2c  H2ca  .  .  .92(3)  ?
  C2c  H2cb  .  .  .92(2)  ?
  C2c  C1c  .  .  1.56(4)  ?
  C7d  H7d  .  .  1.01(3)  ?
  C7d  C6d  .  .  1.37(4)  ?
  C1f  H1fc  .  .  .84(3)  ?
  C1f  H1fa  .  .  .97(2)  ?
  C1f  H1fb  .  .  1.10(3)  ?
  C1c  H1ca  .  .  .89(3)  ?
  C1c  H1cb  .  .  .90(3)  ?
  C1c  H1cc  .  .  1.03(3)  ?
  C2d  H2db  .  .  .90(3)  ?
  C2d  H2da  .  .  .93(3)  ?
  C2d  C3d  .  .  1.51(4)  ?
  C2d  C1d  .  .  1.56(4)  ?
  C8b  O3b  .  .  1.31(4)  ?
  C7f  H7f  .  .  1.01(3)  ?
  C7f  C8f  .  .  1.30(3)  ?
  C7f  C6f  .  .  1.44(3)  ?
  C8f  C9f  .  .  1.47(5)  ?
  C6d  H6d  .  .  .96(3)  ?
  C1d  H1dc  .  .  .95(4)  ?
  C1d  H1db  .  .  .96(3)  ?
  C1d  H1da  .  .  .97(3)  ?
  O2c  Li2  .  .  1.89(4)  ?
  C6e  H6e  .  .  .96(2)  ?
  C6f  H6f  .  .  .98(2)  ?
  Li4  O1lc  .  .  1.91(5)  ?
  Li4  O1ld  .  .  1.92(5)  ?
  Li4  O1le  .  .  1.93(4)  ?
  Li4  O1lf  .  .  2.03(4)  ?
  O1lc  C1lc  .  .  1.23(4)  ?
  N1lc  C1lc  .  .  1.39(4)  ?
  N1lc  C2lc  .  .  1.41(3)  ?
  N1lc  C3lc  .  .  1.48(4)  ?
  C1lc  H1lc  .  .  .95(3)  ?
  C2lc  H2lcb  .  .  .95(4)  ?
  C2lc  H2lcc  .  .  .95(4)  ?
  C2lc  H2lca  .  .  .95(4)  ?
  C3lc  H3lcb  .  .  .95(4)  ?
  C3lc  H3lcc  .  .  .95(2)  ?
  C3lc  H3lca  .  .  .95(3)  ?
  O1ld  C1ld  .  .  1.22(4)  ?
  N1ld  C1ld  .  .  1.29(4)  ?
  N1ld  C3ld  .  .  1.40(4)  ?
  N1ld  C2ld  .  .  1.50(4)  ?
  C1ld  H1ld  .  .  .95(3)  ?
  C2ld  H2ldc  .  .  .95(3)  ?
  C2ld  H2ldb  .  .  .95(4)  ?
  C2ld  H2lda  .  .  .95(4)  ?
  C3ld  H3ldb  .  .  .95(4)  ?
  C3ld  H3lda  .  .  .95(4)  ?
  C3ld  H3ldc  .  .  .95(2)  ?
  O1le  C1le  .  .  1.18(3)  ?
  N1le  C1le  .  .  1.29(4)  ?
  N1le  C3le  .  .  1.41(3)  ?
  N1le  C2le  .  .  1.52(4)  ?
  C1le  H1le  .  .  .95(4)  ?
  C2le  H2lec  .  .  .95(4)  ?
  C2le  H2leb  .  .  .95(4)  ?
  C2le  H2lea  .  .  .95(3)  ?
  C3le  H3lea  .  .  .95(4)  ?
  C3le  H3lec  .  .  .95(3)  ?
  C3le  H3leb  .  .  .95(4)  ?
  O1lf  C1lf  .  .  1.27(2)  ?
  N1lf  C1lf  .  .  1.38(4)  ?
  N1lf  C3lf  .  .  1.39(4)  ?
  N1lf  C2lf  .  .  1.53(3)  ?
  C1lf  H1lf  .  .  .95(3)  ?
  C2lf  H2lfa  .  .  .95(2)  ?
  C2lf  H2lfc  .  .  .95(4)  ?
  C2lf  H2lfb  .  .  .95(4)  ?
  C3lf  H3lfa  .  .  .95(3)  ?
  C3lf  H3lfb  .  .  .95(4)  ?
  C3lf  H3lfc  .  .  .95(3)  ?
  O1la  C1la  .  .  1.16(4)  ?
  N1la  C3la  .  .  1.16(4)  ?
  N1la  C1la  .  .  1.38(3)  ?
  N1la  C2la  .  .  1.51(3)  ?
  C1la  H1la  .  .  .95(4)  ?
  C2la  H2lab  .  .  .95(4)  ?
  C2la  H2lac  .  .  .95(4)  ?
  C2la  H2laa  .  .  .95(4)  ?
  C3la  H3laa  .  .  .95(3)  ?
  C3la  H3lac  .  .  .95(5)  ?
  C3la  H3lab  .  .  .95(4)  ?
  O1lb  C1lb  .  .  1.34(4)  ?
  N1lb  C1lb  .  .  1.29(4)  ?
  N1lb  C3lb  .  .  1.42(3)  ?
  N1lb  C2lb  .  .  1.63(4)  ?
  C1lb  H1lb  .  .  .95(4)  ?
  C2lb  H2lba  .  .  .95(2)  ?
  C2lb  H2lbc  .  .  .95(4)  ?
  C2lb  H2lbb  .  .  .95(4)  ?
  C3lb  H3lbb  .  .  .95(4)  ?
  C3lb  H3lba  .  .  .95(4)  ?
  C3lb  H3lbc  .  .  .95(4)  ?
 
loop_
_geom_angle_atom_site_label_1
_geom_angle_atom_site_label_2
_geom_angle_atom_site_label_3
_geom_angle_site_symmetry_1
_geom_angle_site_symmetry_2
_geom_angle_site_symmetry_3
_geom_angle
_geom_angle_publ_flag                #<< enter yes for value to be published
  O3a  Ti1  O3e  .  .  .  94.2(18)  ?
  O3a  Ti1  O3d  .  .  .  93.3(16)  ?
  O3a  Ti1  O2a  .  .  .  80.0(16)  ?
  O3a  Ti1  O2d  .  .  .  101.8(9)  ?
  O3a  Ti1  O2e  .  .  .  164(2)  ?
  O3e  Ti1  O3d  .  .  .  91.9(16)  ?
  O3e  Ti1  O2a  .  .  .  103.3(16)  ?
  O3e  Ti1  O2d  .  .  .  161(2)  ?
  O3e  Ti1  O2e  .  .  .  79.4(11)  ?
  O3d  Ti1  O2a  .  .  .  163.7(7)  ?
  O3d  Ti1  O2d  .  .  .  76.8(15)  ?
  O3d  Ti1  O2e  .  .  .  101.0(17)  ?
  O2a  Ti1  O2d  .  .  .  90.0(15)  ?
  O2a  Ti1  O2e  .  .  .  87.7(15)  ?
  O2d  Ti1  O2e  .  .  .  87.6(16)  ?
  O3b  Ti2  O3f  .  .  .  93.4(16)  ?
  O3b  Ti2  O3c  .  .  .  96.8(16)  ?
  O3b  Ti2  O2b  .  .  .  81.2(16)  ?
  O3b  Ti2  O2f  .  .  .  102.2(18)  ?
  O3b  Ti2  O2c  .  .  .  165.2(9)  ?
  O3f  Ti2  O3c  .  .  .  93.3(18)  ?
  O3f  Ti2  O2b  .  .  .  164(2)  ?
  O3f  Ti2  O2f  .  .  .  80.2(11)  ?
  O3f  Ti2  O2c  .  .  .  100.9(16)  ?
  O3c  Ti2  O2b  .  .  .  102.2(10)  ?
  O3c  Ti2  O2f  .  .  .  160(2)  ?
  O3c  Ti2  O2c  .  .  .  78.8(16)  ?
  O2b  Ti2  O2f  .  .  .  86.2(16)  ?
  O2b  Ti2  O2c  .  .  .  85.9(15)  ?
  O2f  Ti2  O2c  .  .  .  84.1(15)  ?
  C9a  O2a  Ti1  .  .  .  118(2)  ?
  C9a  O2a  Li1  .  .  .  123(2)  ?
  Ti1  O2a  Li1  .  .  .  116.1(17)  ?
  C8c  O3c  Ti2  .  .  .  122(2)  ?
  C3a  O1a  Li1  .  .  .  129(3)  ?
  C3b  O1b  Li3  .  .  .  134(2)  ?
  C9e  O2e  Li2  .  .  .  126(2)  ?
  C9e  O2e  Ti1  .  .  .  110(2)  ?
  Li2  O2e  Ti1  .  .  .  120.0(12)  ?
  O3d  C8d  C7d  .  .  .  124(3)  ?
  O3d  C8d  C9d  .  .  .  111(3)  ?
  C7d  C8d  C9d  .  .  .  125(3)  ?
  O3e  C8e  C9e  .  .  .  116(2)  ?
  O3e  C8e  C7e  .  .  .  122(3)  ?
  C9e  C8e  C7e  .  .  .  121(2)  ?
  C9b  O2b  Ti2  .  .  .  114(2)  ?
  C9b  O2b  Li3  .  .  .  122(2)  ?
  Ti2  O2b  Li3  .  .  .  123(2)  ?
  C9d  O2d  Li3  .  .  .  125(2)  ?
  C9d  O2d  Ti1  .  .  .  116(2)  ?
  Li3  O2d  Ti1  .  .  .  117(2)  ?
  C3f  O1f  Li1  .  .  .  132(3)  ?
  C8d  O3d  Ti1  .  .  .  120(2)  ?
  C3c  O1c  Li2  .  .  .  132(3)  ?
  O1b  C3b  C2b  .  .  .  121(3)  ?
  O1b  C3b  C4b  .  .  .  121(3)  ?
  C2b  C3b  C4b  .  .  .  117(3)  ?
  O2e  C9e  C8e  .  .  .  117(2)  ?
  O2e  C9e  C4e  .  .  .  123(3)  ?
  C8e  C9e  C4e  .  .  .  120(2)  ?
  H6b  C6b  C5b  .  .  .  116(3)  ?
  H6b  C6b  C7b  .  .  .  118(3)  ?
  C5b  C6b  C7b  .  .  .  126(3)  ?
  C3e  O1e  Li2  .  .  .  127(3)  ?
  O2d  C9d  C8d  .  .  .  116(3)  ?
  O2d  C9d  C4d  .  .  .  125(3)  ?
  C8d  C9d  C4d  .  .  .  119(3)  ?
  C8f  O3f  Ti2  .  .  .  119(3)  ?
  C9f  C4f  C5f  .  .  .  116(3)  ?
  C9f  C4f  C3f  .  .  .  125(2)  ?
  C5f  C4f  C3f  .  .  .  119(2)  ?
  H7e  C7e  C6e  .  .  .  117(2)  ?
  H7e  C7e  C8e  .  .  .  120(3)  ?
  C6e  C7e  C8e  .  .  .  119(3)  ?
  C3d  O1d  Li3  .  .  .  129(2)  ?
  O2c  C9c  C8c  .  .  .  118(3)  ?
  O2c  C9c  C4c  .  .  .  122(3)  ?
  C8c  C9c  C4c  .  .  .  120(3)  ?
  C3c  C4c  C5c  .  .  .  121(3)  ?
  C3c  C4c  C9c  .  .  .  125(3)  ?
  C5c  C4c  C9c  .  .  .  115(3)  ?
  C9f  O2f  Li1  .  .  .  119(2)  ?
  C9f  O2f  Ti2  .  .  .  115(2)  ?
  Li1  O2f  Ti2  .  .  .  124.2(12)  ?
  O1f  C3f  C4f  .  .  .  120(2)  ?
  O1f  C3f  C2f  .  .  .  124(3)  ?
  C4f  C3f  C2f  .  .  .  116(2)  ?
  C7a  C8a  O3a  .  .  .  120(3)  ?
  C7a  C8a  C9a  .  .  .  121(3)  ?
  O3a  C8a  C9a  .  .  .  118(3)  ?
  H7b  C7b  C8b  .  .  .  127(3)  ?
  H7b  C7b  C6b  .  .  .  115(3)  ?
  C8b  C7b  C6b  .  .  .  117(3)  ?
  O3c  C8c  C7c  .  .  .  129(3)  ?
  O3c  C8c  C9c  .  .  .  110(3)  ?
  C7c  C8c  C9c  .  .  .  120(3)  ?
  O2a  C9a  C4a  .  .  .  131(3)  ?
  O2a  C9a  C8a  .  .  .  109(3)  ?
  C4a  C9a  C8a  .  .  .  119(3)  ?
  O1a  C3a  C2a  .  .  .  120(3)  ?
  O1a  C3a  C4a  .  .  .  124(3)  ?
  C2a  C3a  C4a  .  .  .  116(2)  ?
  O1c  C3c  C4c  .  .  .  121(3)  ?
  O1c  C3c  C2c  .  .  .  119(3)  ?
  C4c  C3c  C2c  .  .  .  120(3)  ?
  H5d  C5d  C4d  .  .  .  114(3)  ?
  H5d  C5d  C6d  .  .  .  116(3)  ?
  C4d  C5d  C6d  .  .  .  130(3)  ?
  H5a  C5a  C6a  .  .  .  119(3)  ?
  H5a  C5a  C4a  .  .  .  122(3)  ?
  C6a  C5a  C4a  .  .  .  118(3)  ?
  C9b  C4b  C5b  .  .  .  123(3)  ?
  C9b  C4b  C3b  .  .  .  121(3)  ?
  C5b  C4b  C3b  .  .  .  115(2)  ?
  O1e  C3e  C4e  .  .  .  125(2)  ?
  O1e  C3e  C2e  .  .  .  115(3)  ?
  C4e  C3e  C2e  .  .  .  120(2)  ?
  C3d  C4d  C5d  .  .  .  124(3)  ?
  C3d  C4d  C9d  .  .  .  125(3)  ?
  C5d  C4d  C9d  .  .  .  111(3)  ?
  H7c  C7c  C6c  .  .  .  120(3)  ?
  H7c  C7c  C8c  .  .  .  117(3)  ?
  C6c  C7c  C8c  .  .  .  123(3)  ?
  H2bb  C2b  H2ba  .  .  .  105(3)  ?
  H2bb  C2b  C1b  .  .  .  111(3)  ?
  H2bb  C2b  C3b  .  .  .  106.2(18)  ?
  H2ba  C2b  C1b  .  .  .  109.9(18)  ?
  H2ba  C2b  C3b  .  .  .  107(3)  ?
  C1b  C2b  C3b  .  .  .  116(3)  ?
  H1bb  C1b  H1ba  .  .  .  115(4)  ?
  H1bb  C1b  H1bc  .  .  .  106.2(19)  ?
  H1bb  C1b  C2b  .  .  .  113(4)  ?
  H1ba  C1b  H1bc  .  .  .  103(4)  ?
  H1ba  C1b  C2b  .  .  .  112(2)  ?
  H1bc  C1b  C2b  .  .  .  108(3)  ?
  H1eb  C1e  H1ea  .  .  .  116(3)  ?
  H1eb  C1e  H1ec  .  .  .  111(3)  ?
  H1eb  C1e  C2e  .  .  .  115(4)  ?
  H1ea  C1e  H1ec  .  .  .  101(3)  ?
  H1ea  C1e  C2e  .  .  .  108(3)  ?
  H1ec  C1e  C2e  .  .  .  104(2)  ?
  H2aa  C2a  H2ab  .  .  .  106(3)  ?
  H2aa  C2a  C1a  .  .  .  112(3)  ?
  H2aa  C2a  C3a  .  .  .  110(3)  ?
  H2ab  C2a  C1a  .  .  .  107(3)  ?
  H2ab  C2a  C3a  .  .  .  107(2)  ?
  C1a  C2a  C3a  .  .  .  113(3)  ?
  H5f  C5f  C6f  .  .  .  119(2)  ?
  H5f  C5f  C4f  .  .  .  116(3)  ?
  C6f  C5f  C4f  .  .  .  123(2)  ?
  H5c  C5c  C6c  .  .  .  120(3)  ?
  H5c  C5c  C4c  .  .  .  115(3)  ?
  C6c  C5c  C4c  .  .  .  125(3)  ?
  H1ac  C1a  H1aa  .  .  .  112(4)  ?
  H1ac  C1a  H1ab  .  .  .  109(3)  ?
  H1ac  C1a  C2a  .  .  .  113.2(15)  ?
  H1aa  C1a  H1ab  .  .  .  106.1(13)  ?
  H1aa  C1a  C2a  .  .  .  109(3)  ?
  H1ab  C1a  C2a  .  .  .  108(3)  ?
  C5e  C4e  C3e  .  .  .  120(2)  ?
  C5e  C4e  C9e  .  .  .  119(3)  ?
  C3e  C4e  C9e  .  .  .  122(2)  ?
  C4b  C9b  O2b  .  .  .  130(3)  ?
  C4b  C9b  C8b  .  .  .  119(3)  ?
  O2b  C9b  C8b  .  .  .  110(2)  ?
  H6c  C6c  C7c  .  .  .  122(3)  ?
  H6c  C6c  C5c  .  .  .  120(3)  ?
  C7c  C6c  C5c  .  .  .  118(3)  ?
  H7a  C7a  C8a  .  .  .  124(3)  ?
  H7a  C7a  C6a  .  .  .  118(3)  ?
  C8a  C7a  C6a  .  .  .  116(3)  ?
  H6a  C6a  C5a  .  .  .  120(3)  ?
  H6a  C6a  C7a  .  .  .  117(3)  ?
  C5a  C6a  C7a  .  .  .  122(3)  ?
  C5a  C4a  C9a  .  .  .  122(3)  ?
  C5a  C4a  C3a  .  .  .  119(3)  ?
  C9a  C4a  C3a  .  .  .  119(3)  ?
  H5e  C5e  C4e  .  .  .  124(4)  ?
  H5e  C5e  C6e  .  .  .  116(2)  ?
  C4e  C5e  C6e  .  .  .  118(2)  ?
  H5b  C5b  C6b  .  .  .  120(3)  ?
  H5b  C5b  C4b  .  .  .  125(3)  ?
  C6b  C5b  C4b  .  .  .  114(3)  ?
  H2eb  C2e  H2ea  .  .  .  106(2)  ?
  H2eb  C2e  C1e  .  .  .  107(3)  ?
  H2eb  C2e  C3e  .  .  .  107(3)  ?
  H2ea  C2e  C1e  .  .  .  112(3)  ?
  H2ea  C2e  C3e  .  .  .  108(3)  ?
  C1e  C2e  C3e  .  .  .  116(2)  ?
  H2fa  C2f  H2fb  .  .  .  114(2)  ?
  H2fa  C2f  C3f  .  .  .  108(3)  ?
  H2fa  C2f  C1f  .  .  .  102(3)  ?
  H2fb  C2f  C3f  .  .  .  111(3)  ?
  H2fb  C2f  C1f  .  .  .  112(3)  ?
  C3f  C2f  C1f  .  .  .  108(2)  ?
  H2ca  C2c  H2cb  .  .  .  115(3)  ?
  H2ca  C2c  C3c  .  .  .  107(3)  ?
  H2ca  C2c  C1c  .  .  .  104(2)  ?
  H2cb  C2c  C3c  .  .  .  108(2)  ?
  H2cb  C2c  C1c  .  .  .  110(3)  ?
  C3c  C2c  C1c  .  .  .  114(3)  ?
  H7d  C7d  C6d  .  .  .  123(3)  ?
  H7d  C7d  C8d  .  .  .  118(3)  ?
  C6d  C7d  C8d  .  .  .  119(3)  ?
  H1fc  C1f  H1fa  .  .  .  117(4)  ?
  H1fc  C1f  H1fb  .  .  .  105(3)  ?
  H1fc  C1f  C2f  .  .  .  120(3)  ?
  H1fa  C1f  H1fb  .  .  .  97(2)  ?
  H1fa  C1f  C2f  .  .  .  110(2)  ?
  H1fb  C1f  C2f  .  .  .  104(3)  ?
  C8e  O3e  Ti1  .  .  .  116(3)  ?
  H1ca  C1c  H1cb  .  .  .  120(3)  ?
  H1ca  C1c  H1cc  .  .  .  107(4)  ?
  H1ca  C1c  C2c  .  .  .  111(3)  ?
  H1cb  C1c  H1cc  .  .  .  106(3)  ?
  H1cb  C1c  C2c  .  .  .  108(3)  ?
  H1cc  C1c  C2c  .  .  .  102(2)  ?
  H2db  C2d  H2da  .  .  .  116(4)  ?
  H2db  C2d  C3d  .  .  .  108(3)  ?
  H2db  C2d  C1d  .  .  .  106.3(17)  ?
  H2da  C2d  C3d  .  .  .  108.4(15)  ?
  H2da  C2d  C1d  .  .  .  105(3)  ?
  C3d  C2d  C1d  .  .  .  113(3)  ?
  O2d  Li3  O1d  .  .  .  93(2)  ?
  O2d  Li3  O1b  .  .  .  120(3)  ?
  O2d  Li3  O2b  .  .  .  133.9(9)  ?
  O1d  Li3  O1b  .  .  .  105.6(11)  ?
  O1d  Li3  O2b  .  .  .  112(2)  ?
  O1b  Li3  O2b  .  .  .  90(2)  ?
  O3b  C8b  C7b  .  .  .  124(3)  ?
  O3b  C8b  C9b  .  .  .  117(3)  ?
  C7b  C8b  C9b  .  .  .  120(2)  ?
  H7f  C7f  C8f  .  .  .  120(2)  ?
  H7f  C7f  C6f  .  .  .  118(2)  ?
  C8f  C7f  C6f  .  .  .  121(3)  ?
  O1d  C3d  C4d  .  .  .  122(3)  ?
  O1d  C3d  C2d  .  .  .  119(3)  ?
  C4d  C3d  C2d  .  .  .  118(3)  ?
  C7f  C8f  O3f  .  .  .  127(3)  ?
  C7f  C8f  C9f  .  .  .  121(2)  ?
  O3f  C8f  C9f  .  .  .  113(2)  ?
  H6d  C6d  C7d  .  .  .  119(3)  ?
  H6d  C6d  C5d  .  .  .  125(3)  ?
  C7d  C6d  C5d  .  .  .  116(3)  ?
  H1dc  C1d  H1db  .  .  .  109(2)  ?
  H1dc  C1d  H1da  .  .  .  108(3)  ?
  H1dc  C1d  C2d  .  .  .  110(3)  ?
  H1db  C1d  H1da  .  .  .  107(3)  ?
  H1db  C1d  C2d  .  .  .  111(3)  ?
  H1da  C1d  C2d  .  .  .  112(2)  ?
  C9c  O2c  Li2  .  .  .  124(3)  ?
  C9c  O2c  Ti2  .  .  .  109(2)  ?
  Li2  O2c  Ti2  .  .  .  122.9(18)  ?
  C8b  O3b  Ti2  .  .  .  118(2)  ?
  C4f  C9f  O2f  .  .  .  128(3)  ?
  C4f  C9f  C8f  .  .  .  120(2)  ?
  O2f  C9f  C8f  .  .  .  112(2)  ?
  H6e  C6e  C7e  .  .  .  122(3)  ?
  H6e  C6e  C5e  .  .  .  110(2)  ?
  C7e  C6e  C5e  .  .  .  121(2)  ?
  C8a  O3a  Ti1  .  .  .  114(2)  ?
  H6f  C6f  C5f  .  .  .  127(2)  ?
  H6f  C6f  C7f  .  .  .  110(3)  ?
  C5f  C6f  C7f  .  .  .  116(2)  ?
  O1c  Li2  O2c  .  .  .  94(2)  ?
  O1c  Li2  O2e  .  .  .  118(2)  ?
  O1c  Li2  O1e  .  .  .  102(2)  ?
  O2c  Li2  O2e  .  .  .  135(2)  ?
  O2c  Li2  O1e  .  .  .  113(2)  ?
  O2e  Li2  O1e  .  .  .  92.8(16)  ?
  O1f  Li1  O2f  .  .  .  95.4(16)  ?
  O1f  Li1  O2a  .  .  .  119(2)  ?
  O1f  Li1  O1a  .  .  .  98.0(18)  ?
  O2f  Li1  O2a  .  .  .  137(2)  ?
  O2f  Li1  O1a  .  .  .  109(2)  ?
  O2a  Li1  O1a  .  .  .  91.7(18)  ?
  O1lc  Li4  O1ld  .  .  .  122.8(10)  ?
  O1lc  Li4  O1le  .  .  .  103(2)  ?
  O1lc  Li4  O1lf  .  .  .  103(2)  ?
  O1ld  Li4  O1le  .  .  .  114(3)  ?
  O1ld  Li4  O1lf  .  .  .  106(2)  ?
  O1le  Li4  O1lf  .  .  .  106.5(10)  ?
  C1lc  O1lc  Li4  .  .  .  165(3)  ?
  C1lc  N1lc  C2lc  .  .  .  121(3)  ?
  C1lc  N1lc  C3lc  .  .  .  127(2)  ?
  C2lc  N1lc  C3lc  .  .  .  111(2)  ?
  H1lc  C1lc  O1lc  .  .  .  115(3)  ?
  H1lc  C1lc  N1lc  .  .  .  115(3)  ?
  O1lc  C1lc  N1lc  .  .  .  130(2)  ?
  H2lcb  C2lc  H2lcc  .  .  .  109(4)  ?
  H2lcb  C2lc  H2lca  .  .  .  109.6(17)  ?
  H2lcb  C2lc  N1lc  .  .  .  109(3)  ?
  H2lcc  C2lc  H2lca  .  .  .  109(4)  ?
  H2lcc  C2lc  N1lc  .  .  .  109.4(13)  ?
  H2lca  C2lc  N1lc  .  .  .  109(3)  ?
  H3lcb  C3lc  H3lcc  .  .  .  110(2)  ?
  H3lcb  C3lc  H3lca  .  .  .  109(4)  ?
  H3lcb  C3lc  N1lc  .  .  .  109(3)  ?
  H3lcc  C3lc  H3lca  .  .  .  109(3)  ?
  H3lcc  C3lc  N1lc  .  .  .  109(3)  ?
  H3lca  C3lc  N1lc  .  .  .  109(2)  ?
  C1ld  O1ld  Li4  .  .  .  166(3)  ?
  C1ld  N1ld  C3ld  .  .  .  118(2)  ?
  C1ld  N1ld  C2ld  .  .  .  121(3)  ?
  C3ld  N1ld  C2ld  .  .  .  119(3)  ?
  H1ld  C1ld  O1ld  .  .  .  117(3)  ?
  H1ld  C1ld  N1ld  .  .  .  117(3)  ?
  O1ld  C1ld  N1ld  .  .  .  126(3)  ?
  H2ldc  C2ld  H2ldb  .  .  .  109(4)  ?
  H2ldc  C2ld  H2lda  .  .  .  109(4)  ?
  H2ldc  C2ld  N1ld  .  .  .  109.5(15)  ?
  H2ldb  C2ld  H2lda  .  .  .  109.4(17)  ?
  H2ldb  C2ld  N1ld  .  .  .  109(3)  ?
  H2lda  C2ld  N1ld  .  .  .  109(3)  ?
  H3ldb  C3ld  H3lda  .  .  .  109(4)  ?
  H3ldb  C3ld  H3ldc  .  .  .  109(2)  ?
  H3ldb  C3ld  N1ld  .  .  .  110(3)  ?
  H3lda  C3ld  H3ldc  .  .  .  109(3)  ?
  H3lda  C3ld  N1ld  .  .  .  109(2)  ?
  H3ldc  C3ld  N1ld  .  .  .  109(3)  ?
  C1le  O1le  Li4  .  .  .  127(3)  ?
  C1le  N1le  C3le  .  .  .  136(2)  ?
  C1le  N1le  C2le  .  .  .  118(2)  ?
  C3le  N1le  C2le  .  .  .  106(2)  ?
  H1le  C1le  O1le  .  .  .  113(3)  ?
  H1le  C1le  N1le  .  .  .  113(3)  ?
  O1le  C1le  N1le  .  .  .  135(3)  ?
  H2lec  C2le  H2leb  .  .  .  109.4(19)  ?
  H2lec  C2le  H2lea  .  .  .  109(4)  ?
  H2lec  C2le  N1le  .  .  .  109(3)  ?
  H2leb  C2le  H2lea  .  .  .  109(4)  ?
  H2leb  C2le  N1le  .  .  .  109(3)  ?
  H2lea  C2le  N1le  .  .  .  109.5(17)  ?
  H3lea  C3le  H3lec  .  .  .  109(2)  ?
  H3lea  C3le  H3leb  .  .  .  110(4)  ?
  H3lea  C3le  N1le  .  .  .  109(3)  ?
  H3lec  C3le  H3leb  .  .  .  109(4)  ?
  H3lec  C3le  N1le  .  .  .  109(3)  ?
  H3leb  C3le  N1le  .  .  .  109.4(15)  ?
  C1lf  O1lf  Li4  .  .  .  125(2)  ?
  C1lf  N1lf  C3lf  .  .  .  121(2)  ?
  C1lf  N1lf  C2lf  .  .  .  108(2)  ?
  C3lf  N1lf  C2lf  .  .  .  131(3)  ?
  H1lf  C1lf  O1lf  .  .  .  122(3)  ?
  H1lf  C1lf  N1lf  .  .  .  122(2)  ?
  O1lf  C1lf  N1lf  .  .  .  117(2)  ?
  H2lfa  C2lf  H2lfc  .  .  .  110(2)  ?
  H2lfa  C2lf  H2lfb  .  .  .  110(3)  ?
  H2lfa  C2lf  N1lf  .  .  .  109(3)  ?
  H2lfc  C2lf  H2lfb  .  .  .  109(4)  ?
  H2lfc  C2lf  N1lf  .  .  .  109(3)  ?
  H2lfb  C2lf  N1lf  .  .  .  109.4(17)  ?
  H3lfa  C3lf  H3lfb  .  .  .  109(4)  ?
  H3lfa  C3lf  H3lfc  .  .  .  109(4)  ?
  H3lfa  C3lf  N1lf  .  .  .  109.5(17)  ?
  H3lfb  C3lf  H3lfc  .  .  .  109.5(18)  ?
  H3lfb  C3lf  N1lf  .  .  .  109(3)  ?
  H3lfc  C3lf  N1lf  .  .  .  109(3)  ?
  C3la  N1la  C1la  .  .  .  124(2)  ?
  C3la  N1la  C2la  .  .  .  118(2)  ?
  C1la  N1la  C2la  .  .  .  118(3)  ?
  H1la  C1la  O1la  .  .  .  117(3)  ?
  H1la  C1la  N1la  .  .  .  117(3)  ?
  O1la  C1la  N1la  .  .  .  126(3)  ?
  H2lab  C2la  H2lac  .  .  .  110(2)  ?
  H2lab  C2la  H2laa  .  .  .  109(4)  ?
  H2lab  C2la  N1la  .  .  .  109(3)  ?
  H2lac  C2la  H2laa  .  .  .  109(4)  ?
  H2lac  C2la  N1la  .  .  .  109(3)  ?
  H2laa  C2la  N1la  .  .  .  109.5(18)  ?
  H3laa  C3la  H3lac  .  .  .  110(4)  ?
  H3laa  C3la  H3lab  .  .  .  109(4)  ?
  H3laa  C3la  N1la  .  .  .  109(3)  ?
  H3lac  C3la  H3lab  .  .  .  109(3)  ?
  H3lac  C3la  N1la  .  .  .  109(4)  ?
  H3lab  C3la  N1la  .  .  .  109(4)  ?
  C1lb  N1lb  C3lb  .  .  .  120(3)  ?
  C1lb  N1lb  C2lb  .  .  .  124(2)  ?
  C3lb  N1lb  C2lb  .  .  .  115(2)  ?
  H1lb  C1lb  N1lb  .  .  .  119(3)  ?
  H1lb  C1lb  O1lb  .  .  .  119(3)  ?
  N1lb  C1lb  O1lb  .  .  .  122(3)  ?
  H2lba  C2lb  H2lbc  .  .  .  110(4)  ?
  H2lba  C2lb  H2lbb  .  .  .  110(4)  ?
  H2lba  C2lb  N1lb  .  .  .  109(3)  ?
  H2lbc  C2lb  H2lbb  .  .  .  109(3)  ?
  H2lbc  C2lb  N1lb  .  .  .  109(3)  ?
  H2lbb  C2lb  N1lb  .  .  .  109(3)  ?
  H3lbb  C3lb  H3lba  .  .  .  109(4)  ?
  H3lbb  C3lb  H3lbc  .  .  .  109(2)  ?
  H3lbb  C3lb  N1lb  .  .  .  109(3)  ?
  H3lba  C3lb  H3lbc  .  .  .  109(4)  ?
  H3lba  C3lb  N1lb  .  .  .  109.4(17)  ?
  H3lbc  C3lb  N1lb  .  .  .  109(3)  ?
 
loop_
_geom_torsion_atom_site_label_1
_geom_torsion_atom_site_label_2
_geom_torsion_atom_site_label_3
_geom_torsion_atom_site_label_4
_geom_torsion_site_symmetry_1
_geom_torsion_site_symmetry_2
_geom_torsion_site_symmetry_3
_geom_torsion_site_symmetry_4
_geom_torsion
_geom_torsion_publ_flag              #<< enter yes for value to be published
  O2e  Ti1  O2a  C9a  .  .  .  .  -163.5(17)  ?
  O2e  Ti1  O2a  Li1  .  .  .  .  -2(2)  ?
  O2d  Ti1  O2a  C9a  .  .  .  .  109.0(19)  ?
  O2d  Ti1  O2a  Li1  .  .  .  .  -89.4(17)  ?
  O3d  Ti1  O2a  C9a  .  .  .  .  74(9)  ?
  O3d  Ti1  O2a  Li1  .  .  .  .  -125(7)  ?
  O3e  Ti1  O2a  C9a  .  .  .  .  -84.9(18)  ?
  O3e  Ti1  O2a  Li1  .  .  .  .  77(2)  ?
  O3a  Ti1  O2a  C9a  .  .  .  .  7.0(18)  ?
  O3a  Ti1  O2a  Li1  .  .  .  .  168.6(18)  ?
  O2a  Ti1  O2e  C9e  .  .  .  .  109(2)  ?
  O2a  Ti1  O2e  Li2  .  .  .  .  -90(2)  ?
  O2d  Ti1  O2e  C9e  .  .  .  .  -160(3)  ?
  O2d  Ti1  O2e  Li2  .  .  .  .  0(2)  ?
  O3d  Ti1  O2e  C9e  .  .  .  .  -84(3)  ?
  O3d  Ti1  O2e  Li2  .  .  .  .  76(2)  ?
  O3e  Ti1  O2e  C9e  .  .  .  .  5(3)  ?
  O3e  Ti1  O2e  Li2  .  .  .  .  166(2)  ?
  O3a  Ti1  O2e  C9e  .  .  .  .  72(7)  ?
  O3a  Ti1  O2e  Li2  .  .  .  .  -128(6)  ?
  O2a  Ti1  O2d  C9d  .  .  .  .  -172(2)  ?
  O2a  Ti1  O2d  Li3  .  .  .  .  -3(2)  ?
  O2e  Ti1  O2d  C9d  .  .  .  .  100(2)  ?
  O2e  Ti1  O2d  Li3  .  .  .  .  -91(2)  ?
  O3d  Ti1  O2d  C9d  .  .  .  .  -2(2)  ?
  O3d  Ti1  O2d  Li3  .  .  .  .  167.3(18)  ?
  O3e  Ti1  O2d  C9d  .  .  .  .  53(6)  ?
  O3e  Ti1  O2d  Li3  .  .  .  .  -138(5)  ?
  O3a  Ti1  O2d  C9d  .  .  .  .  -92(2)  ?
  O3a  Ti1  O2d  Li3  .  .  .  .  77(2)  ?
  O2a  Ti1  O3d  C8d  .  .  .  .  36(9)  ?
  O2e  Ti1  O3d  C8d  .  .  .  .  -85(2)  ?
  O2d  Ti1  O3d  C8d  .  .  .  .  0(2)  ?
  O3e  Ti1  O3d  C8d  .  .  .  .  -165(2)  ?
  O3a  Ti1  O3d  C8d  .  .  .  .  101(2)  ?
  O2a  Ti1  O3e  C8e  .  .  .  .  -93(3)  ?
  O2e  Ti1  O3e  C8e  .  .  .  .  -7(3)  ?
  O2d  Ti1  O3e  C8e  .  .  .  .  40(7)  ?
  O3d  Ti1  O3e  C8e  .  .  .  .  93(3)  ?
  O3a  Ti1  O3e  C8e  .  .  .  .  -173(3)  ?
  O2a  Ti1  O3a  C8a  .  .  .  .  -9(2)  ?
  O2e  Ti1  O3a  C8a  .  .  .  .  29(7)  ?
  O2d  Ti1  O3a  C8a  .  .  .  .  -97(2)  ?
  O3d  Ti1  O3a  C8a  .  .  .  .  -174.6(19)  ?
  O3e  Ti1  O3a  C8a  .  .  .  .  93(2)  ?
  O2b  Ti2  O3c  C8c  .  .  .  .  -92(2)  ?
  O3f  Ti2  O3c  C8c  .  .  .  .  92(2)  ?
  O2f  Ti2  O3c  C8c  .  .  .  .  22(6)  ?
  O2c  Ti2  O3c  C8c  .  .  .  .  -9(2)  ?
  O3b  Ti2  O3c  C8c  .  .  .  .  -174(2)  ?
  O3c  Ti2  O2b  C9b  .  .  .  .  -91(2)  ?
  O3c  Ti2  O2b  Li3  .  .  .  .  74(2)  ?
  O3f  Ti2  O2b  C9b  .  .  .  .  75(7)  ?
  O3f  Ti2  O2b  Li3  .  .  .  .  -120(7)  ?
  O2f  Ti2  O2b  C9b  .  .  .  .  107(2)  ?
  O2f  Ti2  O2b  Li3  .  .  .  .  -88(2)  ?
  O2c  Ti2  O2b  C9b  .  .  .  .  -169(2)  ?
  O2c  Ti2  O2b  Li3  .  .  .  .  -3.9(19)  ?
  O3b  Ti2  O2b  C9b  .  .  .  .  4(2)  ?
  O3b  Ti2  O2b  Li3  .  .  .  .  168.7(18)  ?
  O3c  Ti2  O3f  C8f  .  .  .  .  -168(3)  ?
  O2b  Ti2  O3f  C8f  .  .  .  .  25(8)  ?
  O2f  Ti2  O3f  C8f  .  .  .  .  -7(3)  ?
  O2c  Ti2  O3f  C8f  .  .  .  .  -89(3)  ?
  O3b  Ti2  O3f  C8f  .  .  .  .  95(3)  ?
  O3c  Ti2  O2f  C9f  .  .  .  .  80(6)  ?
  O3c  Ti2  O2f  Li1  .  .  .  .  -115(5)  ?
  O2b  Ti2  O2f  C9f  .  .  .  .  -164(3)  ?
  O2b  Ti2  O2f  Li1  .  .  .  .  1(3)  ?
  O3f  Ti2  O2f  C9f  .  .  .  .  7(3)  ?
  O3f  Ti2  O2f  Li1  .  .  .  .  173(2)  ?
  O2c  Ti2  O2f  C9f  .  .  .  .  110(3)  ?
  O2c  Ti2  O2f  Li1  .  .  .  .  -85(2)  ?
  O3b  Ti2  O2f  C9f  .  .  .  .  -84(3)  ?
  O3b  Ti2  O2f  Li1  .  .  .  .  82(3)  ?
  O3c  Ti2  O2c  C9c  .  .  .  .  11.3(15)  ?
  O3c  Ti2  O2c  Li2  .  .  .  .  169(2)  ?
  O2b  Ti2  O2c  C9c  .  .  .  .  114.6(15)  ?
  O2b  Ti2  O2c  Li2  .  .  .  .  -88(2)  ?
  O3f  Ti2  O2c  C9c  .  .  .  .  -80.0(17)  ?
  O3f  Ti2  O2c  Li2  .  .  .  .  78(3)  ?
  O2f  Ti2  O2c  C9c  .  .  .  .  -158.8(16)  ?
  O2f  Ti2  O2c  Li2  .  .  .  .  -1(2)  ?
  O3b  Ti2  O2c  C9c  .  .  .  .  85(9)  ?
  O3b  Ti2  O2c  Li2  .  .  .  .  -117(8)  ?
  O3c  Ti2  O3b  C8b  .  .  .  .  101(2)  ?
  O2b  Ti2  O3b  C8b  .  .  .  .  0(2)  ?
  O3f  Ti2  O3b  C8b  .  .  .  .  -165(2)  ?
  O2f  Ti2  O3b  C8b  .  .  .  .  -85(2)  ?
  O2c  Ti2  O3b  C8b  .  .  .  .  29(*)  ?
  Ti1  O2a  C9a  C8a  .  .  .  .  -3(2)  ?
  Ti1  O2a  C9a  C4a  .  .  .  .  168(2)  ?
  Li1  O2a  C9a  C8a  .  .  .  .  -163.0(19)  ?
  Li1  O2a  C9a  C4a  .  .  .  .  8(4)  ?
  Ti1  O2a  Li1  O1a  .  .  .  .  -171.7(17)  ?
  Ti1  O2a  Li1  O1f  .  .  .  .  -72(3)  ?
  Ti1  O2a  Li1  O2f  .  .  .  .  67(3)  ?
  C9a  O2a  Li1  O1a  .  .  .  .  -11(3)  ?
  C9a  O2a  Li1  O1f  .  .  .  .  89(3)  ?
  C9a  O2a  Li1  O2f  .  .  .  .  -132(3)  ?
  Ti2  O3c  C8c  C9c  .  .  .  .  4(3)  ?
  Ti2  O3c  C8c  C7c  .  .  .  .  -171(2)  ?
  Li1  O1a  C3a  C2a  .  .  .  .  179(2)  ?
  Li1  O1a  C3a  C4a  .  .  .  .  -7(4)  ?
  C3a  O1a  Li1  O2a  .  .  .  .  11(3)  ?
  C3a  O1a  Li1  O1f  .  .  .  .  -108(3)  ?
  C3a  O1a  Li1  O2f  .  .  .  .  153(2)  ?
  Li3  O1b  C3b  C4b  .  .  .  .  9(5)  ?
  Li3  O1b  C3b  C2b  .  .  .  .  -179(3)  ?
  C3b  O1b  Li3  O2b  .  .  .  .  -3(4)  ?
  C3b  O1b  Li3  O2d  .  .  .  .  140(3)  ?
  C3b  O1b  Li3  O1d  .  .  .  .  -116(3)  ?
  Ti1  O2e  C9e  C8e  .  .  .  .  -3(4)  ?
  Ti1  O2e  C9e  C4e  .  .  .  .  176(3)  ?
  Li2  O2e  C9e  C8e  .  .  .  .  -162(3)  ?
  Li2  O2e  C9e  C4e  .  .  .  .  17(5)  ?
  Ti1  O2e  Li2  O1c  .  .  .  .  -73(2)  ?
  Ti1  O2e  Li2  O1e  .  .  .  .  -177(2)  ?
  Ti1  O2e  Li2  O2c  .  .  .  .  56(4)  ?
  C9e  O2e  Li2  O1c  .  .  .  .  84(3)  ?
  C9e  O2e  Li2  O1e  .  .  .  .  -21(3)  ?
  C9e  O2e  Li2  O2c  .  .  .  .  -147(3)  ?
  C9d  C8d  O3d  Ti1  .  .  .  .  2(3)  ?
  C7d  C8d  O3d  Ti1  .  .  .  .  179(2)  ?
  O3d  C8d  C9d  O2d  .  .  .  .  -4(3)  ?
  O3d  C8d  C9d  C4d  .  .  .  .  -175(2)  ?
  C7d  C8d  C9d  O2d  .  .  .  .  179(2)  ?
  C7d  C8d  C9d  C4d  .  .  .  .  8(4)  ?
  O3d  C8d  C7d  C6d  .  .  .  .  180(3)  ?
  O3d  C8d  C7d  H7d  .  .  .  .  -4(4)  ?
  C9d  C8d  C7d  C6d  .  .  .  .  -4(4)  ?
  C9d  C8d  C7d  H7d  .  .  .  .  172(2)  ?
  C7e  C8e  C9e  O2e  .  .  .  .  -179(3)  ?
  C7e  C8e  C9e  C4e  .  .  .  .  2(5)  ?
  O3e  C8e  C9e  O2e  .  .  .  .  -3(5)  ?
  O3e  C8e  C9e  C4e  .  .  .  .  178(3)  ?
  C9e  C8e  C7e  C6e  .  .  .  .  8(5)  ?
  C9e  C8e  C7e  H7e  .  .  .  .  165(3)  ?
  O3e  C8e  C7e  C6e  .  .  .  .  -168(3)  ?
  O3e  C8e  C7e  H7e  .  .  .  .  -11(6)  ?
  C9e  C8e  O3e  Ti1  .  .  .  .  8(4)  ?
  C7e  C8e  O3e  Ti1  .  .  .  .  -175(3)  ?
  Ti2  O2b  C9b  C4b  .  .  .  .  -178(2)  ?
  Ti2  O2b  C9b  C8b  .  .  .  .  -6(3)  ?
  Li3  O2b  C9b  C4b  .  .  .  .  17(4)  ?
  Li3  O2b  C9b  C8b  .  .  .  .  -171(2)  ?
  Ti2  O2b  Li3  O1b  .  .  .  .  -172.7(16)  ?
  Ti2  O2b  Li3  O2d  .  .  .  .  53(4)  ?
  Ti2  O2b  Li3  O1d  .  .  .  .  -66(2)  ?
  C9b  O2b  Li3  O1b  .  .  .  .  -9(3)  ?
  C9b  O2b  Li3  O2d  .  .  .  .  -144(3)  ?
  C9b  O2b  Li3  O1d  .  .  .  .  98(3)  ?
  Ti1  O2d  C9d  C8d  .  .  .  .  4(3)  ?
  Ti1  O2d  C9d  C4d  .  .  .  .  174(2)  ?
  Li3  O2d  C9d  C8d  .  .  .  .  -164(2)  ?
  Li3  O2d  C9d  C4d  .  .  .  .  6(4)  ?
  Ti1  O2d  Li3  O1b  .  .  .  .  -66(2)  ?
  Ti1  O2d  Li3  O2b  .  .  .  .  59(4)  ?
  Ti1  O2d  Li3  O1d  .  .  .  .  -176.2(15)  ?
  C9d  O2d  Li3  O1b  .  .  .  .  102(3)  ?
  C9d  O2d  Li3  O2b  .  .  .  .  -133(3)  ?
  C9d  O2d  Li3  O1d  .  .  .  .  -8(3)  ?
  Li1  O1f  C3f  C4f  .  .  .  .  -2(5)  ?
  Li1  O1f  C3f  C2f  .  .  .  .  175(3)  ?
  C3f  O1f  Li1  O2a  .  .  .  .  161(3)  ?
  C3f  O1f  Li1  O1a  .  .  .  .  -103(4)  ?
  C3f  O1f  Li1  O2f  .  .  .  .  7(4)  ?
  Li2  O1c  C3c  C4c  .  .  .  .  0(4)  ?
  Li2  O1c  C3c  C2c  .  .  .  .  175(2)  ?
  C3c  O1c  Li2  O2e  .  .  .  .  154(2)  ?
  C3c  O1c  Li2  O1e  .  .  .  .  -106(3)  ?
  C3c  O1c  Li2  O2c  .  .  .  .  8(3)  ?
  O1b  C3b  C4b  C9b  .  .  .  .  -4(4)  ?
  O1b  C3b  C4b  C5b  .  .  .  .  171(3)  ?
  C2b  C3b  C4b  C9b  .  .  .  .  -176(3)  ?
  C2b  C3b  C4b  C5b  .  .  .  .  0(3)  ?
  O1b  C3b  C2b  C1b  .  .  .  .  3(4)  ?
  O1b  C3b  C2b  H2ba  .  .  .  .  -121(3)  ?
  O1b  C3b  C2b  H2bb  .  .  .  .  127(3)  ?
  C4b  C3b  C2b  C1b  .  .  .  .  175(2)  ?
  C4b  C3b  C2b  H2ba  .  .  .  .  51(3)  ?
  C4b  C3b  C2b  H2bb  .  .  .  .  -61(3)  ?
  O2e  C9e  C4e  C3e  .  .  .  .  -1(5)  ?
  O2e  C9e  C4e  C5e  .  .  .  .  -178(3)  ?
  C8e  C9e  C4e  C3e  .  .  .  .  177(3)  ?
  C8e  C9e  C4e  C5e  .  .  .  .  0(5)  ?
  C5b  C6b  C7b  C8b  .  .  .  .  -2(4)  ?
  C5b  C6b  C7b  H7b  .  .  .  .  170(3)  ?
  H6b  C6b  C7b  C8b  .  .  .  .  172(3)  ?
  H6b  C6b  C7b  H7b  .  .  .  .  -17(4)  ?
  C7b  C6b  C5b  C4b  .  .  .  .  -1(4)  ?
  C7b  C6b  C5b  H5b  .  .  .  .  -178(3)  ?
  H6b  C6b  C5b  C4b  .  .  .  .  -175(2)  ?
  H6b  C6b  C5b  H5b  .  .  .  .  8(4)  ?
  Li2  O1e  C3e  C4e  .  .  .  .  -6(5)  ?
  Li2  O1e  C3e  C2e  .  .  .  .  173(3)  ?
  C3e  O1e  Li2  O2e  .  .  .  .  15(4)  ?
  C3e  O1e  Li2  O1c  .  .  .  .  -103(4)  ?
  C3e  O1e  Li2  O2c  .  .  .  .  157(3)  ?
  C8d  C9d  C4d  C5d  .  .  .  .  -7(4)  ?
  C8d  C9d  C4d  C3d  .  .  .  .  172(3)  ?
  O2d  C9d  C4d  C5d  .  .  .  .  -177(3)  ?
  O2d  C9d  C4d  C3d  .  .  .  .  2(4)  ?
  Ti2  O3f  C8f  C7f  .  .  .  .  -170(3)  ?
  Ti2  O3f  C8f  C9f  .  .  .  .  6(4)  ?
  C5f  C4f  C3f  O1f  .  .  .  .  178(3)  ?
  C5f  C4f  C3f  C2f  .  .  .  .  0(4)  ?
  C9f  C4f  C3f  O1f  .  .  .  .  -3(5)  ?
  C9f  C4f  C3f  C2f  .  .  .  .  179(3)  ?
  C3f  C4f  C5f  C6f  .  .  .  .  -167(3)  ?
  C3f  C4f  C5f  H5f  .  .  .  .  -1(5)  ?
  C9f  C4f  C5f  C6f  .  .  .  .  15(5)  ?
  C9f  C4f  C5f  H5f  .  .  .  .  -180(3)  ?
  C3f  C4f  C9f  O2f  .  .  .  .  0(6)  ?
  C3f  C4f  C9f  C8f  .  .  .  .  180(3)  ?
  C5f  C4f  C9f  O2f  .  .  .  .  179(3)  ?
  C5f  C4f  C9f  C8f  .  .  .  .  -1(5)  ?
  C8e  C7e  C6e  C5e  .  .  .  .  -19(5)  ?
  C8e  C7e  C6e  H6e  .  .  .  .  -167(3)  ?
  H7e  C7e  C6e  C5e  .  .  .  .  -177(3)  ?
  H7e  C7e  C6e  H6e  .  .  .  .  35(6)  ?
  C3d  O1d  Li3  O1b  .  .  .  .  -117(3)  ?
  C3d  O1d  Li3  O2b  .  .  .  .  146(3)  ?
  C3d  O1d  Li3  O2d  .  .  .  .  6(3)  ?
  Li3  O1d  C3d  C4d  .  .  .  .  0(4)  ?
  Li3  O1d  C3d  C2d  .  .  .  .  -178(2)  ?
  C8c  C9c  C4c  C3c  .  .  .  .  -177(2)  ?
  C8c  C9c  C4c  C5c  .  .  .  .  4(3)  ?
  O2c  C9c  C4c  C3c  .  .  .  .  -5(3)  ?
  O2c  C9c  C4c  C5c  .  .  .  .  176(2)  ?
  C4c  C9c  C8c  O3c  .  .  .  .  180(2)  ?
  C4c  C9c  C8c  C7c  .  .  .  .  -5(3)  ?
  O2c  C9c  C8c  O3c  .  .  .  .  7(3)  ?
  O2c  C9c  C8c  C7c  .  .  .  .  -178(2)  ?
  C4c  C9c  O2c  Ti2  .  .  .  .  174.3(16)  ?
  C4c  C9c  O2c  Li2  .  .  .  .  17(3)  ?
  C8c  C9c  O2c  Ti2  .  .  .  .  -13(2)  ?
  C8c  C9c  O2c  Li2  .  .  .  .  -170.8(19)  ?
  C9c  C4c  C3c  O1c  .  .  .  .  -4(4)  ?
  C9c  C4c  C3c  C2c  .  .  .  .  -179(2)  ?
  C5c  C4c  C3c  O1c  .  .  .  .  175(2)  ?
  C5c  C4c  C3c  C2c  .  .  .  .  0(3)  ?
  C9c  C4c  C5c  C6c  .  .  .  .  0(3)  ?
  C9c  C4c  C5c  H5c  .  .  .  .  -173(2)  ?
  C3c  C4c  C5c  C6c  .  .  .  .  -179(2)  ?
  C3c  C4c  C5c  H5c  .  .  .  .  8(3)  ?
  Ti2  O2f  C9f  C4f  .  .  .  .  173(3)  ?
  Ti2  O2f  C9f  C8f  .  .  .  .  -6(4)  ?
  Li1  O2f  C9f  C4f  .  .  .  .  7(5)  ?
  Li1  O2f  C9f  C8f  .  .  .  .  -173(2)  ?
  Ti2  O2f  Li1  O2a  .  .  .  .  42(4)  ?
  Ti2  O2f  Li1  O1a  .  .  .  .  -74(2)  ?
  Ti2  O2f  Li1  O1f  .  .  .  .  -174(2)  ?
  C9f  O2f  Li1  O2a  .  .  .  .  -153(3)  ?
  C9f  O2f  Li1  O1a  .  .  .  .  92(3)  ?
  C9f  O2f  Li1  O1f  .  .  .  .  -9(3)  ?
  O1f  C3f  C2f  C1f  .  .  .  .  0(5)  ?
  O1f  C3f  C2f  H2fa  .  .  .  .  -111(4)  ?
  O1f  C3f  C2f  H2fb  .  .  .  .  123(4)  ?
  C4f  C3f  C2f  C1f  .  .  .  .  177(3)  ?
  C4f  C3f  C2f  H2fa  .  .  .  .  67(4)  ?
  C4f  C3f  C2f  H2fb  .  .  .  .  -60(4)  ?
  C7a  C8a  C9a  O2a  .  .  .  .  179(2)  ?
  C7a  C8a  C9a  C4a  .  .  .  .  7(3)  ?
  O3a  C8a  C9a  O2a  .  .  .  .  -6(3)  ?
  O3a  C8a  C9a  C4a  .  .  .  .  -177.8(18)  ?
  C9a  C8a  C7a  C6a  .  .  .  .  -4(3)  ?
  C9a  C8a  C7a  H7a  .  .  .  .  165(2)  ?
  O3a  C8a  C7a  C6a  .  .  .  .  -178(2)  ?
  O3a  C8a  C7a  H7a  .  .  .  .  -10(4)  ?
  C9a  C8a  O3a  Ti1  .  .  .  .  11(3)  ?
  C7a  C8a  O3a  Ti1  .  .  .  .  -173.5(19)  ?
  C6b  C7b  C8b  C9b  .  .  .  .  5(4)  ?
  C6b  C7b  C8b  O3b  .  .  .  .  179(2)  ?
  H7b  C7b  C8b  C9b  .  .  .  .  -165(3)  ?
  H7b  C7b  C8b  O3b  .  .  .  .  9(4)  ?
  O3c  C8c  C7c  C6c  .  .  .  .  177(2)  ?
  O3c  C8c  C7c  H7c  .  .  .  .  9(4)  ?
  C9c  C8c  C7c  C6c  .  .  .  .  3(3)  ?
  C9c  C8c  C7c  H7c  .  .  .  .  -165(2)  ?
  O2a  C9a  C4a  C3a  .  .  .  .  0(4)  ?
  O2a  C9a  C4a  C5a  .  .  .  .  -177(2)  ?
  C8a  C9a  C4a  C3a  .  .  .  .  170.8(19)  ?
  C8a  C9a  C4a  C5a  .  .  .  .  -6(3)  ?
  O1a  C3a  C2a  C1a  .  .  .  .  -5(3)  ?
  O1a  C3a  C2a  H2aa  .  .  .  .  -132(2)  ?
  O1a  C3a  C2a  H2ab  .  .  .  .  113(3)  ?
  C4a  C3a  C2a  C1a  .  .  .  .  -180(2)  ?
  C4a  C3a  C2a  H2aa  .  .  .  .  53(2)  ?
  C4a  C3a  C2a  H2ab  .  .  .  .  -62(4)  ?
  O1a  C3a  C4a  C9a  .  .  .  .  -1(4)  ?
  O1a  C3a  C4a  C5a  .  .  .  .  176(2)  ?
  C2a  C3a  C4a  C9a  .  .  .  .  173(2)  ?
  C2a  C3a  C4a  C5a  .  .  .  .  -9(3)  ?
  O1c  C3c  C2c  C1c  .  .  .  .  -2(3)  ?
  O1c  C3c  C2c  H2ca  .  .  .  .  -116(3)  ?
  O1c  C3c  C2c  H2cb  .  .  .  .  120(3)  ?
  C4c  C3c  C2c  C1c  .  .  .  .  173(2)  ?
  C4c  C3c  C2c  H2ca  .  .  .  .  59(3)  ?
  C4c  C3c  C2c  H2cb  .  .  .  .  -65(4)  ?
  C6d  C5d  C4d  C9d  .  .  .  .  2(4)  ?
  C6d  C5d  C4d  C3d  .  .  .  .  -177(3)  ?
  H5d  C5d  C4d  C9d  .  .  .  .  -169(2)  ?
  H5d  C5d  C4d  C3d  .  .  .  .  13(4)  ?
  C4d  C5d  C6d  C7d  .  .  .  .  2(4)  ?
  C4d  C5d  C6d  H6d  .  .  .  .  173(3)  ?
  H5d  C5d  C6d  C7d  .  .  .  .  172(2)  ?
  H5d  C5d  C6d  H6d  .  .  .  .  -17(5)  ?
  C4a  C5a  C6a  C7a  .  .  .  .  2(4)  ?
  C4a  C5a  C6a  H6a  .  .  .  .  173(2)  ?
  H5a  C5a  C6a  C7a  .  .  .  .  -170(2)  ?
  H5a  C5a  C6a  H6a  .  .  .  .  0(4)  ?
  C6a  C5a  C4a  C9a  .  .  .  .  2(3)  ?
  C6a  C5a  C4a  C3a  .  .  .  .  -175(2)  ?
  H5a  C5a  C4a  C9a  .  .  .  .  173(2)  ?
  H5a  C5a  C4a  C3a  .  .  .  .  -4(4)  ?
  C3b  C4b  C9b  O2b  .  .  .  .  -10(4)  ?
  C3b  C4b  C9b  C8b  .  .  .  .  178(2)  ?
  C5b  C4b  C9b  O2b  .  .  .  .  175(3)  ?
  C5b  C4b  C9b  C8b  .  .  .  .  3(4)  ?
  C3b  C4b  C5b  C6b  .  .  .  .  -175(2)  ?
  C3b  C4b  C5b  H5b  .  .  .  .  2(4)  ?
  C9b  C4b  C5b  C6b  .  .  .  .  0(4)  ?
  C9b  C4b  C5b  H5b  .  .  .  .  177(3)  ?
  O1e  C3e  C4e  C9e  .  .  .  .  -4(5)  ?
  O1e  C3e  C4e  C5e  .  .  .  .  173(3)  ?
  C2e  C3e  C4e  C9e  .  .  .  .  177(3)  ?
  C2e  C3e  C4e  C5e  .  .  .  .  -6(5)  ?
  O1e  C3e  C2e  C1e  .  .  .  .  1(4)  ?
  O1e  C3e  C2e  H2ea  .  .  .  .  -125(3)  ?
  O1e  C3e  C2e  H2eb  .  .  .  .  121(3)  ?
  C4e  C3e  C2e  C1e  .  .  .  .  -180(3)  ?
  C4e  C3e  C2e  H2ea  .  .  .  .  54(4)  ?
  C4e  C3e  C2e  H2eb  .  .  .  .  -60(4)  ?
  C9d  C4d  C3d  O1d  .  .  .  .  -5(4)  ?
  C9d  C4d  C3d  C2d  .  .  .  .  173(2)  ?
  C5d  C4d  C3d  O1d  .  .  .  .  174(3)  ?
  C5d  C4d  C3d  C2d  .  .  .  .  -9(4)  ?
  C8c  C7c  C6c  C5c  .  .  .  .  0(3)  ?
  C8c  C7c  C6c  H6c  .  .  .  .  172(2)  ?
  H7c  C7c  C6c  C5c  .  .  .  .  168(2)  ?
  H7c  C7c  C6c  H6c  .  .  .  .  -20(4)  ?
  C3b  C2b  C1b  H1ba  .  .  .  .  60(4)  ?
  C3b  C2b  C1b  H1bb  .  .  .  .  -71(3)  ?
  C3b  C2b  C1b  H1bc  .  .  .  .  172(2)  ?
  H2ba  C2b  C1b  H1ba  .  .  .  .  -178(3)  ?
  H2ba  C2b  C1b  H1bb  .  .  .  .  51(4)  ?
  H2ba  C2b  C1b  H1bc  .  .  .  .  -66(4)  ?
  H2bb  C2b  C1b  H1ba  .  .  .  .  -61(4)  ?
  H2bb  C2b  C1b  H1bb  .  .  .  .  168(3)  ?
  H2bb  C2b  C1b  H1bc  .  .  .  .  51(3)  ?
  H1ea  C1e  C2e  C3e  .  .  .  .  -140(3)  ?
  H1ea  C1e  C2e  H2ea  .  .  .  .  -16(3)  ?
  H1ea  C1e  C2e  H2eb  .  .  .  .  100(3)  ?
  H1eb  C1e  C2e  C3e  .  .  .  .  89(3)  ?
  H1eb  C1e  C2e  H2ea  .  .  .  .  -147(2)  ?
  H1eb  C1e  C2e  H2eb  .  .  .  .  -31(3)  ?
  H1ec  C1e  C2e  C3e  .  .  .  .  -33(4)  ?
  H1ec  C1e  C2e  H2ea  .  .  .  .  91(2)  ?
  H1ec  C1e  C2e  H2eb  .  .  .  .  -152(2)  ?
  C3a  C2a  C1a  H1aa  .  .  .  .  -12(3)  ?
  C3a  C2a  C1a  H1ab  .  .  .  .  -126(2)  ?
  C3a  C2a  C1a  H1ac  .  .  .  .  112(3)  ?
  H2aa  C2a  C1a  H1aa  .  .  .  .  114(3)  ?
  H2aa  C2a  C1a  H1ab  .  .  .  .  0(3)  ?
  H2aa  C2a  C1a  H1ac  .  .  .  .  -122(3)  ?
  H2ab  C2a  C1a  H1aa  .  .  .  .  -130(3)  ?
  H2ab  C2a  C1a  H1ab  .  .  .  .  116(3)  ?
  H2ab  C2a  C1a  H1ac  .  .  .  .  -5(5)  ?
  C4f  C5f  C6f  C7f  .  .  .  .  -22(5)  ?
  C4f  C5f  C6f  H6f  .  .  .  .  -169(3)  ?
  H5f  C5f  C6f  C7f  .  .  .  .  173(3)  ?
  H5f  C5f  C6f  H6f  .  .  .  .  26(6)  ?
  C4c  C5c  C6c  C7c  .  .  .  .  -2(4)  ?
  C4c  C5c  C6c  H6c  .  .  .  .  -174(2)  ?
  H5c  C5c  C6c  C7c  .  .  .  .  171(2)  ?
  H5c  C5c  C6c  H6c  .  .  .  .  -2(4)  ?
  C9e  C4e  C5e  C6e  .  .  .  .  -11(5)  ?
  C9e  C4e  C5e  H5e  .  .  .  .  -175(3)  ?
  C3e  C4e  C5e  C6e  .  .  .  .  172(3)  ?
  C3e  C4e  C5e  H5e  .  .  .  .  8(6)  ?
  O2b  C9b  C8b  C7b  .  .  .  .  -179(3)  ?
  O2b  C9b  C8b  O3b  .  .  .  .  6(3)  ?
  C4b  C9b  C8b  C7b  .  .  .  .  -6(4)  ?
  C4b  C9b  C8b  O3b  .  .  .  .  179(2)  ?
  C8a  C7a  C6a  C5a  .  .  .  .  0(4)  ?
  C8a  C7a  C6a  H6a  .  .  .  .  -172(2)  ?
  H7a  C7a  C6a  C5a  .  .  .  .  -170(3)  ?
  H7a  C7a  C6a  H6a  .  .  .  .  19(4)  ?
  C4e  C5e  C6e  C7e  .  .  .  .  21(5)  ?
  C4e  C5e  C6e  H6e  .  .  .  .  172(3)  ?
  H5e  C5e  C6e  C7e  .  .  .  .  -174(3)  ?
  H5e  C5e  C6e  H6e  .  .  .  .  -23(5)  ?
  C3f  C2f  C1f  H1fa  .  .  .  .  -174(3)  ?
  C3f  C2f  C1f  H1fb  .  .  .  .  83(2)  ?
  C3f  C2f  C1f  H1fc  .  .  .  .  -34(5)  ?
  H2fa  C2f  C1f  H1fa  .  .  .  .  -60(3)  ?
  H2fa  C2f  C1f  H1fb  .  .  .  .  -162.4(14)  ?
  H2fa  C2f  C1f  H1fc  .  .  .  .  81(3)  ?
  H2fb  C2f  C1f  H1fa  .  .  .  .  63(4)  ?
  H2fb  C2f  C1f  H1fb  .  .  .  .  -40(2)  ?
  H2fb  C2f  C1f  H1fc  .  .  .  .  -157(3)  ?
  C3c  C2c  C1c  H1ca  .  .  .  .  -10(4)  ?
  C3c  C2c  C1c  H1cb  .  .  .  .  -144(3)  ?
  C3c  C2c  C1c  H1cc  .  .  .  .  104(3)  ?
  H2ca  C2c  C1c  H1ca  .  .  .  .  106(3)  ?
  H2ca  C2c  C1c  H1cb  .  .  .  .  -28(3)  ?
  H2ca  C2c  C1c  H1cc  .  .  .  .  -140(3)  ?
  H2cb  C2c  C1c  H1ca  .  .  .  .  -131(3)  ?
  H2cb  C2c  C1c  H1cb  .  .  .  .  95(4)  ?
  H2cb  C2c  C1c  H1cc  .  .  .  .  -17(4)  ?
  C8d  C7d  C6d  C5d  .  .  .  .  0(4)  ?
  C8d  C7d  C6d  H6d  .  .  .  .  -172(3)  ?
  H7d  C7d  C6d  C5d  .  .  .  .  -177(3)  ?
  H7d  C7d  C6d  H6d  .  .  .  .  12(4)  ?
  C1d  C2d  C3d  O1d  .  .  .  .  -5(3)  ?
  C1d  C2d  C3d  C4d  .  .  .  .  178(2)  ?
  H2da  C2d  C3d  O1d  .  .  .  .  111(3)  ?
  H2da  C2d  C3d  C4d  .  .  .  .  -66(4)  ?
  H2db  C2d  C3d  O1d  .  .  .  .  -123(3)  ?
  H2db  C2d  C3d  C4d  .  .  .  .  60(3)  ?
  C3d  C2d  C1d  H1da  .  .  .  .  40(4)  ?
  C3d  C2d  C1d  H1db  .  .  .  .  -79(3)  ?
  C3d  C2d  C1d  H1dc  .  .  .  .  160(2)  ?
  H2da  C2d  C1d  H1da  .  .  .  .  -78(4)  ?
  H2da  C2d  C1d  H1db  .  .  .  .  163(3)  ?
  H2da  C2d  C1d  H1dc  .  .  .  .  42(3)  ?
  H2db  C2d  C1d  H1da  .  .  .  .  159(3)  ?
  H2db  C2d  C1d  H1db  .  .  .  .  40(4)  ?
  H2db  C2d  C1d  H1dc  .  .  .  .  -81(4)  ?
  C7b  C8b  O3b  Ti2  .  .  .  .  -178(2)  ?
  C9b  C8b  O3b  Ti2  .  .  .  .  -3(3)  ?
  C6f  C7f  C8f  O3f  .  .  .  .  171(3)  ?
  C6f  C7f  C8f  C9f  .  .  .  .  -5(5)  ?
  H7f  C7f  C8f  O3f  .  .  .  .  5(6)  ?
  H7f  C7f  C8f  C9f  .  .  .  .  -171(3)  ?
  C8f  C7f  C6f  C5f  .  .  .  .  17(5)  ?
  C8f  C7f  C6f  H6f  .  .  .  .  169(3)  ?
  H7f  C7f  C6f  C5f  .  .  .  .  -177(3)  ?
  H7f  C7f  C6f  H6f  .  .  .  .  -24(4)  ?
  O3f  C8f  C9f  C4f  .  .  .  .  -179(3)  ?
  O3f  C8f  C9f  O2f  .  .  .  .  0(4)  ?
  C7f  C8f  C9f  C4f  .  .  .  .  -3(5)  ?
  C7f  C8f  C9f  O2f  .  .  .  .  177(3)  ?
  Ti2  O2c  Li2  O2e  .  .  .  .  53(3)  ?
  Ti2  O2c  Li2  O1c  .  .  .  .  -170.6(17)  ?
  Ti2  O2c  Li2  O1e  .  .  .  .  -66(3)  ?
  C9c  O2c  Li2  O2e  .  .  .  .  -152(2)  ?
  C9c  O2c  Li2  O1c  .  .  .  .  -16(3)  ?
  C9c  O2c  Li2  O1e  .  .  .  .  88(3)  ?
  O1ld  Li4  O1lc  C1lc  .  .  .  .  -113(7)  ?
  O1le  Li4  O1lc  C1lc  .  .  .  .  18(8)  ?
  O1lf  Li4  O1lc  C1lc  .  .  .  .  129(7)  ?
  O1lc  Li4  O1ld  C1ld  .  .  .  .  -104(7)  ?
  O1le  Li4  O1ld  C1ld  .  .  .  .  130(7)  ?
  O1lf  Li4  O1ld  C1ld  .  .  .  .  13(8)  ?
  O1lc  Li4  O1le  C1le  .  .  .  .  173(2)  ?
  O1ld  Li4  O1le  C1le  .  .  .  .  -51(3)  ?
  O1lf  Li4  O1le  C1le  .  .  .  .  65(4)  ?
  O1lc  Li4  O1lf  C1lf  .  .  .  .  -78(3)  ?
  O1ld  Li4  O1lf  C1lf  .  .  .  .  152(3)  ?
  O1le  Li4  O1lf  C1lf  .  .  .  .  30(4)  ?
  Li4  O1lc  C1lc  N1lc  .  .  .  .  -6(9)  ?
  Li4  O1lc  C1lc  H1lc  .  .  .  .  174(6)  ?
  C2lc  N1lc  C1lc  O1lc  .  .  .  .  -3(4)  ?
  C2lc  N1lc  C1lc  H1lc  .  .  .  .  177(2)  ?
  C3lc  N1lc  C1lc  O1lc  .  .  .  .  -179(2)  ?
  C3lc  N1lc  C1lc  H1lc  .  .  .  .  1(3)  ?
  C1lc  N1lc  C2lc  H2lca  .  .  .  .  -15(4)  ?
  C1lc  N1lc  C2lc  H2lcb  .  .  .  .  -135(3)  ?
  C1lc  N1lc  C2lc  H2lcc  .  .  .  .  105(4)  ?
  C3lc  N1lc  C2lc  H2lca  .  .  .  .  161(3)  ?
  C3lc  N1lc  C2lc  H2lcb  .  .  .  .  41(3)  ?
  C3lc  N1lc  C2lc  H2lcc  .  .  .  .  -79(4)  ?
  C1lc  N1lc  C3lc  H3lca  .  .  .  .  153(3)  ?
  C1lc  N1lc  C3lc  H3lcb  .  .  .  .  33(3)  ?
  C1lc  N1lc  C3lc  H3lcc  .  .  .  .  -87(4)  ?
  C2lc  N1lc  C3lc  H3lca  .  .  .  .  -22(3)  ?
  C2lc  N1lc  C3lc  H3lcb  .  .  .  .  -142(2)  ?
  C2lc  N1lc  C3lc  H3lcc  .  .  .  .  98(3)  ?
  Li4  O1ld  C1ld  N1ld  .  .  .  .  -11(8)  ?
  Li4  O1ld  C1ld  H1ld  .  .  .  .  169(6)  ?
  C2ld  N1ld  C1ld  O1ld  .  .  .  .  9(3)  ?
  C2ld  N1ld  C1ld  H1ld  .  .  .  .  -171(2)  ?
  C3ld  N1ld  C1ld  O1ld  .  .  .  .  172(2)  ?
  C3ld  N1ld  C1ld  H1ld  .  .  .  .  -8(4)  ?
  C1ld  N1ld  C2ld  H2lda  .  .  .  .  -20(3)  ?
  C1ld  N1ld  C2ld  H2ldb  .  .  .  .  -140(2)  ?
  C1ld  N1ld  C2ld  H2ldc  .  .  .  .  100(3)  ?
  C3ld  N1ld  C2ld  H2lda  .  .  .  .  177(2)  ?
  C3ld  N1ld  C2ld  H2ldb  .  .  .  .  57(3)  ?
  C3ld  N1ld  C2ld  H2ldc  .  .  .  .  -63(4)  ?
  C1ld  N1ld  C3ld  H3lda  .  .  .  .  162(3)  ?
  C1ld  N1ld  C3ld  H3ldb  .  .  .  .  42(3)  ?
  C1ld  N1ld  C3ld  H3ldc  .  .  .  .  -78(4)  ?
  C2ld  N1ld  C3ld  H3lda  .  .  .  .  -34(4)  ?
  C2ld  N1ld  C3ld  H3ldb  .  .  .  .  -154(2)  ?
  C2ld  N1ld  C3ld  H3ldc  .  .  .  .  86(3)  ?
  Li4  O1le  C1le  N1le  .  .  .  .  141(3)  ?
  Li4  O1le  C1le  H1le  .  .  .  .  -39(4)  ?
  C2le  N1le  C1le  O1le  .  .  .  .  -1(5)  ?
  C2le  N1le  C1le  H1le  .  .  .  .  179(3)  ?
  C3le  N1le  C1le  O1le  .  .  .  .  167(3)  ?
  C3le  N1le  C1le  H1le  .  .  .  .  -13(5)  ?
  C1le  N1le  C2le  H2lea  .  .  .  .  141(3)  ?
  C1le  N1le  C2le  H2leb  .  .  .  .  21(3)  ?
  C1le  N1le  C2le  H2lec  .  .  .  .  -99(3)  ?
  C3le  N1le  C2le  H2lea  .  .  .  .  -31(4)  ?
  C3le  N1le  C2le  H2leb  .  .  .  .  -151(2)  ?
  C3le  N1le  C2le  H2lec  .  .  .  .  89(3)  ?
  C1le  N1le  C3le  H3lea  .  .  .  .  -128(4)  ?
  C1le  N1le  C3le  H3leb  .  .  .  .  112(4)  ?
  C1le  N1le  C3le  H3lec  .  .  .  .  -8(6)  ?
  C2le  N1le  C3le  H3lea  .  .  .  .  41(3)  ?
  C2le  N1le  C3le  H3leb  .  .  .  .  -79(4)  ?
  C2le  N1le  C3le  H3lec  .  .  .  .  161(3)  ?
  Li4  O1lf  C1lf  N1lf  .  .  .  .  161(3)  ?
  Li4  O1lf  C1lf  H1lf  .  .  .  .  -19(5)  ?
  C2lf  N1lf  C1lf  O1lf  .  .  .  .  -165(2)  ?
  C2lf  N1lf  C1lf  H1lf  .  .  .  .  16(4)  ?
  C3lf  N1lf  C1lf  O1lf  .  .  .  .  11(4)  ?
  C3lf  N1lf  C1lf  H1lf  .  .  .  .  -169(3)  ?
  C1lf  N1lf  C2lf  H2lfa  .  .  .  .  -123(3)  ?
  C1lf  N1lf  C2lf  H2lfb  .  .  .  .  117(3)  ?
  C1lf  N1lf  C2lf  H2lfc  .  .  .  .  -3(3)  ?
  C3lf  N1lf  C2lf  H2lfa  .  .  .  .  62(4)  ?
  C3lf  N1lf  C2lf  H2lfb  .  .  .  .  -58(4)  ?
  C3lf  N1lf  C2lf  H2lfc  .  .  .  .  -178(3)  ?
  C1lf  N1lf  C3lf  H3lfa  .  .  .  .  141(3)  ?
  C1lf  N1lf  C3lf  H3lfb  .  .  .  .  21(3)  ?
  C1lf  N1lf  C3lf  H3lfc  .  .  .  .  -99(3)  ?
  C2lf  N1lf  C3lf  H3lfa  .  .  .  .  -44(5)  ?
  C2lf  N1lf  C3lf  H3lfb  .  .  .  .  -164(2)  ?
  C2lf  N1lf  C3lf  H3lfc  .  .  .  .  76(3)  ?
  C2la  N1la  C1la  O1la  .  .  .  .  5(4)  ?
  C2la  N1la  C1la  H1la  .  .  .  .  -175(3)  ?
  C3la  N1la  C1la  O1la  .  .  .  .  -177(3)  ?
  C3la  N1la  C1la  H1la  .  .  .  .  3(5)  ?
  C1la  N1la  C2la  H2laa  .  .  .  .  -61(4)  ?
  C1la  N1la  C2la  H2lab  .  .  .  .  178(3)  ?
  C1la  N1la  C2la  H2lac  .  .  .  .  58(3)  ?
  C3la  N1la  C2la  H2laa  .  .  .  .  120(4)  ?
  C3la  N1la  C2la  H2lab  .  .  .  .  0(4)  ?
  C3la  N1la  C2la  H2lac  .  .  .  .  -120(3)  ?
  C1la  N1la  C3la  H3laa  .  .  .  .  28(5)  ?
  C1la  N1la  C3la  H3lab  .  .  .  .  -92(3)  ?
  C1la  N1la  C3la  H3lac  .  .  .  .  148(3)  ?
  C2la  N1la  C3la  H3laa  .  .  .  .  -154(3)  ?
  C2la  N1la  C3la  H3lab  .  .  .  .  86(4)  ?
  C2la  N1la  C3la  H3lac  .  .  .  .  -34(3)  ?
  C2lb  N1lb  C1lb  O1lb  .  .  .  .  9(4)  ?
  C2lb  N1lb  C1lb  H1lb  .  .  .  .  -171(3)  ?
  C3lb  N1lb  C1lb  O1lb  .  .  .  .  -161(2)  ?
  C3lb  N1lb  C1lb  H1lb  .  .  .  .  19(4)  ?
  C1lb  N1lb  C2lb  H2lba  .  .  .  .  49(5)  ?
  C1lb  N1lb  C2lb  H2lbb  .  .  .  .  -72(3)  ?
  C1lb  N1lb  C2lb  H2lbc  .  .  .  .  169(3)  ?
  C3lb  N1lb  C2lb  H2lba  .  .  .  .  -141(3)  ?
  C3lb  N1lb  C2lb  H2lbb  .  .  .  .  99(3)  ?
  C3lb  N1lb  C2lb  H2lbc  .  .  .  .  -21(3)  ?
  C1lb  N1lb  C3lb  H3lba  .  .  .  .  -66(5)  ?
  C1lb  N1lb  C3lb  H3lbb  .  .  .  .  174(3)  ?
  C1lb  N1lb  C3lb  H3lbc  .  .  .  .  54(4)  ?
  C2lb  N1lb  C3lb  H3lba  .  .  .  .  123(4)  ?
  C2lb  N1lb  C3lb  H3lbb  .  .  .  .  3(4)  ?
  C2lb  N1lb  C3lb  H3lbc  .  .  .  .  -117(3)  ?
 
loop_
_geom_hbond_atom_site_label_D
_geom_hbond_atom_site_label_H
_geom_hbond_atom_site_label_A
_geom_hbond_site_symmetry_D
_geom_hbond_site_symmetry_H
_geom_hbond_site_symmetry_A
_geom_hbond_distance_DH
_geom_hbond_distance_HA
_geom_hbond_distance_DA
_geom_hbond_angle_DHA
_geom_hbond_publ_flag               #<< enter yes for value to be published
      ?  ?  ?  ?  ?  ?  ?  ?  ?  ?  ?
 
 
#--------------------------------------------------------------------------
#      Special items requested by author for inclusion in paper
#--------------------------------------------------------------------------
 
loop_
_publ_manuscript_incl_extra_item
_publ_manuscript_incl_extra_defn
                       ?  ?
 
#--------------------------------------------------------------------------
#       Items which are non-mandatory for Acta C submissions
#--------------------------------------------------------------------------
 
loop_
_geom_contact_atom_site_label_1
_geom_contact_atom_site_label_2
_geom_contact_distance
_geom_contact_site_symmetry_1
_geom_contact_site_symmetry_2
_geom_contact_publ_flag
  H2laa  H2lac  1.55(4)  .  .  ?
  H3laa  H3lab  1.55(3)  .  .  ?
  H3laa  H3lac  1.55(4)  .  .  ?
  H2ldb  H2ldc  1.55(3)  .  .  ?
  H3lab  H3lac  1.55(5)  .  .  ?
  H2lda  H2ldb  1.55(4)  .  .  ?
  H2laa  H2lab  1.55(4)  .  .  ?
  H2lba  H2lbc  1.55(3)  .  .  ?
  H3lca  H3lcb  1.55(4)  .  .  ?
  H2lda  H2ldc  1.55(3)  .  .  ?
  H3lea  H3lec  1.55(4)  .  .  ?
  H2lab  H2lac  1.55(5)  .  .  ?
  H3lda  H3ldb  1.55(4)  .  .  ?
  H3ldb  H3ldc  1.55(4)  .  .  ?
  H1ab  H1ac  1.5511(2)  .  .  ?
  H2lca  H2lcc  1.55(3)  .  .  ?
  H2lcb  H2lcc  1.55(3)  .  .  ?
  H1aa  H1ab  1.55118(13)  .  .  ?
  H1db  H1dc  1.55119(12)  .  .  ?
  H1da  H1db  1.5512(3)  .  .  ?
  H3lcb  H3lcc  1.55(4)  .  .  ?
  H1fb  H1fc  1.55120(17)  .  .  ?
  H2ba  H2bb  1.5512(2)  .  .  ?
  H1da  H1dc  1.55121(19)  .  .  ?
  H2ca  H2cb  1.5512(3)  .  .  ?
  H1ea  H1ec  1.5512(4)  .  .  ?
  H2lbb  H2lbc  1.55(5)  .  .  ?
  H2leb  H2lec  1.55(5)  .  .  ?
  H2da  H2db  1.5512(3)  .  .  ?
  H3lfb  H3lfc  1.55(4)  .  .  ?
  H1ca  H1cb  1.55128(14)  .  .  ?
  H1bb  H1bc  1.55129(12)  .  .  ?
  H1fa  H1fc  1.5513(5)  .  .  ?
  H1ea  H1eb  1.55130(16)  .  .  ?
  H2ea  H2eb  1.55131(17)  .  .  ?
  H1aa  H1ac  1.5513(3)  .  .  ?
  H1ba  H1bc  1.5513(3)  .  .  ?
  H1ca  H1cc  1.5513(3)  .  .  ?
  H2fa  H2fb  1.55133(17)  .  .  ?
  H3lca  H3lcc  1.55(2)  .  .  ?
  H1ba  H1bb  1.5513(3)  .  .  ?
  H1eb  H1ec  1.5513(2)  .  .  ?
  H2aa  H2ab  1.5513(3)  .  .  ?
  H3lfa  H3lfb  1.55(3)  .  .  ?
  H3lbb  H3lbc  1.55(5)  .  .  ?
  H3lba  H3lbb  1.55(4)  .  .  ?
  H2lfb  H2lfc  1.55(4)  .  .  ?
  H1cb  H1cc  1.5514(2)  .  .  ?
  H2lfa  H2lfc  1.55(4)  .  .  ?
  H1fa  H1fb  1.55146(19)  .  .  ?
  H2lba  H2lbb  1.55(3)  .  .  ?
  H3lda  H3ldc  1.55(3)  .  .  ?
  H2lfa  H2lfb  1.55(3)  .  .  ?
  H3lfa  H3lfc  1.55(3)  .  .  ?
  H2lea  H2lec  1.55(3)  .  .  ?
  H3lea  H3leb  1.55(4)  .  .  ?
  H2lea  H2leb  1.55(3)  .  .  ?
  H2lca  H2lcb  1.55(5)  .  .  ?
  H3lba  H3lbc  1.55(4)  .  .  ?
  H3leb  H3lec  1.55(4)  .  .  ?
  N1la  H3lab  1.73(4)  .  .  ?
  N1la  H3laa  1.73(4)  .  .  ?
  N1la  H3lac  1.73(5)  .  .  ?
  O1le  H1le  1.78(3)  .  .  ?
  O1la  H1la  1.80(4)  .  .  ?
  O1lc  H1lc  1.85(4)  .  .  ?
  O1ld  H1ld  1.86(4)  .  .  ?
  N1le  H1le  1.87(4)  .  .  ?
  C6e  H7e  1.91(3)  .  .  ?
  C5b  H6b  1.92(3)  .  .  ?
  N1ld  H1ld  1.92(4)  .  .  ?
  N1lf  H3lfa  1.93(4)  .  .  ?
  N1lf  H3lfc  1.93(3)  .  .  ?
  N1lf  H3lfb  1.93(4)  .  .  ?
  N1ld  H3lda  1.93(4)  .  .  ?
  N1ld  H3ldc  1.93(2)  .  .  ?
  N1ld  H3ldb  1.93(4)  .  .  ?
  N1lb  H1lb  1.94(4)  .  .  ?
  H2lbb  H5c  1.94(3)  .  '4 465'  ?
  N1le  H3lea  1.94(2)  .  .  ?
  N1le  H3leb  1.94(4)  .  .  ?
  N1le  H3lec  1.94(2)  .  .  ?
  O1lf  H1lf  1.95(3)  .  .  ?
  N1lc  H2lcc  1.95(4)  .  .  ?
  N1lc  H2lca  1.95(3)  .  .  ?
  N1lc  H2lcb  1.95(3)  .  .  ?
  N1lb  H3lba  1.95(4)  .  .  ?
  N1lb  H3lbb  1.95(3)  .  .  ?
  N1lb  H3lbc  1.95(3)  .  .  ?
  C3c  H2ca  1.96(3)  .  .  ?
  C1e  H2eb  1.97(4)  .  .  ?
  C3c  H2cb  1.98(3)  .  .  ?
  C6b  H7b  1.98(3)  .  .  ?
  H2lea  H3lea  1.98(3)  .  .  ?
  C1f  H2fa  1.98(3)  .  .  ?
  C3f  H2fa  1.98(2)  .  .  ?
  C2e  H1eb  1.98(3)  .  .  ?
  C6b  H5b  1.98(3)  .  .  ?
  C4d  H5d  1.98(3)  .  .  ?
  N1lc  H1lc  1.99(4)  .  .  ?
  C6c  H7c  1.99(3)  .  .  ?
  C2b  H1bb  1.99(3)  .  .  ?
  C5e  H6e  1.99(3)  .  .  ?
  O1lb  H1lb  1.99(4)  .  .  ?
  C8e  H7e  1.99(3)  .  .  ?
  C2e  H1ec  1.99(3)  .  .  ?
  C1c  H2ca  1.99(4)  .  .  ?
  C3d  H2db  1.99(2)  .  .  ?
  C7c  H6c  1.99(3)  .  .  ?
  N1la  H1la  1.99(3)  .  .  ?
  C6f  H5f  2.00(3)  .  .  ?
  C7f  H6f  2.000(16)  .  .  ?
  C8c  H7c  2.00(3)  .  .  ?
  C2e  H1ea  2.00(4)  .  .  ?
  C6a  H5a  2.01(3)  .  .  ?
  C2a  H1aa  2.01(3)  .  .  ?
  C2b  H1ba  2.01(3)  .  .  ?
  C3d  H2da  2.01(4)  .  .  ?
  N1lc  H3lcb  2.01(4)  .  .  ?
  N1lc  H3lcc  2.01(3)  .  .  ?
  N1lc  H3lca  2.01(5)  .  .  ?
  C1d  H2db  2.01(3)  .  .  ?
  C8f  H7f  2.01(3)  .  .  ?
  C2a  H1ab  2.01(3)  .  .  ?
  C1d  H2da  2.01(3)  .  .  ?
  C1b  H2ba  2.01(4)  .  .  ?
  C1a  H2ab  2.02(2)  .  .  ?
  C7d  H6d  2.02(3)  .  .  ?
  C3f  H2fb  2.019(17)  .  .  ?
  C8b  H7b  2.02(3)  .  .  ?
  C3b  H2bb  2.02(3)  .  .  ?
  N1ld  H2ldb  2.02(3)  .  .  ?
  N1ld  H2ldc  2.02(4)  .  .  ?
  N1ld  H2lda  2.02(3)  .  .  ?
  C5c  H6c  2.03(3)  .  .  ?
  C6e  H5e  2.03(3)  .  .  ?
  C4c  H5c  2.03(3)  .  .  ?
  C2a  H1ac  2.03(3)  .  .  ?
  C6d  H5d  2.03(3)  .  .  ?
  C5a  H6a  2.03(3)  .  .  ?
  C1b  H2bb  2.03(3)  .  .  ?
  N1la  H2lab  2.03(3)  .  .  ?
  N1la  H2lac  2.03(3)  .  .  ?
  N1la  H2laa  2.03(4)  .  .  ?
  C2c  H1cb  2.04(3)  .  .  ?
  C2b  H1bc  2.04(3)  .  .  ?
  C3e  H2eb  2.037(19)  .  .  ?
  C3b  H2ba  2.04(2)  .  .  ?
  C7e  H6e  2.041(17)  .  .  ?
  N1lf  H1lf  2.04(4)  .  .  ?
  C4a  H5a  2.04(3)  .  .  ?
  C6c  H5c  2.04(3)  .  .  ?
  C2c  H1cc  2.05(3)  .  .  ?
  C3a  H2ab  2.05(3)  .  .  ?
  N1le  H2lec  2.05(3)  .  .  ?
  N1le  H2leb  2.05(4)  .  .  ?
  C1a  H2aa  2.05(3)  .  .  ?
  N1le  H2lea  2.05(4)  .  .  ?
  H1lf  H2lfc  2.05(4)  .  .  ?
  N1lf  H2lfb  2.05(4)  .  .  ?
  N1lf  H2lfc  2.05(4)  .  .  ?
  N1lf  H2lfa  2.05(2)  .  .  ?
  C7b  H6b  2.05(3)  .  .  ?
  C1e  H2ea  2.05(3)  .  .  ?
  C4f  H5f  2.056(16)  .  .  ?
  C4e  H5e  2.059(15)  .  .  ?
  C2c  H1ca  2.06(3)  .  .  ?
  C3a  H2aa  2.06(3)  .  .  ?
  C1c  H2cb  2.06(3)  .  .  ?
  H3lac  H2lab  2.06(4)  .  .  ?
  C8a  H7a  2.06(3)  .  .  ?
  C8d  H7d  2.07(3)  .  .  ?
  H2aa  H5a  2.0731(3)  .  .  ?
  C5f  H6f  2.08(3)  .  .  ?
  C6a  H7a  2.08(3)  .  .  ?
  C3e  H2ea  2.08(2)  .  .  ?
  C7a  H6a  2.09(4)  .  .  ?
  H3lca  H2lcb  2.09(3)  .  .  ?
  C2d  H1dc  2.09(3)  .  .  ?
  H3lab  H5a  2.09(3)  .  '4 564'  ?
  C6d  H7d  2.10(3)  .  .  ?
  C1f  H2fb  2.10(4)  .  .  ?
  C2d  H1db  2.10(3)  .  .  ?
  C2f  H1fa  2.10(4)  .  .  ?
  H2ca  H1cb  2.10624(17)  .  .  ?
  H2cb  H1cc  2.1104(2)  .  .  ?
  C6f  H7f  2.12(3)  .  .  ?
  C2f  H1fb  2.12(3)  .  .  ?
  C2f  H1fc  2.12(3)  .  .  ?
  C5d  H6d  2.12(3)  .  .  ?
  C2d  H1da  2.12(3)  .  .  ?
  H3lba  H6b  2.13(3)  .  '4 565'  ?
  H2aa  H1ab  2.1457(2)  .  .  ?
  H2ab  H1ac  2.1462(2)  .  .  ?
  N1lb  H2lba  2.15(4)  .  .  ?
  N1lb  H2lbc  2.15(4)  .  .  ?
  N1lb  H2lbb  2.15(4)  .  .  ?
  H2ea  H1ea  2.1563(2)  .  .  ?
  H2eb  H1eb  2.1580(2)  .  .  ?
  H2laa  H6d  2.17(3)  .  '4 464'  ?
  H2ldc  H1aa  2.171(11)  .  '3 545'  ?
  H2fb  H5f  2.1724(2)  .  .  ?
  C4b  H5b  2.18(3)  .  .  ?
  H2ba  H5b  2.1889(3)  .  .  ?
  H1la  H3laa  2.20(5)  .  .  ?
  H5b  H6b  2.2097(2)  .  .  ?
  H3lbb  H2lbc  2.21(4)  .  .  ?
  H5e  H6e  2.2131(2)  .  .  ?
  H1ld  H3ldb  2.23(4)  .  .  ?
  H2da  H1dc  2.2286(3)  .  .  ?
  H2db  H5d  2.2286(3)  .  .  ?
  O2a  C8a  2.23(4)  .  .  ?
  O1ld  N1ld  2.24(4)  .  .  ?
  H2db  H1db  2.23750(19)  .  .  ?
  C1la  C3la  2.25(4)  .  .  ?
  O1lf  N1lf  2.25(3)  .  .  ?
  O1a  H1aa  2.25(3)  .  .  ?
  C9e  O3e  2.26(4)  .  .  ?
  H2fa  H5f  2.2589(2)  .  .  ?
  O1la  N1la  2.26(4)  .  .  ?
  H7f  H6d  2.2648(2)  .  '4 464'  ?
  H6b  H7b  2.2656(3)  .  .  ?
  H1lc  H7c  2.27(3)  .  '2 565'  ?
  H2ba  H1bb  2.26873(19)  .  .  ?
  H2lba  H1fc  2.27(3)  .  .  ?
  O1le  N1le  2.28(4)  .  .  ?
  O3c  C9c  2.28(4)  .  .  ?
  H2fa  H1fa  2.2772(2)  .  .  ?
  H7f  H6f  2.2822(5)  .  .  ?
  H2fb  H1fb  2.2834(2)  .  .  ?
  H2bb  H1bc  2.2872(4)  .  .  ?
  O1e  H1ec  2.29(3)  .  .  ?
  O3d  C9d  2.29(4)  .  .  ?
  C2la  C3la  2.29(4)  .  .  ?
  O2e  C8e  2.29(4)  .  .  ?
  C8d  O2d  2.30(4)  .  .  ?
  O1lb  N1lb  2.30(4)  .  .  ?
  O2b  C8b  2.30(4)  .  .  ?
  O1lf  H3lfb  2.30(4)  .  .  ?
  H2ea  H5e  2.2998(2)  .  .  ?
  C1ld  C3ld  2.30(4)  .  .  ?
  H5a  H6a  2.3062(2)  .  .  ?
  H6e  H7e  2.3087(5)  .  .  ?
  O1f  C4f  2.31(4)  .  .  ?
  C2la  H3lac  2.31(4)  .  .  ?
  H7c  H6c  2.3153(3)  .  .  ?
  O1c  H1ca  2.32(3)  .  .  ?
  C1lf  H2lfc  2.32(3)  .  .  ?
  C1la  H3laa  2.32(5)  .  .  ?
  C6a  C4a  2.33(4)  .  .  ?
  O1c  C4c  2.33(4)  .  .  ?
  H6c  H5c  2.3267(2)  .  .  ?
  H2bb  H5b  2.3316(2)  .  .  ?
  C6b  C4b  2.33(4)  .  .  ?
  O1d  C4d  2.33(4)  .  .  ?
  O1c  C2c  2.33(5)  .  .  ?
  C2le  C3le  2.34(3)  .  .  ?
  H2ca  H5c  2.3364(4)  .  .  ?
  H2cb  H5c  2.3425(2)  .  .  ?
  C3le  H2lea  2.34(4)  .  .  ?
  C1lb  C3lb  2.34(3)  .  .  ?
  H3laa  H1ec  2.34(3)  .  .  ?
  H2bb  H1ba  2.3461(2)  .  .  ?
  C9b  O3b  2.35(4)  .  .  ?
  C7b  O3b  2.35(4)  .  .  ?
  H2ba  H1bc  2.3523(2)  .  .  ?
  C2le  H3lea  2.353(17)  .  .  ?
  O2f  C8f  2.35(4)  .  .  ?
  C7a  O3a  2.36(5)  .  .  ?
  C1lf  C2lf  2.36(3)  .  .  ?
  O1lb  H5f  2.360(13)  .  '2 575'  ?
  O1b  C2b  2.36(4)  .  .  ?
  C7c  C5c  2.36(4)  .  .  ?
  O1f  C2f  2.364(19)  .  .  ?
  C5f  C9f  2.37(2)  .  .  ?
  H1fa  H6f  2.3666(3)  .  '2 575'  ?
  C3la  H2lab  2.37(4)  .  .  ?
  H6a  H7a  2.3695(3)  .  .  ?
  C5f  C7f  2.37(4)  .  .  ?
  C5d  C7d  2.37(4)  .  .  ?
  C8a  C6a  2.37(5)  .  .  ?
  C9a  O3a  2.37(4)  .  .  ?
  O1lc  N1lc  2.38(4)  .  .  ?
  C9a  C5a  2.38(5)  .  .  ?
  C8d  C6d  2.38(4)  .  .  ?
  O3f  C9f  2.38(4)  .  .  ?
  C9d  C5d  2.38(4)  .  .  ?
  C6b  C8b  2.38(4)  .  .  ?
  C8a  C4a  2.38(4)  .  .  ?
  C4b  C8b  2.38(4)  .  .  ?
  O1e  C2e  2.381(18)  .  .  ?
  C2f  H5f  2.38(4)  .  .  ?
  C8f  C6f  2.38(2)  .  .  ?
  H7d  H6d  2.3859(4)  .  .  ?
  H1ld  H7a  2.39(3)  .  '2 564'  ?
  C7e  O3e  2.39(2)  .  .  ?
  H1le  H1db  2.39(3)  .  .  ?
  O1lf  H2lda  2.39(4)  .  .  ?
  C2lc  H3lca  2.39(4)  .  .  ?
  H2lec  H1bc  2.39(3)  .  '2 564'  ?
  C2lc  C3lc  2.39(4)  .  .  ?
  H2lcc  H1ca  2.396(13)  .  '3 445'  ?
  H2da  H5d  2.3960(2)  .  .  ?
  C9a  C7a  2.40(4)  .  .  ?
  H6d  H5d  2.4002(2)  .  .  ?
  C8e  C6e  2.401(18)  .  .  ?
  O3f  C7f  2.401(19)  .  .  ?
  C1lf  C3lf  2.40(4)  .  .  ?
  C7f  C9f  2.40(4)  .  .  ?
  O1b  C4b  2.41(4)  .  .  ?
  C8c  O2c  2.41(4)  .  .  ?
  O1a  C2a  2.41(4)  .  .  ?
  H3lab  H2aa  2.41(3)  .  '4 564'  ?
  C1le  C2le  2.41(4)  .  .  ?
  C3ld  H1ld  2.41(4)  .  .  ?
  H1la  H5e  2.413(18)  .  '2 574'  ?
  O2b  C4b  2.41(4)  .  .  ?
  C8c  C6c  2.42(5)  .  .  ?
  H3lcb  H3lea  2.42(3)  .  '2 565'  ?
  C9e  C7e  2.42(4)  .  .  ?
  H6f  H5f  2.4201(3)  .  .  ?
  H2fb  H1fa  2.4234(2)  .  .  ?
  C1ld  C2ld  2.42(4)  .  .  ?
  C4e  C6e  2.43(4)  .  .  ?
  C7b  C9b  2.43(4)  .  .  ?
  O1d  C2d  2.43(4)  .  .  ?
  H2db  H1dc  2.4292(2)  .  .  ?
  O1ld  H2lda  2.43(4)  .  .  ?
  H2fa  H1fc  2.4311(3)  .  .  ?
  O1e  C4e  2.43(4)  .  .  ?
  H1lf  H1bb  2.43(3)  .  .  ?
  H2ab  H5a  2.4372(2)  .  .  ?
  H2ldb  H3lda  2.44(3)  .  .  ?
  C9c  C5c  2.44(5)  .  .  ?
  C7e  C5e  2.44(5)  .  .  ?
  C1lc  C2lc  2.44(4)  .  .  ?
  C7b  C5b  2.44(4)  .  .  ?
  C1ld  H3ldb  2.44(4)  .  .  ?
  C5d  C3d  2.44(4)  .  .  ?
  O3d  C7d  2.44(4)  .  .  ?
  H2da  H1da  2.4417(2)  .  .  ?
  C5a  C7a  2.44(5)  .  .  ?
  C4f  C8f  2.44(5)  .  .  ?
  C4f  C6f  2.45(4)  .  .  ?
  C4f  O2f  2.45(2)  .  .  ?
  C8e  C4e  2.45(5)  .  .  ?
  C9b  C5b  2.45(4)  .  .  ?
  C3lc  H2lcb  2.45(3)  .  .  ?
  H2eb  H5e  2.4519(3)  .  .  ?
  C1lf  H3lfb  2.45(4)  .  .  ?
  C3a  H1aa  2.45(3)  .  .  ?
  C4c  O2c  2.46(5)  .  .  ?
  C2d  H5d  2.46(3)  .  .  ?
  C2lf  H1lf  2.46(4)  .  .  ?
  C3la  H1la  2.46(4)  .  .  ?
  H3ldc  H1aa  2.46(3)  .  '3 545'  ?
  O2a  C4a  2.46(5)  .  .  ?
  H1fa  H7f  2.4657(5)  .  '2 575'  ?
  O1a  C4a  2.47(4)  .  .  ?
  C9c  C7c  2.47(4)  .  .  ?
  H3lfc  H1dc  2.47(3)  .  '2 565'  ?
  O3c  C7c  2.47(5)  .  .  ?
  O2d  C4d  2.47(4)  .  .  ?
  C9e  C5e  2.47(2)  .  .  ?
  O2e  C4e  2.473(18)  .  .  ?
  C4d  C2d  2.47(4)  .  .  ?
  C1la  C2la  2.47(3)  .  .  ?
  C3e  C5e  2.47(5)  .  .  ?
  O2d  O3d  2.47(4)  .  .  ?
  C9d  C7d  2.47(4)  .  .  ?
  C1lc  H2lca  2.48(3)  .  .  ?
  C3f  C1f  2.48(5)  .  .  ?
  C1le  H2leb  2.48(4)  .  .  ?
  C8d  C4d  2.48(4)  .  .  ?
  H2lfb  H1dc  2.48(2)  .  '2 565'  ?
  O2a  O3a  2.49(4)  .  .  ?
  C3a  C5a  2.49(4)  .  .  ?
  C2a  H5a  2.49(3)  .  .  ?
  H3leb  H1bc  2.49(2)  .  '2 564'  ?
  C2ld  C3ld  2.50(4)  .  .  ?
  H2eb  H1ea  2.4955(2)  .  .  ?
  H2ea  H1ec  2.4984(3)  .  .  ?
  O1f  H1fc  2.50(3)  .  .  ?
  H1le  H3lec  2.50(3)  .  .  ?
  C1le  C3le  2.50(3)  .  .  ?
  O1d  H1da  2.50(3)  .  .  ?
  C9a  C3a  2.50(4)  .  .  ?
  H2cb  H1cb  2.5023(5)  .  .  ?
  C4c  C8c  2.50(4)  .  .  ?
  C2lb  H3lbb  2.51(4)  .  .  ?
  C1ld  H2lda  2.51(3)  .  .  ?
  C3f  C5f  2.51(5)  .  .  ?
  C3f  C9f  2.51(4)  .  .  ?
  C3c  C5c  2.51(4)  .  .  ?
  O2b  O3b  2.51(4)  .  .  ?
  C3lb  H1lb  2.51(3)  .  .  ?
  C4f  C2f  2.51(4)  .  .  ?
  H2ca  H1ca  2.5130(3)  .  .  ?
  C2c  H5c  2.51(3)  .  .  ?
  C3a  C1a  2.51(4)  .  .  ?
  O3f  O2f  2.52(5)  .  .  ?
  C3b  C9b  2.52(4)  .  .  ?
  C9d  C3d  2.52(4)  .  .  ?
  C3b  C1b  2.53(4)  .  .  ?
  H2lea  H1ea  2.53(3)  .  '3 445'  ?
  C4c  C6c  2.53(4)  .  .  ?
  H1lb  H3lba  2.53(4)  .  .  ?
  C3e  H1ec  2.53(3)  .  .  ?
  H3lbc  H1cb  2.54(3)  .  '4 465'  ?
  H2lac  H1ab  2.54(3)  .  '4 564'  ?
  C4c  C2c  2.54(4)  .  .  ?
  O2e  O3e  2.54(5)  .  .  ?
  O1le  H2leb  2.54(4)  .  .  ?
  O1lc  H2lca  2.55(4)  .  .  ?
  C3c  H1ca  2.55(3)  .  .  ?
  C4d  C6d  2.55(5)  .  .  ?
  O3c  O2c  2.55(4)  .  .  ?
  C1lb  H3lbc  2.55(2)  .  .  ?
  C3c  C1c  2.55(4)  .  .  ?
  H1lc  H3lcb  2.56(4)  .  .  ?
  H2lca  H2ba  2.557(8)  .  .  ?
  C2ld  H3lda  2.56(4)  .  .  ?
  H1ea  H6e  2.5591(3)  .  '2 574'  ?
  C2b  H5b  2.56(3)  .  .  ?
  C9c  C3c  2.57(4)  .  .  ?
  C3d  H5d  2.57(3)  .  .  ?
  H1lb  H3lbc  2.57(2)  .  .  ?
  C3e  C1e  2.57(5)  .  .  ?
  C9e  C3e  2.57(4)  .  .  ?
  C3d  C1d  2.57(4)  .  .  ?
  C1lc  C3lc  2.57(4)  .  .  ?
  C3b  C5b  2.57(4)  .  .  ?
  O1le  H2lca  2.58(4)  .  .  ?
  O3e  H7e  2.580(15)  .  .  ?
  C1lb  C2lb  2.58(4)  .  .  ?
  C2lb  C3lb  2.58(4)  .  .  ?
  H3lfa  H1fa  2.59(3)  .  '3 545'  ?
  H3lba  H1ac  2.59(3)  .  '4 565'  ?
  H2lfc  H1ba  2.59(3)  .  .  ?
  C2a  C4a  2.60(4)  .  .  ?
  N1lc  H1ca  2.60(2)  .  '3 445'  ?
  H2ldb  H2fa  2.61(3)  .  '3 545'  ?
  C3c  H5c  2.61(3)  .  .  ?
  C3f  H5f  2.62(3)  .  .  ?
  C4e  C2e  2.62(4)  .  .  ?
  C3lb  H2lbc  2.62(4)  .  .  ?
  H2ab  H1ab  2.6189(6)  .  .  ?
  H2lca  H1bb  2.62(2)  .  .  ?
  H1le  H1da  2.62(3)  .  .  ?
  C3f  H1fc  2.62(3)  .  .  ?
  C2e  H5e  2.62(3)  .  .  ?
  H2aa  H1aa  2.6237(3)  .  .  ?
  O3a  H7a  2.62(3)  .  .  ?
  C1lb  H3lba  2.63(4)  .  .  ?
  O1ld  H7a  2.63(3)  .  '2 564'  ?
  H1la  H6e  2.64(2)  .  '2 574'  ?
  O3d  H7d  2.64(3)  .  .  ?
  H3ldb  H2lfa  2.64(4)  .  '2 564'  ?
  O3b  H7b  2.65(3)  .  .  ?
  C2le  H3leb  2.65(4)  .  .  ?
  C4b  C2b  2.65(4)  .  .  ?
  C1ld  H3ldc  2.65(4)  .  .  ?
  O3f  H7f  2.651(17)  .  .  ?
  C2lf  C3lf  2.65(3)  .  .  ?
  C1le  H3lec  2.65(3)  .  .  ?
  H3lab  H2lab  2.65(4)  .  .  ?
  C3a  H5a  2.66(3)  .  .  ?
  O1lf  C3lf  2.66(4)  .  .  ?
  C8d  C5d  2.67(4)  .  .  ?
  C4d  H2db  2.67(2)  .  .  ?
  H1ld  H3ldc  2.67(4)  .  .  ?
  C6e  H1fb  2.67(3)  .  .  ?
  C5a  H2aa  2.67(3)  .  .  ?
  H2aa  H1ac  2.6722(3)  .  .  ?
  O1lb  H5d  2.68(3)  .  '4 465'  ?
  C5b  H2ba  2.68(2)  .  .  ?
  H2ab  H1aa  2.6763(6)  .  .  ?
  O3c  H7c  2.68(3)  .  .  ?
  H2ea  H5b  2.6765(6)  .  3  ?
  C3le  H1le  2.68(4)  .  .  ?
  O1lc  H7c  2.68(3)  .  '2 565'  ?
  C2la  H3lab  2.68(4)  .  .  ?
  H2ca  H1cc  2.6798(3)  .  .  ?
  C3d  H1da  2.68(3)  .  .  ?
  H1eb  H6e  2.6861(2)  .  '2 574'  ?
  H2cb  H1ca  2.6862(6)  .  .  ?
  H2ldb  H2db  2.686(10)  .  .  ?
  C3e  H5e  2.69(3)  .  .  ?
  C1la  H2lac  2.69(2)  .  .  ?
  O3f  H7d  2.69(3)  .  '4 464'  ?
  C1la  H3lab  2.69(4)  .  .  ?
  H2lea  H3leb  2.69(4)  .  .  ?
  O1f  C1f  2.70(3)  .  .  ?
  H2leb  H1ea  2.70(3)  .  '3 445'  ?
  O1la  H5e  2.700(14)  .  '2 574'  ?
  C3ld  H2ldb  2.70(3)  .  .  ?
  C3lc  H1lc  2.71(4)  .  .  ?
  C1lc  H3lcb  2.71(5)  .  .  ?
  Ti2  C8b  2.71(4)  .  .  ?
  C1la  H2laa  2.71(4)  .  .  ?
  H2lbb  H2ca  2.71(3)  .  '4 465'  ?
  C4c  H2ca  2.71(3)  .  .  ?
  O3f  O3b  2.71(3)  .  .  ?
  H3lca  H2lcc  2.72(5)  .  .  ?
  C4d  H2da  2.72(3)  .  .  ?
  C9a  C6a  2.72(5)  .  .  ?
  N1ld  H1aa  2.72(2)  .  '3 545'  ?
  C3lc  H2lcc  2.72(4)  .  .  ?
  C5f  C8f  2.72(3)  .  .  ?
  H2ea  H1eb  2.7251(2)  .  .  ?
  H2lec  H3leb  2.73(3)  .  .  ?
  H2eb  H1ec  2.7270(3)  .  .  ?
  C6b  C9b  2.73(4)  .  .  ?
  O1c  C1c  2.73(5)  .  .  ?
  C4f  H2fb  2.73(3)  .  .  ?
  H3lfc  H6c  2.731(7)  .  '2 565'  ?
  H2lda  H3lfb  2.73(4)  .  .  ?
  H2lcb  H2ba  2.736(13)  .  .  ?
  C4f  H2fa  2.74(3)  .  .  ?
  C1la  H2ab  2.74(2)  .  '4 564'  ?
  O1e  C1e  2.74(3)  .  .  ?
  C5f  H2fb  2.74(3)  .  .  ?
  C3le  H2lec  2.74(2)  .  .  ?
  C3ld  H2ldc  2.74(4)  .  .  ?
  C3b  H1ba  2.75(3)  .  .  ?
  H7e  H6b  2.7490(3)  .  '4 565'  ?
  O1c  O2c  2.75(4)  .  .  ?
  O1a  C1a  2.75(4)  .  .  ?
  Ti1  C8a  2.75(4)  .  .  ?
  O2b  O2f  2.755(13)  .  .  ?
  H1fb  H6f  2.7554(2)  .  '2 575'  ?
  Ti1  C8e  2.757(17)  .  .  ?
  C5d  H2db  2.76(3)  .  .  ?
  O3c  O3f  2.760(18)  .  .  ?
  C7b  C4b  2.76(4)  .  .  ?
  O2f  O2c  2.76(4)  .  .  ?
  C4c  H2cb  2.76(3)  .  .  ?
  C4a  H2aa  2.76(3)  .  .  ?
  H3lcc  H1ca  2.76(3)  .  '3 445'  ?
  C8a  C5a  2.76(4)  .  .  ?
  O2e  Li1  2.77(5)  .  .  ?
  H2bb  H1bb  2.7655(4)  .  .  ?
  O3e  H7b  2.77(3)  .  '4 565'  ?
  C4b  H2ba  2.77(2)  .  .  ?
  C5e  H2ea  2.77(4)  .  .  ?
  C7a  C4a  2.77(4)  .  .  ?
  C8c  C5c  2.77(5)  .  .  ?
  H2lcb  H1bc  2.77(2)  .  .  ?
  O3d  O3e  2.77(3)  .  .  ?
  H2ca  H6a  2.7728(6)  .  '4 564'  ?
  C3b  H5b  2.77(3)  .  .  ?
  O1b  H1ba  2.77(3)  .  .  ?
  O1lb  H2cb  2.780(17)  .  '4 465'  ?
  O1la  H2laa  2.78(4)  .  .  ?
  C9f  C6f  2.78(3)  .  .  ?
  H2da  H1db  2.7820(4)  .  .  ?
  C4a  H2ab  2.78(3)  .  .  ?
  O2a  O2e  2.79(4)  .  .  ?
  H2db  H1da  2.7858(2)  .  .  ?
  O1b  C1b  2.79(4)  .  .  ?
  O1d  C1d  2.79(4)  .  .  ?
  O1ld  C2ld  2.79(4)  .  .  ?
  C9e  C6e  2.79(3)  .  .  ?
  H3lfa  H2lfa  2.79(3)  .  .  ?
  O2d  O1d  2.79(3)  .  .  ?
  C2ld  H1aa  2.791(11)  .  '3 545'  ?
  H2ba  H1ba  2.7915(2)  .  .  ?
  C1lb  H2lba  2.79(4)  .  .  ?
  O1la  H2lac  2.79(2)  .  .  ?
  C4e  H2ea  2.80(3)  .  .  ?
  H2laa  H1cc  2.80(3)  .  '4 464'  ?
  O3d  O3a  2.80(5)  .  .  ?
  C5b  H2bb  2.80(3)  .  .  ?
  C4e  H2eb  2.80(3)  .  .  ?
  O2e  O1e  2.80(4)  .  .  ?
  O3e  O3a  2.798(18)  .  .  ?
  H2ldc  H3lda  2.80(5)  .  .  ?
  O1la  C2la  2.80(3)  .  .  ?
  H2lda  H2db  2.801(11)  .  .  ?
  O2b  O2c  2.80(4)  .  .  ?
  Li4  C1le  2.80(3)  .  .  ?
  C5f  H2fa  2.80(4)  .  .  ?
  O1f  O2f  2.81(4)  .  .  ?
  Ti1  C9e  2.81(2)  .  .  ?
  O3c  O3b  2.81(4)  .  .  ?
  H2fa  H1fb  2.8087(2)  .  .  ?
  C1lc  H7c  2.81(3)  .  '2 565'  ?
  C4f  C7f  2.81(5)  .  .  ?
  H2fb  H1fc  2.8105(3)  .  .  ?
  C3b  H1bb  2.81(2)  .  .  ?
  C1lb  H2cb  2.81(2)  .  '4 465'  ?
  H2lda  H1db  2.81(2)  .  .  ?
  C4b  H2bb  2.81(3)  .  .  ?
  H2lba  H1fb  2.81(2)  .  .  ?
  C3f  Li1  2.82(3)  .  .  ?
  H1la  H3lab  2.82(3)  .  .  ?
  C8e  C5e  2.82(3)  .  .  ?
  O1b  O2b  2.82(3)  .  .  ?
  C2lf  H3lfa  2.82(4)  .  .  ?
  H1ea  H7e  2.8204(5)  .  '2 574'  ?
  C5c  H2ca  2.82(3)  .  .  ?
  H3lac  H2laa  2.82(4)  .  .  ?
  C7e  C4e  2.82(5)  .  .  ?
  C2lb  H5c  2.82(3)  .  '4 465'  ?
  C5f  C2f  2.82(5)  .  .  ?
  H2ldc  H3ldc  2.82(3)  .  .  ?
  C5b  C8b  2.83(4)  .  .  ?
  Ti2  C8f  2.830(18)  .  .  ?
  C1ld  H7a  2.83(3)  .  '2 564'  ?
  O2a  O2d  2.83(4)  .  .  ?
  C3c  Li2  2.83(5)  .  .  ?
  O2e  O2d  2.833(13)  .  .  ?
  H3lcc  H7d  2.835(13)  .  '3 445'  ?
  Ti2  C9b  2.84(4)  .  .  ?
  O2a  O1a  2.84(4)  .  .  ?
  C3f  H1fb  2.84(3)  .  .  ?
  C1la  H5e  2.841(11)  .  '2 574'  ?
  O1f  C9f  2.85(5)  .  .  ?
  C9f  Li1  2.85(4)  .  .  ?
  C5a  H2ab  2.85(3)  .  .  ?
  O1lb  H2lba  2.85(5)  .  .  ?
  Ti2  C8c  2.85(4)  .  .  ?
  O1lb  H2da  2.85(3)  .  '4 465'  ?
  Ti1  C9a  2.85(4)  .  .  ?
  C3la  H5a  2.85(3)  .  '4 564'  ?
  Ti2  C9c  2.86(4)  .  .  ?
  C9d  C6d  2.86(4)  .  .  ?
  C9d  Li3  2.86(5)  .  .  ?
  C9c  C6c  2.86(4)  .  .  ?
  H1la  H2bb  2.86(3)  .  '4 564'  ?
  H3lbc  H1ac  2.86(3)  .  '4 565'  ?
  H2lfb  H1db  2.87(3)  .  '2 565'  ?
  C2lc  H3lcc  2.87(3)  .  .  ?
  H2lac  H2aa  2.87(3)  .  '4 564'  ?
  C5a  C2a  2.87(4)  .  .  ?
  H2lec  H6a  2.868(6)  .  '2 564'  ?
  O1b  C9b  2.87(4)  .  .  ?
  O1c  H2ca  2.87(3)  .  .  ?
  C4c  C7c  2.87(4)  .  .  ?
  Ti1  C9d  2.87(4)  .  .  ?
  O1b  H1bb  2.870(19)  .  .  ?
  O1le  C2le  2.87(4)  .  .  ?
  C5d  C2d  2.88(4)  .  .  ?
  H2lec  H3lea  2.878(11)  .  .  ?
  C5b  H2ab  2.88(3)  .  .  ?
  H3lcb  H3leb  2.88(3)  .  '2 565'  ?
  C9c  Li2  2.88(4)  .  .  ?
  C2ld  H3ldc  2.88(3)  .  .  ?
  O1f  H2fa  2.880(15)  .  .  ?
  H2da  H5c  2.8821(5)  .  .  ?
  H1le  H1lf  2.88(4)  .  .  ?
  H2ab  H5b  2.8842(6)  .  .  ?
  Ti1  C8d  2.88(4)  .  .  ?
  C1lf  H3lfc  2.89(4)  .  .  ?
  Ti2  C9f  2.89(2)  .  .  ?
  H2lac  H1ac  2.89(3)  .  '4 564'  ?
  C1f  H6f  2.89(3)  .  '2 575'  ?
  C5e  H2eb  2.89(3)  .  .  ?
  Li4  H1le  2.89(3)  .  .  ?
  H3lcc  H2lcc  2.89(4)  .  .  ?
  C3la  H2lac  2.89(4)  .  .  ?
  H2lec  H1ba  2.90(3)  .  '2 564'  ?
  C1le  H2lec  2.90(4)  .  .  ?
  C3la  H2laa  2.90(4)  .  .  ?
  C3e  Li2  2.90(3)  .  .  ?
  C5c  H2cb  2.90(3)  .  .  ?
  C3b  Li3  2.90(5)  .  .  ?
  C2b  C5b  2.90(4)  .  .  ?
  C2lc  H1ca  2.903(13)  .  '3 445'  ?
  C1lc  H1ca  2.90(2)  .  '3 445'  ?
  C9d  O1d  2.91(4)  .  .  ?
  O1c  H2cb  2.91(3)  .  .  ?
  O1c  C9c  2.91(4)  .  .  ?
  H2fa  H5d  2.9078(7)  .  '3 455'  ?
  C1lb  H2lbb  2.91(4)  .  .  ?
  O1a  C9a  2.91(4)  .  .  ?
  H3lec  H1da  2.91(3)  .  .  ?
  C3lf  H2lfb  2.91(4)  .  .  ?
  C1ld  H2ldc  2.91(4)  .  .  ?
  H1la  H2ab  2.91(2)  .  '4 564'  ?
  C9e  Li2  2.91(5)  .  .  ?
  O1a  O1f  2.92(3)  .  .  ?
  C3d  H1db  2.92(2)  .  .  ?
  C4d  C7d  2.92(4)  .  .  ?
  C6d  H7f  2.92(3)  .  '4 565'  ?
  C5c  H2da  2.92(2)  .  .  ?
  O1lc  C2lc  2.92(4)  .  .  ?
  O1lb  C2lb  2.92(4)  .  .  ?
  O1f  H1fb  2.93(2)  .  .  ?
  C5c  C2c  2.93(4)  .  .  ?
  H1fc  H6f  2.9257(4)  .  '2 575'  ?
  O2a  Li3  2.93(4)  .  .  ?
  C1e  H6e  2.93(4)  .  '2 574'  ?
  C3lf  H2lfa  2.93(2)  .  .  ?
  C9a  Li1  2.93(4)  .  .  ?
  C5d  H2da  2.93(3)  .  .  ?
  Li3  C3d  2.93(5)  .  .  ?
  H3lcb  H7b  2.94(3)  .  '2 565'  ?
  H3laa  H1eb  2.94(2)  .  .  ?
  C5e  C2e  2.94(5)  .  .  ?
  C3a  Li1  2.94(5)  .  .  ?
  O1c  O1e  2.95(3)  .  .  ?
  Li4  C1lf  2.95(4)  .  .  ?
  O1la  H5b  2.95(3)  .  '4 564'  ?
  H3lfc  H2lfb  2.95(3)  .  .  ?
  O2d  Li2  2.95(4)  .  .  ?
  H2lbb  H2cb  2.95(3)  .  '4 465'  ?
  H2cb  H5d  2.9531(6)  .  .  ?
  O2f  Li2  2.95(5)  .  .  ?
  O1d  H2da  2.95(3)  .  .  ?
  O1b  H2ba  2.96(3)  .  .  ?
  C1lc  H2lcc  2.96(4)  .  .  ?
  C1lf  H2lfb  2.96(4)  .  .  ?
  O1e  H2eb  2.963(11)  .  .  ?
  O3b  H7d  2.96(3)  .  '4 464'  ?
  H3laa  H5a  2.96(3)  .  '4 564'  ?
  C3e  H1eb  2.96(3)  .  .  ?
  C6d  H1cc  2.96(3)  .  .  ?
  H3lbb  H2lbb  2.97(4)  .  .  ?
  O1b  H2bb  2.97(3)  .  .  ?
  C2le  H1ea  2.97(3)  .  '3 445'  ?
  C9b  Li3  2.97(5)  .  .  ?
  O1a  H2ab  2.97(3)  .  .  ?
  O1f  H2fb  2.972(10)  .  .  ?
  H3ldc  H7b  2.974(14)  .  '3 545'  ?
  H3lbb  H1ld  2.98(2)  .  '2 565'  ?
  N1la  H2aa  2.98(2)  .  '4 564'  ?
  C6a  H2ca  2.98(3)  .  '4 465'  ?
  O2e  C3e  2.98(3)  .  .  ?
  C1lc  H3lcc  2.98(4)  .  .  ?
  C9e  O1e  2.98(5)  .  .  ?
  C1la  H3lac  2.99(4)  .  .  ?
  C2lf  H3lfc  2.99(3)  .  .  ?
  C3le  H3lcb  2.99(3)  .  '2 564'  ?
  O1d  H1db  2.99(2)  .  .  ?
  O1d  H2db  3.00(3)  .  .  ?
  C3c  O2c  3.00(4)  .  .  ?
  N1la  H2ab  3.00(3)  .  '4 564'  ?
  O2b  Li1  3.00(3)  .  .  ?
  O1lb  H2lbb  3.00(4)  .  .  ?
  Li3  O2c  3.00(4)  .  .  ?
  C1lf  H2lfa  3.00(3)  .  .  ?
  H3lfb  H2fa  3.00(3)  .  '3 545'  ?
  H2lab  H1lc  3.00(2)  .  '2 564'  ?
  N1lb  H2cb  3.00(3)  .  '4 465'  ?
  O2d  C3d  3.00(4)  .  .  ?
  C5a  H2bb  3.00(2)  .  .  ?
  H2lca  H1bc  3.01(3)  .  .  ?
  O2f  O3b  3.01(3)  .  .  ?
  O1lc  O1le  3.01(3)  .  .  ?
  Li4  H2lda  3.01(5)  .  .  ?
  O1la  H2ab  3.02(2)  .  '4 564'  ?
  C1ld  H1aa  3.02(2)  .  '3 545'  ?
  C3ld  H1aa  3.02(3)  .  '3 545'  ?
  O2a  C3a  3.02(4)  .  .  ?
  O1lf  H3lfc  3.02(4)  .  .  ?
  O1e  H1eb  3.02(2)  .  .  ?
  H2lcb  H2ea  3.02(3)  .  '3 445'  ?
  C6c  H2aa  3.02(2)  .  '4 564'  ?
  O2b  C3b  3.02(4)  .  .  ?
  O1e  H2ea  3.028(14)  .  .  ?
  H1lc  H3lcc  3.03(4)  .  .  ?
  C3c  H1cc  3.03(3)  .  .  ?
  H3ldc  H1ac  3.03(3)  .  '3 545'  ?
  C1lf  H1bb  3.04(3)  .  .  ?
  H1lf  H1ba  3.04(3)  .  .  ?
  H2lac  H2ab  3.04(3)  .  '4 564'  ?
  C1le  H3leb  3.04(4)  .  .  ?
  H3lab  H2lac  3.04(4)  .  .  ?
  C7e  H1fb  3.04(3)  .  .  ?
  O2f  C3f  3.04(3)  .  .  ?
  O2a  O3e  3.05(4)  .  .  ?
  H1ac  H6b  3.0503(6)  .  .  ?
  O3c  O2b  3.05(5)  .  .  ?
  H3lcc  H2lcb  3.054(17)  .  .  ?
  C3lb  H6b  3.06(3)  .  '4 565'  ?
  O1le  H1lf  3.06(4)  .  .  ?
  C3lb  H2lbb  3.06(4)  .  .  ?
  O2d  O3a  3.06(5)  .  .  ?
  H3lfb  H1fa  3.06(3)  .  '3 545'  ?
  H2fb  H2eb  3.0632(3)  .  .  ?
  O1lb  H6f  3.07(2)  .  '2 575'  ?
  C1ld  H3lda  3.07(4)  .  .  ?
  H1fa  H6d  3.0673(9)  .  '3 455'  ?
  C2la  H6d  3.07(3)  .  '4 464'  ?
  C2lc  H2ba  3.073(6)  .  .  ?
  O1a  H2aa  3.07(3)  .  .  ?
  H3leb  H1bb  3.07(3)  .  '2 564'  ?
  O3f  O2c  3.08(4)  .  .  ?
  C6f  H1fa  3.08(3)  .  '2 574'  ?
  H3lac  H2lac  3.08(4)  .  .  ?
  H3lab  H2ab  3.08(3)  .  '4 564'  ?
  H2lfc  H1bb  3.08(2)  .  .  ?
  C2la  H3laa  3.08(4)  .  .  ?
  H1lf  H2lfa  3.08(3)  .  .  ?
  O2e  O3d  3.08(3)  .  .  ?
  Li4  H1lf  3.08(3)  .  .  ?
  O1lc  O1lf  3.08(3)  .  .  ?
  C2le  H1bc  3.08(3)  .  '2 564'  ?
  H2lcb  H5e  3.09(3)  .  '3 445'  ?
  C1le  H1db  3.09(3)  .  .  ?
  H2ba  H2ea  3.0884(3)  .  '3 445'  ?
  H3lba  H7b  3.09(3)  .  '4 565'  ?
  C5d  H2cb  3.09(3)  .  .  ?
  H3lfa  H2lfb  3.09(4)  .  .  ?
  C3a  H1ac  3.09(3)  .  .  ?
  H1fb  H6e  3.0948(3)  .  .  ?
  O1b  O1d  3.10(5)  .  .  ?
  H2eb  H5f  3.0963(3)  .  .  ?
  H1eb  H7e  3.0973(7)  .  '2 574'  ?
  C1le  H3lea  3.10(3)  .  .  ?
  C6b  H1ac  3.10(3)  .  .  ?
  C3la  H2aa  3.10(3)  .  '4 564'  ?
  H7f  H7d  3.1048(7)  .  '4 464'  ?
  C1le  H2lea  3.11(4)  .  .  ?
  C1lf  H3lfa  3.11(4)  .  .  ?
  H2lca  H2leb  3.11(4)  .  .  ?
  H1la  H5b  3.11(4)  .  '4 564'  ?
  H1ld  H2lfb  3.11(3)  .  '2 564'  ?
  H2leb  H3lea  3.11(2)  .  .  ?
  C5f  H2eb  3.11(3)  .  .  ?
  C7f  H1fa  3.11(3)  .  '2 574'  ?
  C1ld  H2ldb  3.11(4)  .  .  ?
  C1lb  H3lbb  3.11(3)  .  .  ?
  O1ld  H1db  3.113(13)  .  .  ?
  C3le  H2leb  3.11(3)  .  .  ?
  C1lc  H2lcb  3.12(4)  .  .  ?
  C3lb  H1ac  3.12(3)  .  '4 565'  ?
  Li4  C1ld  3.12(5)  .  .  ?
  H3lfb  H1fc  3.12(3)  .  '3 545'  ?
  O1e  C9f  3.12(4)  .  .  ?
  H2aa  H6c  3.1218(8)  .  '4 465'  ?
  H2lac  H1cc  3.12(3)  .  '4 464'  ?
  Li4  C1lc  3.12(5)  .  .  ?
  H3lbc  H2ca  3.12(3)  .  '4 465'  ?
  C2lc  H3lcb  3.13(4)  .  .  ?
  O1f  C9e  3.13(4)  .  .  ?
  H2lba  H5c  3.13(3)  .  '4 465'  ?
  H2fa  H2db  3.1279(3)  .  '3 455'  ?
  H3lbc  H1cc  3.13(3)  .  '4 465'  ?
  O1le  H1bb  3.13(3)  .  .  ?
  H2ldc  H1ab  3.13(2)  .  '3 545'  ?
  C7a  H1ba  3.13(2)  .  .  ?
  C1lb  H5f  3.135(12)  .  '2 575'  ?
  H1lf  H2lfb  3.14(4)  .  .  ?
  H3laa  H6e  3.137(16)  .  '2 574'  ?
  H3lcb  H2lcb  3.14(3)  .  .  ?
  C2lb  H1fc  3.14(2)  .  .  ?
  H2leb  H1ec  3.14(3)  .  '3 445'  ?
  O1c  C9d  3.14(4)  .  .  ?
  H2bb  H2ab  3.1443(7)  .  .  ?
  O3d  H7b  3.15(3)  .  '4 565'  ?
  C3lc  H3lea  3.15(4)  .  '2 565'  ?
  H2ldb  H5f  3.15(3)  .  '3 545'  ?
  O1ld  O1lf  3.15(3)  .  .  ?
  O1lc  H1cb  3.15(2)  .  '3 445'  ?
  C3lf  H1fa  3.16(3)  .  '3 545'  ?
  H2lab  H7c  3.160(17)  .  .  ?
  C2le  H3lec  3.16(3)  .  .  ?
  H3lbc  H2cb  3.16(3)  .  '4 465'  ?
  C1ld  H2lfb  3.16(4)  .  '2 564'  ?
  C9e  H7e  3.17(3)  .  .  ?
  C7f  H1eb  3.17(3)  .  .  ?
  H1cc  H6d  3.1692(7)  .  .  ?
  H1ab  H7c  3.1695(3)  .  '4 465'  ?
  H1ec  H6e  3.1709(4)  .  '2 574'  ?
  C3la  H1ec  3.17(2)  .  .  ?
  C2ld  H2db  3.171(6)  .  .  ?
  C7c  H1da  3.17(2)  .  .  ?
  C8f  H6f  3.172(17)  .  .  ?
  C5b  H7b  3.17(3)  .  .  ?
  C3a  H1ab  3.18(3)  .  .  ?
  O1le  O1lf  3.18(4)  .  .  ?
  C3lf  H1dc  3.18(3)  .  '2 565'  ?
  C6f  H1eb  3.18(3)  .  .  ?
  H1la  H5a  3.18(2)  .  '4 564'  ?
  H2lba  H6f  3.179(16)  .  '2 575'  ?
  C8e  H7b  3.18(3)  .  '4 565'  ?
  C7d  H1cc  3.18(3)  .  .  ?
  O1a  O2f  3.18(5)  .  .  ?
  H3lca  H3lea  3.18(4)  .  '2 565'  ?
  C3lc  H1ca  3.18(3)  .  '3 445'  ?
  C2lb  H3lbc  3.18(4)  .  .  ?
  H3lca  H7b  3.19(3)  .  '2 565'  ?
  H7e  H7b  3.1859(5)  .  '4 565'  ?
  H1fb  H7e  3.1871(3)  .  .  ?
  C5e  H7e  3.19(3)  .  .  ?
  H2laa  H7f  3.19(3)  .  .  ?
  H2bb  H5a  3.1893(6)  .  .  ?
  C4f  Li1  3.19(3)  .  .  ?
  H1le  H3leb  3.19(4)  .  .  ?
  C1lc  H1cb  3.19(3)  .  '3 445'  ?
  C4b  H6b  3.19(3)  .  .  ?
  C3lc  H2lca  3.20(4)  .  .  ?
  O1c  H1cc  3.20(3)  .  .  ?
  H2lea  H3lec  3.20(4)  .  .  ?
  H1lc  H3leb  3.20(3)  .  '2 565'  ?
  O1e  O2c  3.20(2)  .  .  ?
  C6e  H1ea  3.20(3)  .  '2 575'  ?
  O1b  C9a  3.20(3)  .  .  ?
  C6a  H1ba  3.20(3)  .  .  ?
  C7f  H6d  3.20(3)  .  '4 464'  ?
  H2leb  H2ea  3.20(3)  .  '3 445'  ?
  C2lc  H1bc  3.20(2)  .  .  ?
  H2lea  H1bc  3.20(3)  .  '2 564'  ?
  H3lba  H2lbc  3.21(4)  .  .  ?
  C7c  H5c  3.21(3)  .  .  ?
  C5e  H1fb  3.21(4)  .  .  ?
  H3ldb  H2lfb  3.21(3)  .  '2 564'  ?
  H2lcb  H1bb  3.21(2)  .  .  ?
  C7d  H5d  3.21(3)  .  .  ?
  C5c  H7c  3.21(3)  .  .  ?
  H2lda  H1aa  3.210(6)  .  '3 545'  ?
  C2lb  H3lba  3.22(4)  .  .  ?
  C9f  H5f  3.220(16)  .  .  ?
  C4a  H6a  3.22(3)  .  .  ?
  H7a  H1ba  3.2208(4)  .  .  ?
  C4c  Li2  3.22(5)  .  .  ?
  C2lc  H1bb  3.22(2)  .  .  ?
  H1eb  H6f  3.2239(3)  .  .  ?
  C4e  H6e  3.22(3)  .  .  ?
  C3le  H1bc  3.23(2)  .  '2 564'  ?
  C8b  H6b  3.23(3)  .  .  ?
  C9d  H5d  3.23(3)  .  .  ?
  H3lcb  H3lec  3.23(4)  .  '2 565'  ?
  O2e  O1c  3.23(5)  .  .  ?
  H3ldb  H7d  3.23(3)  .  '2 564'  ?
  O2e  O1f  3.23(4)  .  .  ?
  C3c  H1cb  3.23(3)  .  .  ?
  C4c  H2da  3.232(16)  .  .  ?
  H3lfb  H2db  3.23(3)  .  .  ?
  O1la  H2eb  3.23(2)  .  '2 574'  ?
  H1lb  H5f  3.235(17)  .  '2 575'  ?
  O1ld  O1le  3.23(3)  .  .  ?
  C2lf  H1dc  3.24(2)  .  '2 565'  ?
  H2ldb  H3ldc  3.237(19)  .  .  ?
  C8d  H6d  3.24(3)  .  .  ?
  O1lb  H5c  3.24(2)  .  '4 465'  ?
  H1ld  H2lfa  3.24(4)  .  '2 564'  ?
  C7e  H5e  3.24(3)  .  .  ?
  C1la  H6e  3.240(18)  .  '2 574'  ?
  O1lc  H1bb  3.242(13)  .  .  ?
  N1la  H5a  3.24(3)  .  '4 564'  ?
  H2lec  H1ea  3.24(3)  .  '3 445'  ?
  H2lcc  H2ea  3.24(2)  .  '3 445'  ?
  C2le  H1le  3.25(4)  .  .  ?
  C8c  H6c  3.25(3)  .  .  ?
  H3laa  H2lab  3.25(4)  .  .  ?
  H3leb  H1ba  3.249(16)  .  '2 564'  ?
  C8a  H6a  3.25(3)  .  .  ?
  C1la  H2lab  3.25(3)  .  .  ?
  H2laa  H7d  3.25(3)  .  '4 464'  ?
  C7f  H5f  3.25(3)  .  .  ?
  O1lf  H1le  3.25(4)  .  .  ?
  H2ldc  H2fa  3.25(2)  .  '3 545'  ?
  C2ld  H3ldb  3.25(4)  .  .  ?
  C1lc  H3leb  3.25(4)  .  '2 565'  ?
  O1e  O2f  3.26(4)  .  .  ?
  H3lca  H2lca  3.26(4)  .  .  ?
  C9a  H5a  3.26(3)  .  .  ?
  C9b  H7b  3.26(3)  .  .  ?
  H3lfa  H1fc  3.26(2)  .  '3 545'  ?
  C2ld  H2fa  3.26(2)  .  '3 545'  ?
  C2lc  H1lc  3.26(4)  .  .  ?
  C3lf  H1lf  3.26(4)  .  .  ?
  O1a  C9b  3.26(4)  .  .  ?
  O1ld  H2ldc  3.27(4)  .  .  ?
  C7d  H7f  3.27(3)  .  '4 565'  ?
  Li4  H2lca  3.27(5)  .  .  ?
  C9c  H5c  3.27(3)  .  .  ?
  H1lb  H2cb  3.27(3)  .  '4 465'  ?
  C7e  H1ea  3.27(3)  .  '2 575'  ?
  N1lc  H3leb  3.27(4)  .  '2 565'  ?
  C4d  Li3  3.27(5)  .  .  ?
  C3ld  H2lda  3.27(4)  .  .  ?
  H2fb  H5e  3.2712(4)  .  .  ?
  N1lf  H1dc  3.27(3)  .  '2 565'  ?
  C8f  H7d  3.27(3)  .  '4 464'  ?
  C2ld  H1ld  3.27(4)  .  .  ?
  C2la  H2aa  3.27(3)  .  '4 564'  ?
  C8e  H6e  3.276(15)  .  .  ?
  C5f  H7f  3.28(3)  .  .  ?
  C2la  H1cc  3.28(3)  .  '4 464'  ?
  C1lc  H3lca  3.28(4)  .  .  ?
  H2ldb  H1db  3.28(2)  .  .  ?
  O1ld  H1ab  3.28(2)  .  '3 545'  ?
  C9c  H7c  3.28(3)  .  .  ?
  C4a  H2bb  3.282(17)  .  .  ?
  C5f  H1eb  3.28(4)  .  .  ?
  C3lb  H2lba  3.28(4)  .  .  ?
  H3lac  H1ec  3.28(2)  .  .  ?
  H2cb  H2da  3.2842(7)  .  .  ?
  O1a  H1ac  3.28(3)  .  .  ?
  H1fb  H7f  3.2866(8)  .  '2 575'  ?
  H2lbb  H6c  3.29(3)  .  '4 465'  ?
  O1le  H2ba  3.29(3)  .  .  ?
  C9a  H7a  3.29(3)  .  .  ?
  C5a  H7a  3.29(3)  .  .  ?
  H3lbb  H2lba  3.29(3)  .  .  ?
  O2b  O1d  3.29(4)  .  .  ?
  H1ld  H3lda  3.29(4)  .  .  ?
  H2ldc  H3lfb  3.30(3)  .  .  ?
  C3e  H1ea  3.30(3)  .  .  ?
  H3lbb  H7a  3.297(14)  .  .  ?
  H3lba  H7e  3.30(3)  .  .  ?
  C2ld  H1db  3.30(2)  .  .  ?
  C7a  H5a  3.30(3)  .  .  ?
  C7b  H5b  3.30(3)  .  .  ?
  C1lb  H2lbc  3.31(4)  .  .  ?
  C6e  H1eb  3.31(3)  .  '2 575'  ?
  H1la  H3lac  3.31(4)  .  .  ?
  O1d  C9c  3.31(3)  .  .  ?
  O1le  H2lec  3.31(4)  .  .  ?
  H3lbc  H2lbc  3.31(4)  .  .  ?
  O1la  C3la  3.31(4)  .  .  ?
  H1lc  H1ca  3.31(3)  .  '3 445'  ?
  N1lb  H2ca  3.31(2)  .  '4 465'  ?
  C2ld  H3lfb  3.31(4)  .  .  ?
  C3f  H1fa  3.31(3)  .  .  ?
  C5d  H7d  3.31(3)  .  .  ?
  O2a  O1f  3.32(2)  .  .  ?
  C7e  H7b  3.32(3)  .  '4 565'  ?
  C1la  H5b  3.32(3)  .  '4 564'  ?
  H3lfc  H1fc  3.32(3)  .  '3 545'  ?
  C6b  H7e  3.32(3)  .  '4 464'  ?
  C4e  Li2  3.32(3)  .  .  ?
  H2lca  H1ca  3.319(7)  .  '3 445'  ?
  C2ld  O1lf  3.32(4)  .  .  ?
  C1le  H1lf  3.32(4)  .  .  ?
  C4b  H2ab  3.32(3)  .  .  ?
  C8c  H1da  3.325(17)  .  .  ?
  C2la  H1la  3.33(3)  .  .  ?
  H2lfb  H1da  3.326(17)  .  '2 565'  ?
  C1e  H7e  3.33(2)  .  '2 574'  ?
  H2leb  H6a  3.328(15)  .  '2 564'  ?
  H2leb  H2ba  3.33(3)  .  .  ?
  C9f  H7f  3.33(3)  .  .  ?
  O1d  O2c  3.33(2)  .  .  ?
  H3lac  H7f  3.33(3)  .  .  ?
  C9e  H5e  3.334(14)  .  .  ?
  C9b  H5b  3.33(3)  .  .  ?
  O2a  O1b  3.34(2)  .  .  ?
  C1lf  H1le  3.34(4)  .  .  ?
  O1b  O2d  3.34(4)  .  .  ?
  C6b  H2ab  3.34(3)  .  .  ?
  C4c  H6c  3.34(3)  .  .  ?
  Ti1  Li1  3.34(4)  .  .  ?
  H3lfc  H1fa  3.35(3)  .  '3 545'  ?
  O2d  O2c  3.35(4)  .  .  ?
  H3lcc  H1cc  3.35(3)  .  '3 445'  ?
  C2lf  H3ldb  3.35(3)  .  '2 565'  ?
  N1ld  H2lfb  3.35(4)  .  '2 564'  ?
  O2e  O2f  3.35(4)  .  .  ?
  H2lab  H6d  3.35(3)  .  '4 464'  ?
  O1la  H6b  3.35(3)  .  '4 564'  ?
  C3d  H1dc  3.35(3)  .  .  ?
  C9d  H7d  3.35(3)  .  .  ?
  C4f  H6f  3.36(3)  .  .  ?
  C1f  H7f  3.36(2)  .  '2 575'  ?
  C4b  Li3  3.36(5)  .  .  ?
  C3b  C4a  3.36(4)  .  .  ?
  C5e  H2fb  3.36(3)  .  .  ?
  O1lc  O1ld  3.36(5)  .  .  ?
  C1ld  H1ab  3.36(3)  .  '3 545'  ?
  O1lc  H1ca  3.37(2)  .  '3 445'  ?
  H3lcb  H7d  3.365(8)  .  '3 445'  ?
  C3lc  H7b  3.37(3)  .  '2 565'  ?
  C1le  H1da  3.37(3)  .  .  ?
  C6c  H2da  3.37(3)  .  .  ?
  C1lc  H1cc  3.367(16)  .  '3 445'  ?
  Ti1  Li3  3.37(4)  .  .  ?
  H1lf  H3lfb  3.37(4)  .  .  ?
  C1ld  H1db  3.370(4)  .  .  ?
  C2lb  H2ca  3.37(3)  .  '4 465'  ?
  C3lf  H2lfc  3.37(4)  .  .  ?
  O2a  O2b  3.38(4)  .  .  ?
  H1lc  H1cc  3.38(2)  .  '3 445'  ?
  H3lfb  H6c  3.381(17)  .  '2 565'  ?
  C2la  H1ab  3.38(3)  .  '4 564'  ?
  C4a  Li1  3.38(5)  .  .  ?
  C2lf  H3lfb  3.38(4)  .  .  ?
  O1lf  H1db  3.38(3)  .  .  ?
  C7b  H1ac  3.39(3)  .  .  ?
  C3lb  H1cb  3.39(3)  .  '4 465'  ?
  H2lbc  H1fc  3.39(2)  .  .  ?
  C3c  C4d  3.39(4)  .  .  ?
  O2d  O1c  3.39(4)  .  .  ?
  H3lfa  H6f  3.39(3)  .  '4 565'  ?
  C3b  C9a  3.39(3)  .  .  ?
  C3b  H1bc  3.39(3)  .  .  ?
  H3lea  H7b  3.39(2)  .  .  ?
  C1ld  H1ac  3.393(17)  .  '3 545'  ?
  O1lc  H2lcc  3.39(4)  .  .  ?
  C4f  C3e  3.39(5)  .  .  ?
  H3leb  H1da  3.40(3)  .  .  ?
  C7e  H6b  3.40(3)  .  '4 565'  ?
  H1cc  H7d  3.3967(3)  .  .  ?
  H3lfc  H2lfa  3.398(18)  .  .  ?
  H3laa  H1ea  3.40(2)  .  .  ?
  C3lc  H3leb  3.40(3)  .  '2 565'  ?
  H1le  H3lea  3.40(4)  .  .  ?
  C1la  H2aa  3.401(16)  .  '4 564'  ?
  N1ld  H1db  3.401(12)  .  .  ?
  H1lc  H2lca  3.40(3)  .  .  ?
  C3a  C4b  3.40(4)  .  .  ?
  O1a  O2b  3.40(4)  .  .  ?
  C5c  H2aa  3.41(3)  .  '4 564'  ?
  H2lab  H1cc  3.41(3)  .  '4 464'  ?
  H2ldb  H3lfb  3.41(4)  .  .  ?
  C3f  C4e  3.41(4)  .  .  ?
  C5a  H2ca  3.41(3)  .  '4 465'  ?
  H3lfa  H7f  3.41(3)  .  '4 565'  ?
  C2lf  H1ba  3.41(3)  .  .  ?
  H1le  H2leb  3.41(4)  .  .  ?
  C4d  H6d  3.41(3)  .  .  ?
  H2lba  H7e  3.42(3)  .  .  ?
  H1ld  H1aa  3.42(3)  .  '3 545'  ?
  H1lb  H3lbb  3.42(4)  .  .  ?
  H2lfc  H7a  3.42(3)  .  .  ?
  C4f  H2eb  3.42(3)  .  .  ?
  C3lf  H1fc  3.42(3)  .  '3 545'  ?
  C6a  H2bb  3.42(3)  .  .  ?
  H1ld  H1ac  3.42(2)  .  '3 545'  ?
  H1ea  H6b  3.4246(9)  .  3  ?
  H5e  H5b  3.4269(5)  .  3  ?
  H3lda  H7d  3.43(3)  .  '2 564'  ?
  H1ab  H6c  3.4272(4)  .  '4 465'  ?
  C9e  Li1  3.43(4)  .  .  ?
  H2ldb  H3ldb  3.43(3)  .  .  ?
  H3lbc  H2lbb  3.43(4)  .  .  ?
  H2lab  H7d  3.43(4)  .  '4 464'  ?
  H2lba  H1fa  3.43(2)  .  .  ?
  C5b  H2ea  3.43(2)  .  '3 445'  ?
  H2lda  H3lda  3.43(4)  .  .  ?
  H2lea  H6e  3.43(3)  .  '4 464'  ?
  C3le  H1da  3.43(3)  .  .  ?
  N1le  H1bc  3.44(3)  .  '2 564'  ?
  C3ld  H2lfa  3.44(4)  .  '2 564'  ?
  C2lb  H1lb  3.44(4)  .  .  ?
  Ti1  Li2  3.44(5)  .  .  ?
  H3lcc  H7b  3.44(3)  .  '2 565'  ?
  C7a  H2ca  3.44(3)  .  '4 465'  ?
  O1ld  H1aa  3.44(2)  .  '3 545'  ?
  C7c  H2aa  3.44(3)  .  '4 564'  ?
  H2lab  H2aa  3.45(4)  .  '4 564'  ?
  Li2  Li1  3.45(5)  .  .  ?
  H1ld  H2lda  3.45(3)  .  .  ?
  O1f  C4e  3.45(4)  .  .  ?
  C9d  Li2  3.45(4)  .  .  ?
  C6c  H1da  3.45(3)  .  .  ?
  C2lc  H2ea  3.45(2)  .  '3 445'  ?
  C1la  H5a  3.45(3)  .  '4 564'  ?
  O1la  H3laa  3.45(4)  .  .  ?
  H3lea  H1bc  3.45(2)  .  '2 564'  ?
  H3lfa  H6d  3.45(2)  .  .  ?
  C8e  O3d  3.46(3)  .  .  ?
  O1e  C4f  3.46(4)  .  .  ?
  C1lc  H1bb  3.457(4)  .  .  ?
  H2lda  H2fa  3.46(3)  .  '3 545'  ?
  H2lbb  H1fc  3.46(2)  .  .  ?
  O1lb  H2db  3.46(3)  .  '4 465'  ?
  C5d  H1cc  3.46(2)  .  .  ?
  H1lb  H2fb  3.46(2)  .  '2 575'  ?
  O1ld  C3ld  3.46(4)  .  .  ?
  C4c  C3d  3.47(3)  .  .  ?
  H3lfa  H1dc  3.47(3)  .  '2 565'  ?
  C3lf  H6c  3.468(10)  .  '2 565'  ?
  H3lbb  H1ac  3.47(3)  .  '4 565'  ?
  H3lab  H2laa  3.47(4)  .  .  ?
  N1lb  H7e  3.47(3)  .  .  ?
  H3lfa  H5d  3.47(3)  .  .  ?
  H2lfb  H1ba  3.47(3)  .  .  ?
  C1lf  H2lda  3.47(4)  .  .  ?
  H3lbc  H1ld  3.47(3)  .  '2 565'  ?
  H2lcc  H2leb  3.47(4)  .  .  ?
  C2lb  H2cb  3.47(3)  .  '4 465'  ?
  C4d  H2cb  3.47(3)  .  .  ?
  H1cb  H6a  3.4736(4)  .  '4 564'  ?
  H3lfa  H2fa  3.47(3)  .  '3 545'  ?
  H2lbc  H5c  3.48(3)  .  '4 465'  ?
  N1lc  H1bc  3.477(11)  .  .  ?
  C7f  H7d  3.48(2)  .  '4 464'  ?
  H2lcc  H1cb  3.48(2)  .  '3 445'  ?
  C1lb  H5d  3.48(3)  .  '4 465'  ?
  H3ldb  H7b  3.479(7)  .  '3 545'  ?
  Ti2  Li1  3.48(5)  .  .  ?
  Li4  H1db  3.48(4)  .  .  ?
  H3lbb  H6b  3.48(3)  .  '4 565'  ?
  O1le  C1lf  3.48(4)  .  .  ?
  O1a  H1ab  3.48(3)  .  .  ?
  C6d  H2cb  3.49(3)  .  .  ?
  H3lbc  H1ab  3.49(3)  .  '4 565'  ?
  H2lfb  H7a  3.49(3)  .  .  ?
  C3la  H2ab  3.49(3)  .  '4 564'  ?
  H1lb  H2eb  3.49(2)  .  '2 575'  ?
  O1a  C4b  3.49(2)  .  .  ?
  C8a  O3e  3.50(3)  .  .  ?
  C8e  H1fb  3.50(2)  .  .  ?
  C8a  H1ba  3.497(16)  .  .  ?
  C2lc  O1le  3.50(4)  .  .  ?
  O1lf  H3lfa  3.50(4)  .  .  ?
  H2ca  H5a  3.5024(3)  .  '4 564'  ?
  H2ab  H6b  3.5058(4)  .  .  ?
  C8f  O3b  3.51(3)  .  .  ?
  O1c  H1cb  3.51(3)  .  .  ?
  Ti2  Li2  3.51(4)  .  .  ?
  C5b  H1ac  3.51(2)  .  .  ?
  O2a  C7a  3.51(4)  .  .  ?
  H1lb  H6b  3.51(3)  .  '4 565'  ?
  C2e  H5b  3.51(2)  .  3  ?
  O2e  O2c  3.51(4)  .  .  ?
  H2ldb  H1dc  3.51(2)  .  .  ?
  N1lb  H5c  3.52(3)  .  '4 465'  ?
  O3f  C8c  3.52(3)  .  .  ?
  N1lc  H1cb  3.52(3)  .  '3 445'  ?
  O1lf  H2db  3.52(3)  .  .  ?
  H3lda  H1aa  3.52(3)  .  '3 545'  ?
  C3lc  H7d  3.519(9)  .  '3 445'  ?
  H5f  H5d  3.5203(5)  .  '3 455'  ?
  N1lc  H1bb  3.520(12)  .  .  ?
  N1lc  H1cc  3.521(17)  .  '3 445'  ?
  C2la  H2ab  3.52(3)  .  '4 564'  ?
  C2lf  H1ld  3.52(4)  .  '2 565'  ?
  C2le  H6a  3.525(8)  .  '2 564'  ?
  C3lb  H2ca  3.53(3)  .  '4 465'  ?
  O1lf  C2lf  3.53(3)  .  .  ?
  O1c  C4d  3.53(2)  .  .  ?
  C4e  H2fb  3.53(3)  .  .  ?
  H3laa  H2laa  3.53(4)  .  .  ?
  C2c  H6a  3.53(3)  .  '4 564'  ?
  C9d  C3c  3.53(5)  .  .  ?
  H2leb  H3leb  3.54(4)  .  .  ?
  H1lc  H1cb  3.54(3)  .  '3 445'  ?
  C4b  O3b  3.54(4)  .  .  ?
  H1lc  H3lca  3.54(4)  .  .  ?
  H1fb  H5e  3.5430(3)  .  .  ?
  H2fb  H5d  3.5432(5)  .  '3 455'  ?
  H2lea  H1ec  3.54(2)  .  '3 445'  ?
  H2lca  H2ea  3.55(3)  .  '3 445'  ?
  H3lfc  H1da  3.55(3)  .  '2 565'  ?
  H2lac  H1cb  3.55(3)  .  '4 464'  ?
  H1da  H7c  3.5503(5)  .  .  ?
  O1la  H2ea  3.55(2)  .  '2 574'  ?
  H2lbc  H7e  3.55(3)  .  .  ?
  H3lab  H1ec  3.55(2)  .  .  ?
  O1ld  H2ldb  3.55(4)  .  .  ?
  Ti2  Li3  3.55(4)  .  .  ?
  O3f  C7d  3.56(4)  .  '4 464'  ?
  C5d  H2fa  3.556(19)  .  '3 545'  ?
  O1lb  H2fb  3.56(3)  .  '2 575'  ?
  H2eb  H5b  3.5580(5)  .  3  ?
  C3lb  H1ld  3.56(2)  .  '2 565'  ?
  C5c  H5a  3.56(2)  .  '4 564'  ?
  O1e  H1ea  3.56(2)  .  .  ?
  C3e  C9f  3.56(4)  .  .  ?
  O1e  C8f  3.56(4)  .  .  ?
  H1la  H2lac  3.56(3)  .  .  ?
  O3f  C9c  3.56(4)  .  .  ?
  O2f  C7f  3.56(4)  .  .  ?
  O2b  C7b  3.56(4)  .  .  ?
  H3lca  H3leb  3.57(4)  .  '2 565'  ?
  H2ldb  H1aa  3.567(15)  .  '3 545'  ?
  O1lf  H2lfc  3.57(3)  .  .  ?
  H2aa  H7c  3.5709(6)  .  '4 465'  ?
  H3lab  H6a  3.57(3)  .  '4 564'  ?
  C1la  H2bb  3.57(3)  .  '4 564'  ?
  N1le  H1da  3.57(3)  .  .  ?
  C8f  H1eb  3.57(3)  .  .  ?
  C1le  H2lca  3.57(4)  .  .  ?
  C6d  H1fa  3.57(2)  .  '3 545'  ?
  C9a  Li3  3.57(5)  .  .  ?
  O1lb  C3lb  3.57(3)  .  .  ?
  H2lac  H7c  3.575(18)  .  .  ?
  C3lb  H2cb  3.58(3)  .  '4 465'  ?
  H1lb  H5d  3.58(3)  .  '4 465'  ?
  H2lab  H1ab  3.58(3)  .  '4 564'  ?
  C7e  H1eb  3.58(3)  .  '2 575'  ?
  C2f  H5d  3.58(2)  .  '3 455'  ?
  N1ld  H1ac  3.579(17)  .  '3 545'  ?
  O1lf  H1bb  3.58(3)  .  .  ?
  O2e  C9d  3.58(2)  .  .  ?
  H3lbb  H2ca  3.58(3)  .  '4 465'  ?
  H6a  H1ba  3.5850(4)  .  .  ?
  O1f  C5f  3.59(4)  .  .  ?
  O1a  C8b  3.59(4)  .  .  ?
  O1le  H1db  3.59(3)  .  .  ?
  H3lcb  H2lcc  3.59(4)  .  .  ?
  C8d  O1c  3.59(4)  .  .  ?
  H2db  H5f  3.5887(4)  .  '3 545'  ?
  H1ea  H5b  3.5887(5)  .  3  ?
  N1ld  H1ab  3.59(3)  .  '3 545'  ?
  O2f  C9b  3.59(2)  .  .  ?
  C9e  C3f  3.59(4)  .  .  ?
  O1la  H2fb  3.59(2)  .  '2 574'  ?
  O3f  H6d  3.59(3)  .  '4 464'  ?
  H3lfb  H5d  3.59(2)  .  .  ?
  Li3  Li2  3.60(4)  .  .  ?
  C3f  C3e  3.60(5)  .  .  ?
  H2lac  H1lc  3.60(3)  .  '2 564'  ?
  H1cb  H7a  3.5969(4)  .  '4 564'  ?
  O3c  C8b  3.60(5)  .  .  ?
  N1lb  H6b  3.60(3)  .  '4 565'  ?
  O3e  C6e  3.598(18)  .  .  ?
  Li4  H1bb  3.60(4)  .  .  ?
  H1eb  H7f  3.5988(3)  .  .  ?
  C6f  H1fb  3.60(3)  .  '2 574'  ?
  C4e  H1fb  3.60(3)  .  .  ?
  O2a  C9e  3.60(3)  .  .  ?
  O1lf  H2ldc  3.60(4)  .  .  ?
  H1lc  H3lec  3.61(4)  .  '2 565'  ?
  C7c  H1ab  3.61(3)  .  '4 564'  ?
  H2da  H6c  3.6076(4)  .  .  ?
  O2d  C7d  3.61(4)  .  .  ?
  H3lbc  H6b  3.61(3)  .  '4 565'  ?
  H2ba  H5e  3.6090(4)  .  '3 445'  ?
  H1la  H2laa  3.61(4)  .  .  ?
  C8e  O1f  3.61(4)  .  .  ?
  O3d  C9e  3.61(3)  .  .  ?
  C7b  O3e  3.61(4)  .  '4 464'  ?
  O1le  C3le  3.61(3)  .  .  ?
  C4a  O3a  3.61(4)  .  .  ?
  C8d  H5d  3.61(3)  .  .  ?
  C6b  O3b  3.61(4)  .  .  ?
  C6c  H1ab  3.61(3)  .  '4 564'  ?
  O2e  C7e  3.61(4)  .  .  ?
  C1ld  H2lfa  3.62(4)  .  '2 564'  ?
  C4e  O3e  3.62(4)  .  .  ?
  C9c  C3d  3.62(3)  .  .  ?
  O2f  C8b  3.62(3)  .  .  ?
  H1dc  H6c  3.6197(7)  .  .  ?
  O2b  O2d  3.62(4)  .  .  ?
  O2a  O2f  3.62(4)  .  .  ?
  O2d  C5d  3.62(4)  .  .  ?
  C2ld  H1ab  3.62(2)  .  '3 545'  ?
  H3lac  H5a  3.62(3)  .  '4 564'  ?
  O1d  C5d  3.62(4)  .  .  ?
  C1e  C6e  3.63(4)  .  '2 574'  ?
  H2ldc  H3ldb  3.63(4)  .  .  ?
  C9f  Li2  3.63(4)  .  .  ?
  C2a  C5b  3.63(4)  .  .  ?
  H2lec  H3lec  3.63(2)  .  .  ?
  H3lbb  H7b  3.63(3)  .  '4 565'  ?
  O1b  C8a  3.63(4)  .  .  ?
  H3lbb  H1cb  3.63(3)  .  '4 465'  ?
  C7b  H7e  3.63(3)  .  '4 464'  ?
  O3c  C4c  3.63(4)  .  .  ?
  C2le  H1ec  3.63(3)  .  '3 445'  ?
  O1c  C5c  3.63(4)  .  .  ?
  Li3  Li1  3.63(3)  .  .  ?
  C3lf  H2lda  3.63(4)  .  .  ?
  O3f  C4f  3.63(4)  .  .  ?
  H2lec  H1ec  3.63(3)  .  '3 445'  ?
  C4b  H7b  3.63(3)  .  .  ?
  C1le  H2ba  3.63(3)  .  .  ?
  H2ea  H6b  3.6336(9)  .  3  ?
  O1b  C4a  3.64(4)  .  .  ?
  H2lcc  H2ba  3.637(8)  .  .  ?
  O1d  C8c  3.64(4)  .  .  ?
  O1lb  H2fa  3.64(2)  .  '2 575'  ?
  C6a  O3a  3.64(5)  .  .  ?
  C9b  Li1  3.65(3)  .  .  ?
  O1a  C5a  3.65(4)  .  .  ?
  C3a  C9b  3.65(5)  .  .  ?
  O3b  C9f  3.65(3)  .  .  ?
  N1la  H7f  3.65(3)  .  .  ?
  C5a  H1ba  3.65(2)  .  .  ?
  O1b  C5b  3.65(4)  .  .  ?
  O1f  H1fa  3.65(2)  .  .  ?
  O1ld  H3ldb  3.65(4)  .  .  ?
  C4e  H7e  3.66(4)  .  .  ?
  C8d  O3a  3.66(5)  .  .  ?
  O1le  H2lea  3.66(4)  .  .  ?
  O2c  C9f  3.66(3)  .  .  ?
  O1e  C5e  3.66(4)  .  .  ?
  O1ld  H2lfb  3.66(4)  .  '2 564'  ?
  C3ld  H7b  3.663(9)  .  '3 545'  ?
  C3lf  H2fa  3.67(3)  .  '3 545'  ?
  O3d  C6d  3.67(4)  .  .  ?
  O2a  C5a  3.67(4)  .  .  ?
  N1ld  H2lfa  3.67(4)  .  '2 564'  ?
  O3d  C4d  3.67(4)  .  .  ?
  C4c  C4d  3.68(4)  .  .  ?
  C2la  H1lc  3.68(2)  .  '2 564'  ?
  C2lb  H7e  3.68(3)  .  .  ?
  C1le  O1lf  3.68(4)  .  .  ?
  C9b  H6b  3.68(3)  .  .  ?
  C6c  H1dc  3.68(2)  .  .  ?
  O3c  C6c  3.68(5)  .  .  ?
  C2lb  H1fb  3.68(2)  .  .  ?
  O1d  H1dc  3.68(3)  .  .  ?
  C1lf  H1ba  3.68(3)  .  .  ?
  C3lc  C3le  3.68(4)  .  '2 565'  ?
  C5c  C2d  3.68(4)  .  .  ?
  O1lc  H2lcb  3.69(4)  .  .  ?
  C4b  C4a  3.69(4)  .  .  ?
  O1ld  H1le  3.687(16)  .  .  ?
  C8f  H5f  3.69(2)  .  .  ?
  O2b  C9c  3.69(5)  .  .  ?
  N1lc  H3lea  3.69(4)  .  '2 565'  ?
  C7c  O2c  3.69(4)  .  .  ?
  C2lc  H2leb  3.69(4)  .  .  ?
  O2f  C5f  3.69(2)  .  .  ?
  O1d  C4c  3.69(4)  .  .  ?
  C3ld  H7d  3.69(3)  .  '2 564'  ?
  O1ld  C1le  3.70(2)  .  .  ?
  C1lb  H2ca  3.696(18)  .  '4 465'  ?
  Li4  H7a  3.70(4)  .  '2 564'  ?
  C8c  H5c  3.70(3)  .  .  ?
  C2le  H1ba  3.70(3)  .  '2 564'  ?
  C3ld  H2lfb  3.70(3)  .  '2 564'  ?
  O3f  C6f  3.70(2)  .  .  ?
  Ti2  H7d  3.70(3)  .  '4 464'  ?
  C9a  O3e  3.70(4)  .  .  ?
  O1la  H1ac  3.70(2)  .  '4 564'  ?
  C9a  H6a  3.71(3)  .  .  ?
  C2a  H6c  3.71(2)  .  '4 465'  ?
  O1lf  H7c  3.71(2)  .  '2 565'  ?
  C2la  H7f  3.71(3)  .  .  ?
  C5a  C2b  3.71(4)  .  .  ?
  O2e  C5e  3.71(2)  .  .  ?
  C5d  C2c  3.71(4)  .  .  ?
  C5c  O2c  3.71(5)  .  .  ?
  C5f  C2e  3.71(5)  .  .  ?
  C1lb  H5c  3.71(3)  .  '4 465'  ?
  O1la  H2lab  3.72(4)  .  .  ?
  O3c  C9b  3.72(5)  .  .  ?
  C9e  H6e  3.72(2)  .  .  ?
  C3ld  H1ac  3.72(3)  .  '3 545'  ?
  C3la  H1eb  3.72(2)  .  .  ?
  C8a  H5a  3.72(3)  .  .  ?
  C3le  H1lc  3.72(4)  .  '2 564'  ?
  O2d  C9a  3.73(5)  .  .  ?
  C3lb  H7e  3.73(2)  .  .  ?
  C3a  C6a  3.73(4)  .  .  ?
  O3e  H6b  3.73(3)  .  '4 565'  ?
  C3c  H2da  3.729(15)  .  .  ?
  C9f  H6f  3.73(2)  .  .  ?
  C4a  H7a  3.73(3)  .  .  ?
  C6b  H1ea  3.73(2)  .  '3 445'  ?
  C9c  Li3  3.73(5)  .  .  ?
  O2a  C8e  3.73(3)  .  .  ?
  O1lc  C1lf  3.73(2)  .  .  ?
  C3c  C3d  3.73(3)  .  .  ?
  Li4  H1lc  3.74(5)  .  .  ?
  C2c  H5d  3.74(2)  .  .  ?
  C1lb  H6f  3.74(2)  .  '2 575'  ?
  C9e  H1fb  3.74(3)  .  .  ?
  C8e  H5e  3.74(2)  .  .  ?
  C1f  C6e  3.74(5)  .  .  ?
  H3lbb  C1ld  3.74(2)  .  '2 565'  ?
  O1lc  C3lc  3.74(4)  .  .  ?
  O1la  H3lab  3.74(4)  .  .  ?
  O1lb  H3lbc  3.74(3)  .  .  ?
  C3b  C6b  3.74(4)  .  .  ?
  N1le  H1db  3.74(3)  .  .  ?
  O2b  C5b  3.75(4)  .  .  ?
  C1f  C6f  3.75(5)  .  '2 575'  ?
  C9d  O3a  3.75(5)  .  .  ?
  Li4  H1ld  3.75(5)  .  .  ?
  C8f  H6d  3.75(3)  .  '4 464'  ?
  C8d  C3d  3.75(4)  .  .  ?
  O1lc  H1ab  3.76(2)  .  '3 545'  ?
  C3f  C6f  3.76(5)  .  .  ?
  C3c  C5d  3.76(3)  .  .  ?
  O1a  C3f  3.76(3)  .  .  ?
  C1lf  H2db  3.76(3)  .  .  ?
  C3b  C3a  3.76(3)  .  .  ?
  C2d  H5c  3.76(3)  .  .  ?
  C6e  H2fb  3.76(3)  .  .  ?
  C7f  C6d  3.76(4)  .  '4 464'  ?
  O1le  H2lcc  3.76(4)  .  .  ?
  O1ld  H3ldc  3.76(4)  .  .  ?
  N1la  H6d  3.76(3)  .  '4 464'  ?
  C1c  H6a  3.76(4)  .  '4 564'  ?
  C7f  H1fb  3.77(2)  .  '2 574'  ?
  O1ld  H1ac  3.766(14)  .  '3 545'  ?
  O2e  C8d  3.77(3)  .  .  ?
  C3f  H2eb  3.77(3)  .  .  ?
  C6b  C1a  3.77(4)  .  .  ?
  C1lb  H1cc  3.77(2)  .  '4 465'  ?
  C3e  C6e  3.77(5)  .  .  ?
  C2la  H1ac  3.77(3)  .  '4 564'  ?
  C9c  H6c  3.77(3)  .  .  ?
  H2lab  C1lc  3.78(2)  .  '2 564'  ?
  C3la  H7f  3.78(3)  .  .  ?
  C2b  C4a  3.78(3)  .  .  ?
  C2lf  H1bb  3.78(3)  .  .  ?
  C8a  C3a  3.79(4)  .  .  ?
  C1ld  C2lf  3.79(4)  .  '2 564'  ?
  Li4  C2ld  3.79(5)  .  .  ?
  C2a  C6c  3.79(4)  .  '4 465'  ?
  C2a  H5b  3.79(2)  .  .  ?
  C4c  H7c  3.79(3)  .  .  ?
  O1la  H6e  3.79(2)  .  '2 574'  ?
  C8d  H1cc  3.79(3)  .  .  ?
  C4c  C2d  3.79(2)  .  .  ?
  C8e  C3e  3.79(5)  .  .  ?
  C3d  C6d  3.79(4)  .  .  ?
  O1f  H5f  3.79(2)  .  .  ?
  C2f  H2eb  3.79(4)  .  .  ?
  C3lb  H7b  3.79(3)  .  '4 565'  ?
  O2a  C3b  3.79(3)  .  .  ?
  C2f  C9f  3.79(4)  .  .  ?
  C8b  H5b  3.79(3)  .  .  ?
  C8f  O2c  3.79(3)  .  .  ?
  C2la  H7d  3.79(3)  .  '4 464'  ?
  C2lf  H1db  3.80(3)  .  '2 565'  ?
  O2d  C8a  3.80(5)  .  .  ?
  C2la  H7c  3.800(15)  .  .  ?
  O1b  H1bc  3.80(3)  .  .  ?
  C3a  C5b  3.80(3)  .  .  ?
  C5a  H5c  3.81(2)  .  '4 465'  ?
  O1lf  H2ldb  3.81(4)  .  .  ?
  O1lc  H1cc  3.810(14)  .  '3 445'  ?
  C6f  H2eb  3.81(3)  .  .  ?
  C4f  C4e  3.81(5)  .  .  ?
  O2b  C8c  3.81(5)  .  .  ?
  C7a  H1cb  3.81(4)  .  '4 465'  ?
  O1le  H3lec  3.81(3)  .  .  ?
  C2lf  H7a  3.81(3)  .  .  ?
  Li4  H7c  3.81(4)  .  '2 565'  ?
  C9d  H6d  3.82(3)  .  .  ?
  N1le  H1ba  3.82(3)  .  '2 564'  ?
  C3e  H2fb  3.82(3)  .  .  ?
  C3le  H3lca  3.82(4)  .  '2 564'  ?
  C4f  H7f  3.82(4)  .  .  ?
  O2c  Li1  3.82(5)  .  .  ?
  C9c  H1da  3.820(13)  .  .  ?
  C7e  C1e  3.82(4)  .  '2 575'  ?
  C6b  C7e  3.83(5)  .  '4 464'  ?
  C7d  C7f  3.83(4)  .  '4 565'  ?
  C5c  H1da  3.83(2)  .  .  ?
  C4f  H1eb  3.83(3)  .  .  ?
  O1c  H5c  3.83(3)  .  .  ?
  O1lb  H2lbc  3.83(4)  .  .  ?
  C4f  C2e  3.83(4)  .  .  ?
  N1lb  H1cb  3.83(2)  .  '4 465'  ?
  C3c  C6c  3.83(4)  .  .  ?
  N1ld  H1dc  3.833(12)  .  .  ?
  C1le  H1bb  3.83(3)  .  .  ?
  C4d  C1d  3.83(4)  .  .  ?
  Li4  H1cb  3.83(2)  .  '3 445'  ?
  C4b  C2a  3.83(4)  .  .  ?
  C3b  C5a  3.84(5)  .  .  ?
  C9a  H1ba  3.838(11)  .  .  ?
  Li4  H1ab  3.84(2)  .  '3 545'  ?
  O1c  C3e  3.84(3)  .  .  ?
  C1le  C1lf  3.84(4)  .  .  ?
  O1lc  H1lf  3.840(14)  .  .  ?
  O1f  C3a  3.84(3)  .  .  ?
  C9a  C2a  3.84(5)  .  .  ?
  C3f  C8f  3.84(5)  .  .  ?
  C3a  H2bb  3.849(13)  .  .  ?
  C1a  H6b  3.85(2)  .  .  ?
  C2e  H2fb  3.85(4)  .  .  ?
  C4f  C1f  3.85(5)  .  .  ?
  C2lc  H1cb  3.85(2)  .  '3 445'  ?
  C3b  H2ab  3.85(3)  .  .  ?
  O1le  H7a  3.85(2)  .  '2 564'  ?
  C1c  C6d  3.85(4)  .  .  ?
  C6f  H1fc  3.85(3)  .  '2 574'  ?
  C6a  C2c  3.85(4)  .  '4 465'  ?
  C2b  C9b  3.85(4)  .  .  ?
  O1d  H5d  3.86(3)  .  .  ?
  O2b  O3f  3.86(3)  .  .  ?
  O1e  C3c  3.86(3)  .  .  ?
  C3b  C8b  3.86(4)  .  .  ?
  C5d  H1fa  3.86(2)  .  '3 545'  ?
  C5b  H1ea  3.86(2)  .  '3 445'  ?
  C8c  C3c  3.86(4)  .  .  ?
  C6c  C1d  3.86(4)  .  .  ?
  C1e  C5f  3.86(5)  .  .  ?
  O2a  O3d  3.87(4)  .  .  ?
  C7e  C7b  3.87(4)  .  '4 565'  ?
  C4e  C2f  3.87(4)  .  .  ?
  C7c  H1dc  3.87(2)  .  .  ?
  C4c  H5a  3.87(3)  .  '4 564'  ?
  C7d  H1ca  3.87(3)  .  .  ?
  C2ld  H1dc  3.87(2)  .  .  ?
  O3c  O2f  3.87(4)  .  .  ?
  C3e  C5f  3.87(4)  .  .  ?
  C1f  H6d  3.874(16)  .  '3 455'  ?
  C1lc  H1bc  3.875(15)  .  .  ?
  C7c  C1d  3.88(4)  .  .  ?
  Li4  N1ld  3.88(5)  .  .  ?
  C9d  C2d  3.88(4)  .  .  ?
  C2e  H5f  3.88(3)  .  .  ?
  C1lb  H6b  3.88(3)  .  '4 565'  ?
  C9c  H2da  3.88(2)  .  .  ?
  C3d  O2c  3.88(3)  .  .  ?
  O2e  C3f  3.88(4)  .  .  ?
  C1lc  O1le  3.88(3)  .  .  ?
  C9a  H2bb  3.88(2)  .  .  ?
  C6a  H1cb  3.89(3)  .  '4 465'  ?
  C5e  C2f  3.89(5)  .  .  ?
  C1b  C6a  3.89(4)  .  .  ?
  O3d  O3b  3.89(4)  .  '4 565'  ?
  N1lc  C3le  3.89(4)  .  '2 565'  ?
  O1lc  H3leb  3.89(4)  .  '2 565'  ?
  O2e  Li3  3.89(2)  .  .  ?
  O1ld  H1cb  3.89(2)  .  '3 445'  ?
  C4d  C2c  3.89(4)  .  .  ?
  O1f  C3e  3.89(5)  .  .  ?
  O3d  C7b  3.90(4)  .  '4 565'  ?
  C3c  H6a  3.90(3)  .  '4 564'  ?
  C9d  O2c  3.90(4)  .  .  ?
  C7d  O3b  3.90(4)  .  '4 565'  ?
  N1la  H6e  3.899(10)  .  '2 574'  ?
  C3lf  H2db  3.90(3)  .  .  ?
  O2b  Li2  3.90(4)  .  .  ?
  C9c  C2c  3.90(4)  .  .  ?
  C1lb  H2fb  3.90(2)  .  '2 575'  ?
  C4c  C1c  3.90(4)  .  .  ?
  O1lf  H6c  3.90(2)  .  '2 565'  ?
  C6b  H2ea  3.90(2)  .  '3 445'  ?
  O2d  O3e  3.90(3)  .  .  ?
  O2d  Li1  3.90(4)  .  .  ?
  C2le  H2ea  3.90(3)  .  '3 445'  ?
  O2a  Li2  3.91(5)  .  .  ?
  O1a  H5a  3.91(3)  .  .  ?
  C3lf  H5d  3.91(3)  .  .  ?
  C3lc  H1cc  3.91(3)  .  '3 445'  ?
  C1a  C4a  3.91(4)  .  .  ?
  C7b  H1aa  3.91(3)  .  .  ?
  O2c  O3b  3.91(4)  .  .  ?
  C6b  H2ba  3.91(3)  .  .  ?
  Ti1  H7b  3.91(3)  .  '4 565'  ?
  C2a  H2bb  3.915(18)  .  .  ?
  C1e  C7f  3.92(5)  .  .  ?
  C1e  C4e  3.92(5)  .  .  ?
  N1lf  H1bb  3.92(3)  .  .  ?
  C1a  H6c  3.92(3)  .  '4 465'  ?
  O3c  H1da  3.919(18)  .  .  ?
  C9f  H1eb  3.92(3)  .  .  ?
  O2f  C3e  3.92(4)  .  .  ?
  C2b  H2ab  3.92(2)  .  .  ?
  C1lf  H1db  3.92(3)  .  .  ?
  O2e  O3a  3.92(4)  .  .  ?
  C7c  H2da  3.92(3)  .  .  ?
  O1lc  H3lcb  3.92(4)  .  .  ?
  O1lb  H2ca  3.924(13)  .  '4 465'  ?
  C4d  H7d  3.92(3)  .  .  ?
  C3la  H6e  3.926(13)  .  '2 574'  ?
  C1lb  H2eb  3.93(2)  .  '2 575'  ?
  H3lbc  C1ld  3.93(3)  .  '2 565'  ?
  C7d  C8f  3.93(4)  .  '4 565'  ?
  C6b  C2a  3.93(4)  .  .  ?
  Li2  H1ca  3.93(4)  .  .  ?
  C1f  H5f  3.94(4)  .  .  ?
  N1la  H1ab  3.94(2)  .  '4 564'  ?
  C2c  H2da  3.94(2)  .  .  ?
  C5c  C3d  3.94(5)  .  .  ?
  C2f  H6d  3.94(2)  .  '3 455'  ?
  O1a  C9f  3.94(4)  .  .  ?
  O1la  H2bb  3.94(3)  .  '4 564'  ?
  O1b  H5b  3.94(3)  .  .  ?
  O1lb  H3lba  3.94(4)  .  .  ?
  C1a  H5a  3.94(3)  .  .  ?
  C1f  C7f  3.94(4)  .  '2 575'  ?
  C1e  C6f  3.95(5)  .  .  ?
  C4a  H1ba  3.945(16)  .  .  ?
  O1la  H3lac  3.95(4)  .  .  ?
  C1lc  C3le  3.95(4)  .  '2 565'  ?
  C2le  H2ba  3.95(3)  .  .  ?
  C2d  H2fa  3.95(3)  .  '3 545'  ?
  C2lc  H5e  3.95(3)  .  '3 445'  ?
  O1e  H5e  3.95(2)  .  .  ?
  C3lb  H1cc  3.95(3)  .  '4 465'  ?
  C5a  C5c  3.96(4)  .  '4 465'  ?
  C3f  C5e  3.96(4)  .  .  ?
  O3f  C8b  3.96(4)  .  .  ?
  C1la  H1ac  3.96(2)  .  '4 564'  ?
  C6a  H2aa  3.96(3)  .  .  ?
  C8e  C7b  3.96(4)  .  '4 565'  ?
  C4b  C1b  3.96(4)  .  .  ?
  O2f  Li3  3.96(3)  .  .  ?
  O1la  H2aa  3.96(2)  .  '4 564'  ?
  O3c  O1d  3.96(4)  .  .  ?
  C3a  H6c  3.96(3)  .  '4 465'  ?
  C3lb  H7a  3.965(14)  .  .  ?
  C2b  H2ea  3.96(3)  .  '3 445'  ?
  N1ld  C2lf  3.96(4)  .  '2 564'  ?
  O1e  C3f  3.97(5)  .  .  ?
  C7d  C1c  3.97(5)  .  .  ?
  C3le  H1ba  3.97(2)  .  '2 564'  ?
  C3c  H5d  3.97(2)  .  .  ?
  C4e  H1ec  3.97(4)  .  .  ?
  C1a  C5b  3.97(3)  .  .  ?
  C2b  C6a  3.97(4)  .  .  ?
  O3c  H7d  3.97(2)  .  '4 464'  ?
  Li3  O3a  3.97(5)  .  .  ?
  O1e  O3f  3.97(4)  .  .  ?
  C4a  H1aa  3.97(3)  .  .  ?
  H3lbc  O1ld  3.974(17)  .  '2 565'  ?
  C8e  H6b  3.97(3)  .  '4 565'  ?
  C2f  H5e  3.98(3)  .  .  ?
  C8b  H1ac  3.98(3)  .  .  ?
  C3d  H2cb  3.98(3)  .  .  ?
  N1le  H2ba  3.98(3)  .  .  ?
  O3e  Li1  3.98(5)  .  .  ?
  C1b  H5b  3.98(3)  .  .  ?
  C4c  H1ca  3.98(3)  .  .  ?
  C2le  H2lca  3.98(4)  .  .  ?
  C7b  C1a  3.98(5)  .  .  ?
  C9a  C4b  3.98(4)  .  .  ?
  C9e  C2e  3.98(4)  .  .  ?
  C2lc  H3leb  3.98(4)  .  '2 565'  ?
  C6c  H5a  3.98(2)  .  '4 564'  ?
  C3le  H1bb  3.99(3)  .  '2 564'  ?
  C2d  H2cb  3.99(2)  .  .  ?
  C1lb  H7e  3.99(3)  .  .  ?
  C2lb  H6f  3.990(13)  .  '2 575'  ?
  C2lb  H6c  3.99(3)  .  '4 465'  ?
  O1b  O3a  3.99(4)  .  .  ?
  O2a  C9b  3.99(4)  .  .  ?
  O1e  C9c  3.99(3)  .  .  ?
  C2c  C6d  3.99(4)  .  .  ?
  O2d  C3c  4.00(5)  .  .  ?
  C3lf  H6f  4.00(3)  .  '4 565'  ?
  C9c  O2f  4.00(4)  .  .  ?
  Li4  N1le  4.00(4)  .  .  ?
  O1f  O3e  4.00(4)  .  .  ?
  C1d  H5d  4.00(3)  .  .  ?
  C9b  H2ba  4.01(2)  .  .  ?
  Li4  C2lc  4.01(5)  .  .  ?
  O2b  C9a  4.01(5)  .  .  ?
  C1b  C7a  4.01(4)  .  .  ?
  C6f  H2fa  4.01(3)  .  .  ?
  C6a  H1bc  4.01(2)  .  .  ?
  C8d  H1ca  4.01(3)  .  .  ?
  Li2  H1ec  4.01(3)  .  .  ?
  C6d  H2fa  4.01(2)  .  '3 545'  ?
  O3f  C6d  4.01(4)  .  '4 464'  ?
  C6c  C2d  4.02(4)  .  .  ?
  C8b  H1aa  4.02(3)  .  .  ?
  Li4  N1lc  4.02(5)  .  .  ?
  Ti2  C7b  4.02(4)  .  .  ?
  C1ld  O1lf  4.02(4)  .  .  ?
  C4d  H1da  4.02(3)  .  .  ?
  O2e  C9f  4.02(4)  .  .  ?
  C1d  H6c  4.02(3)  .  .  ?
  C3b  C8a  4.02(4)  .  .  ?
  O2b  C3a  4.02(5)  .  .  ?
  C5d  H7f  4.02(3)  .  '4 565'  ?
  C6e  H1ec  4.02(3)  .  '2 575'  ?
  C3ld  C2lf  4.03(4)  .  '2 564'  ?
  C1lc  H3lea  4.03(4)  .  '2 565'  ?
  C9f  H2fb  4.03(2)  .  .  ?
  C9f  H2fa  4.03(3)  .  .  ?
  O1c  C9e  4.03(4)  .  .  ?
  C6b  H1aa  4.03(2)  .  .  ?
  C2e  H6b  4.029(18)  .  3  ?
  C2f  H2db  4.03(3)  .  '3 455'  ?
  C9a  H2ab  4.03(3)  .  .  ?
  C3lc  H1bc  4.030(10)  .  .  ?
  C2le  H6e  4.03(3)  .  '4 464'  ?
  O3d  Li2  4.04(5)  .  .  ?
  C3lc  H3lec  4.04(4)  .  '2 565'  ?
  C1lc  H3lec  4.04(4)  .  '2 565'  ?
  C1e  H6b  4.04(2)  .  3  ?
  C8e  O3a  4.04(2)  .  .  ?
  C8e  Li1  4.04(4)  .  .  ?
  C1e  H6f  4.04(3)  .  .  ?
  O3d  O1c  4.04(5)  .  .  ?
  O1a  O3b  4.04(5)  .  .  ?
  O3d  C5d  4.04(4)  .  .  ?
  Ti1  C7a  4.04(4)  .  .  ?
  O1c  C5d  4.05(2)  .  .  ?
  Li1  H1aa  4.05(4)  .  .  ?
  O2a  C6a  4.05(4)  .  .  ?
  O2d  C9e  4.053(17)  .  .  ?
  C3b  O1d  4.06(5)  .  .  ?
  O2b  C9f  4.061(18)  .  .  ?
  O2b  C6b  4.07(4)  .  .  ?
  C7e  C1f  4.07(5)  .  .  ?
  O2e  C9a  4.08(4)  .  .  ?
  C8d  Li2  4.08(4)  .  .  ?
  O2a  C9d  4.08(4)  .  .  ?
  Ti2  C7f  4.08(2)  .  .  ?
  C5e  C1f  4.08(5)  .  .  ?
  O3c  C5c  4.09(4)  .  .  ?
  O1e  C5f  4.09(4)  .  .  ?
  C9a  C2b  4.09(3)  .  .  ?
  O3d  C8a  4.09(5)  .  .  ?
  O1c  C3d  4.088(19)  .  .  ?
  C5c  C1d  4.09(3)  .  .  ?
  C9e  O2f  4.09(4)  .  .  ?
  C9c  C4d  4.09(4)  .  .  ?
  C8c  O3b  4.09(5)  .  .  ?
  O3c  C8f  4.09(2)  .  .  ?
  C8d  O3e  4.10(4)  .  .  ?
  C9b  O2c  4.10(4)  .  .  ?
  C9d  C4c  4.10(5)  .  .  ?
  C8a  Li3  4.10(6)  .  .  ?
  O3f  C5f  4.10(3)  .  .  ?
  C8d  Li3  4.11(5)  .  .  ?
  O3f  Li2  4.11(5)  .  .  ?
  O2d  C9c  4.11(5)  .  .  ?
  O1a  C5b  4.11(3)  .  .  ?
  C2f  C6e  4.11(5)  .  .  ?
  C8e  Li2  4.11(5)  .  .  ?
  C6b  O3e  4.11(4)  .  '4 464'  ?
  O1f  O1e  4.11(5)  .  .  ?
  C8a  Li1  4.12(4)  .  .  ?
  O1f  C9a  4.12(2)  .  .  ?
  O2e  C6e  4.12(3)  .  .  ?
  C5e  O3e  4.12(3)  .  .  ?
  O1e  Li1  4.12(5)  .  .  ?
  O1a  C3b  4.12(2)  .  .  ?
  C5d  C1c  4.12(3)  .  .  ?
  O1b  C3d  4.12(5)  .  .  ?
  O3c  Li3  4.13(5)  .  .  ?
  Ti1  C7e  4.13(2)  .  .  ?
  C5a  C1b  4.13(3)  .  .  ?
  C5a  O3a  4.13(4)  .  .  ?
  C5b  O3b  4.13(4)  .  .  ?
  C8d  C3c  4.13(5)  .  .  ?
  O3b  Li1  4.13(5)  .  .  ?
  Ti2  C4b  4.14(4)  .  .  ?
  C1e  C8f  4.14(4)  .  .  ?
  O1d  C9b  4.14(4)  .  .  ?
  O2f  C6f  4.14(3)  .  .  ?
  C8c  C1d  4.14(3)  .  .  ?
  C8c  C3d  4.14(4)  .  .  ?
  C2f  C6f  4.15(5)  .  .  ?
  C4d  O2c  4.15(3)  .  .  ?
  O2d  C6d  4.15(4)  .  .  ?
  Li4  H2ldc  4.15(5)  .  .  ?
  Li1  H1fc  4.16(3)  .  .  ?
  O1lc  C1le  4.16(3)  .  .  ?
  C8b  Li1  4.16(4)  .  .  ?
  O1f  C5e  4.16(4)  .  .  ?
  C8f  Li1  4.16(5)  .  .  ?
  O2a  C4b  4.16(4)  .  .  ?
  C1a  C6c  4.16(5)  .  '4 465'  ?
  N1ld  O1lf  4.16(4)  .  .  ?
  C2c  Li2  4.16(5)  .  .  ?
  C9b  C4a  4.17(5)  .  .  ?
  O1c  C7d  4.17(4)  .  .  ?
  O1a  C7b  4.17(4)  .  .  ?
  N1lc  O1le  4.17(4)  .  .  ?
  C1lc  O1lf  4.18(4)  .  .  ?
  Li4  N1lf  4.18(4)  .  .  ?
  C3a  C8b  4.18(5)  .  .  ?
  C3lb  C1ld  4.18(2)  .  '2 565'  ?
  C9c  C2d  4.19(3)  .  .  ?
  Ti1  C4a  4.19(4)  .  .  ?
  O1a  C4f  4.19(3)  .  .  ?
  C5d  C2f  4.20(3)  .  '3 545'  ?
  C2f  Li1  4.20(3)  .  .  ?
  C8c  Li2  4.20(4)  .  .  ?
  O1d  C3c  4.20(3)  .  .  ?
  C4e  Li1  4.20(4)  .  .  ?
  C6b  C2b  4.21(4)  .  .  ?
  C4e  C9f  4.21(4)  .  .  ?
  C3e  C8f  4.21(4)  .  .  ?
  O1e  C7f  4.21(4)  .  .  ?
  Ti2  C7c  4.21(4)  .  .  ?
  C2e  C9f  4.21(4)  .  .  ?
  Ti1  C7d  4.21(4)  .  .  ?
  Ti2  C4f  4.21(2)  .  .  ?
  C2a  C6a  4.21(4)  .  .  ?
  Li4  H3lfb  4.22(5)  .  .  ?
  C5b  C2e  4.22(3)  .  '3 445'  ?
  C6c  O2c  4.22(4)  .  .  ?
  C8f  Li2  4.22(5)  .  .  ?
  C9e  C4f  4.22(4)  .  .  ?
  C8f  C6d  4.23(5)  .  '4 464'  ?
  C4f  C1e  4.23(5)  .  .  ?
  C3e  C2f  4.23(5)  .  .  ?
  C8e  C3f  4.23(4)  .  .  ?
  C9a  C9b  4.23(5)  .  .  ?
  O1b  C9d  4.24(4)  .  .  ?
  O1b  C3a  4.24(3)  .  .  ?
  C4d  Li2  4.24(3)  .  .  ?
  C3a  C6c  4.24(4)  .  '4 465'  ?
  C2a  C5c  4.24(5)  .  '4 465'  ?
  Ti1  O1f  4.24(3)  .  .  ?
  C7c  C2a  4.24(4)  .  '4 564'  ?
  Li3  C8b  4.24(5)  .  .  ?
  Li3  H1da  4.25(4)  .  .  ?
  O1b  C7a  4.25(5)  .  .  ?
  C9d  C2c  4.25(5)  .  .  ?
  C2ld  C3lf  4.25(4)  .  .  ?
  O1f  Li2  4.25(5)  .  .  ?
  C3f  C2e  4.25(5)  .  .  ?
  O2e  C4f  4.25(4)  .  .  ?
  Ti1  C4e  4.26(2)  .  .  ?
  Ti2  O1e  4.26(3)  .  .  ?
  C6a  C1c  4.27(5)  .  '4 465'  ?
  Ti1  O1b  4.27(3)  .  .  ?
  O1b  C5a  4.27(5)  .  .  ?
  Li4  H2leb  4.27(5)  .  .  ?
  C3c  C2d  4.27(2)  .  .  ?
  O1f  C7e  4.27(4)  .  .  ?
  Ti2  O1a  4.27(5)  .  .  ?
  Ti2  C4c  4.27(4)  .  .  ?
  C8c  Li3  4.28(6)  .  .  ?
  C2e  Li2  4.28(3)  .  .  ?
  C5a  C2c  4.28(5)  .  '4 465'  ?
  C2e  C6f  4.28(4)  .  .  ?
  C7d  C3d  4.28(4)  .  .  ?
  O1e  C4c  4.28(3)  .  .  ?
  C2b  Li3  4.28(5)  .  .  ?
  C8d  O1d  4.29(4)  .  .  ?
  C3f  C7f  4.29(5)  .  .  ?
  C4b  Li1  4.29(3)  .  .  ?
  C2d  C6d  4.29(4)  .  .  ?
  C7e  C3e  4.29(5)  .  .  ?
  C4e  C1f  4.29(5)  .  .  ?
  C4a  C5b  4.29(4)  .  .  ?
  C6b  C3a  4.29(4)  .  .  ?
  Ti2  O1d  4.29(3)  .  .  ?
  O1a  C8a  4.30(4)  .  .  ?
  C3a  C7a  4.30(4)  .  .  ?
  C7a  C2c  4.30(5)  .  '4 465'  ?
  C9d  C9c  4.30(5)  .  .  ?
  C3b  C6a  4.30(5)  .  .  ?
  C4c  C5d  4.30(4)  .  .  ?
  C8a  C1b  4.30(3)  .  .  ?
  O1f  C8f  4.30(5)  .  .  ?
  C8d  C1c  4.31(5)  .  .  ?
  C3c  C7c  4.31(4)  .  .  ?
  C1a  C8b  4.31(5)  .  .  ?
  O1b  C8b  4.31(4)  .  .  ?
  C2d  Li3  4.31(5)  .  .  ?
  C2a  C9b  4.31(5)  .  .  ?
  Ti1  C4d  4.31(4)  .  .  ?
  Ti1  O1c  4.32(5)  .  .  ?
  C3c  C6d  4.32(4)  .  .  ?
  O1ld  C1lf  4.32(3)  .  .  ?
  C8e  C1f  4.32(4)  .  .  ?
  O1c  C4e  4.32(3)  .  .  ?
  O1d  C7c  4.32(5)  .  .  ?
  O1d  Li2  4.32(2)  .  .  ?
  C1e  C9f  4.32(4)  .  .  ?
  C9e  C2f  4.32(4)  .  .  ?
  O1d  C5c  4.33(5)  .  .  ?
  C7c  C2d  4.33(4)  .  .  ?
  C8e  O1e  4.33(5)  .  .  ?
  O3d  Li3  4.33(5)  .  .  ?
  C6c  C2c  4.33(4)  .  .  ?
  C3b  C7b  4.33(4)  .  .  ?
  C2la  C1lc  4.34(2)  .  '2 564'  ?
  C4f  Li2  4.34(4)  .  .  ?
  C8e  C6b  4.34(5)  .  '4 565'  ?
  O2d  C4c  4.34(5)  .  .  ?
  O3d  C8b  4.34(4)  .  '4 565'  ?
  C5a  C1a  4.34(4)  .  .  ?
  C2a  Li1  4.34(5)  .  .  ?
  Li4  H2lcc  4.34(5)  .  .  ?
  O1a  C6b  4.34(3)  .  .  ?
  O1c  C8c  4.34(4)  .  .  ?
  O1f  C6e  4.35(4)  .  .  ?
  C8d  O3b  4.35(4)  .  '4 565'  ?
  O2f  C4e  4.35(4)  .  .  ?
  O2b  C4a  4.35(5)  .  .  ?
  O2f  C3a  4.36(5)  .  .  ?
  C4b  C1a  4.36(4)  .  .  ?
  C1b  C5b  4.36(4)  .  .  ?
  C2e  C6e  4.36(5)  .  .  ?
  C2b  C7a  4.37(4)  .  .  ?
  C3c  C6a  4.37(5)  .  '4 564'  ?
  C1ld  O1le  4.37(4)  .  .  ?
  O1c  O1d  4.37(3)  .  .  ?
  C3f  C6e  4.37(4)  .  .  ?
  C4d  C5c  4.37(5)  .  .  ?
  C7c  C1a  4.37(5)  .  '4 564'  ?
  C5a  C4b  4.37(5)  .  .  ?
  C5f  C1f  4.38(5)  .  .  ?
  C3e  O2c  4.38(2)  .  .  ?
  C1f  C6d  4.39(3)  .  '3 455'  ?
  O2e  C3c  4.39(5)  .  .  ?
  C5c  C4a  4.39(4)  .  '4 564'  ?
  C8c  C2d  4.39(4)  .  .  ?
  C3a  C2b  4.39(2)  .  .  ?
  O1c  C6d  4.39(3)  .  .  ?
  C4c  C5a  4.39(4)  .  '4 564'  ?
  C2ld  C1lf  4.39(4)  .  .  ?
  C3b  C2a  4.40(4)  .  .  ?
  O1c  Li3  4.40(5)  .  .  ?
  C9e  C9f  4.40(4)  .  .  ?
  C1b  C4a  4.40(2)  .  .  ?
  C2c  C7d  4.40(5)  .  .  ?
  C1e  C5e  4.40(5)  .  .  ?
  O3a  Li1  4.40(4)  .  .  ?
  O1ld  C2lf  4.41(4)  .  '2 564'  ?
  C2f  C6d  4.41(3)  .  '3 455'  ?
  Li4  C1d  4.41(5)  .  .  ?
  C9e  C1f  4.41(4)  .  .  ?
  O3e  Li2  4.41(5)  .  .  ?
  O1b  Li1  4.41(2)  .  .  ?
  C4a  Li3  4.42(6)  .  .  ?
  O3c  Li2  4.42(4)  .  .  ?
  O3f  Li1  4.42(5)  .  .  ?
  C4c  C1d  4.42(3)  .  .  ?
  C2c  C3d  4.42(4)  .  .  ?
  C5d  C1d  4.42(4)  .  .  ?
  C8a  C2b  4.43(4)  .  .  ?
  C3e  Li1  4.43(4)  .  .  ?
  C3b  C7a  4.43(5)  .  .  ?
  C7b  C2a  4.44(5)  .  .  ?
  C9a  C1b  4.44(2)  .  .  ?
  Ti2  H7b  4.45(3)  .  .  ?
  O1a  Li3  4.46(5)  .  .  ?
  Ti1  H7e  4.464(15)  .  .  ?
  C4c  Li3  4.47(6)  .  .  ?
  Ti1  H7a  4.49(3)  .  .  ?
  Ti2  H7f  4.491(16)  .  .  ?
  Li4  H1ca  4.49(3)  .  '3 445'  ?
  C1f  Li1  4.51(3)  .  .  ?
  C1c  Li2  4.51(5)  .  .  ?
  Li3  O3b  4.51(5)  .  .  ?
  Ti1  O2c  4.54(5)  .  .  ?
  Ti2  H7c  4.55(3)  .  .  ?
  Ti1  O2b  4.55(4)  .  .  ?
  Ti1  H7d  4.57(3)  .  .  ?
  C3d  Li2  4.57(3)  .  .  ?
  Ti1  O2f  4.59(4)  .  .  ?
  Ti2  O2e  4.61(4)  .  .  ?
  C3f  Li2  4.61(4)  .  .  ?
  C5f  Li1  4.63(4)  .  .  ?
  Li4  C2le  4.63(5)  .  .  ?
  C3b  Li1  4.63(3)  .  .  ?
  C1e  Li2  4.63(4)  .  .  ?
  Ti2  O2a  4.64(5)  .  .  ?
  C5d  Li3  4.65(5)  .  .  ?
  Li4  C3lf  4.66(5)  .  .  ?
  Ti2  O2d  4.66(4)  .  .  ?
  C5c  Li2  4.66(5)  .  .  ?
  C1b  Li3  4.67(5)  .  .  ?
  Li3  C1d  4.68(5)  .  .  ?
  C1a  Li1  4.69(5)  .  .  ?
  C5e  Li2  4.70(4)  .  .  ?
  Ti2  C7d  4.71(4)  .  '4 464'  ?
  Ti1  O1a  4.73(4)  .  .  ?
  C5a  Li1  4.73(5)  .  .  ?
  C3c  Li3  4.74(5)  .  .  ?
  Ti1  O1d  4.77(3)  .  .  ?
  C3a  Li3  4.77(5)  .  .  ?
  Ti1  C7b  4.78(4)  .  '4 565'  ?
  Ti2  O1f  4.79(4)  .  .  ?
  Ti2  O1b  4.79(3)  .  .  ?
  Ti1  O1e  4.81(4)  .  .  ?
  Ti2  O1c  4.81(4)  .  .  ?
  C5b  Li3  4.82(5)  .  .  ?
  Ti1  C3a  4.96(4)  .  .  ?
  Ti1  C3e  5.01(3)  .  .  ?
  Ti2  C3b  5.01(4)  .  .  ?
  Ti1  Ti2  5.54(4)  .  .  ?
 
_atom_sites_solution_primary           ?
_atom_sites_solution_secondary         ?
_atom_sites_solution_hydrogens         ?
 
_geom_special_details                  ?
 
 
_cell_special_details
;      ?
;
 
_exptl_special_details
;      ?
;
 
_diffrn_special_details
;      ?
;
 
_chemical_compound_source              ?
_chemical_name_systematic              ?
_chemical_name_common                  ?
_chemical_formula_analytical           ?
_chemical_formula_structural           ?
 
_exptl_crystal_F_000                   3248
 
loop_
_diffrn_standard_refln_index_h
_diffrn_standard_refln_index_k
_diffrn_standard_refln_index_l
  ?  ?  ?
loop_
_diffrn_attenuator_code
_diffrn_attenuator_scale
  ?  ?
 
_reflns_limit_h_min                    0
_reflns_limit_h_max                    22
_reflns_limit_k_min                    0
_reflns_limit_k_max                    29
_reflns_limit_l_min                    -19
_reflns_limit_l_max                    22
_reflns_number_observed                ?
_reflns_d_resolution_high              .806
_reflns_d_resolution_low               14.21
 
_diffrn_reflns_av_sigmaI/netI          .041
_diffrn_reflns_theta_min               3.11
_diffrn_reflns_reduction_process      'perpendicular monochr Lp'
 
_diffrn_ambient_temperature            293
_diffrn_radiation_source               ?
_diffrn_radiation_monochromator        ?
_diffrn_radiation_detector             ?
 
_refine_ls_extinction_expression       ?
_refine_ls_matrix_type                 full
_refine_ls_number_restraints           0
_refine_ls_number_constraints          0
_refine_ls_R_factor_all                .13
_refine_ls_wR_factor_all               .198
_refine_ls_goodness_of_fit_all         1.011
_refine_ls_shift/su_mean               .01
 
 
 
#==========================================================================
#       Structure Factor lists should be submitted as separate files
#==========================================================================
 
#data_<structure> # but for xtal use the refln data is needed in same block
 
loop_
_refln_index_h
_refln_index_k
_refln_index_l
_refln_F_meas
_refln_F_calc
_refln_F_sigma
_refln_F_squared_meas
_refln_F_squared_calc
_refln_F_squared_sigma
_refln_observed_status
_refln_F_meas_friedel
_refln_F_sigma_friedel
_refln_F_squared_meas_friedel
_refln_F_squared_sigma_friedel
               ?  ?  ?  ?  ?  ?  ?  ?  ?  ?  ?  ?  ?  ?

#======================================================================_eof
